# Supplementary material for: Interventions for social isolation in older adults who have experienced a fall: a systematic review
Source: PubMed Central journal article supplement — BMJ Open. 2022 Mar 9;12(3):e056540. doi: 10.1136/bmjopen-2021-056540 (PMC8915346; doi:10.1136/bmjopen-2021-056540), 2022-03-09
Supplement: bmjopen-2021-056540.draft_revisions.pdf [file bmjopen-2021-056540.draft_revisions.pdf]

# BMJ Open

BMJ Open is committed to open peer review. As part of this commitment we make the peer review history of every article we publish publicly available.

When an article is published we post the peer reviewers' comments and the authors' responses online. We also post the versions of the paper that were used during peer review. These are the versions that the peer review comments apply to.

The versions of the paper that follow are the versions that were submitted during the peer review process. They are not the versions of record or the final published versions. They should not be cited or distributed as the published version of this manuscript.

BMJ Open is an open access journal and the full, final, typeset and author-corrected version of record of the manuscript is available on our site with no access controls, subscription charges or pay-per-view fees (<http://bmjopen.bmj.com>).

If you have any questions on BMJ Open's open peer review process please email [info.bmjopen@bmj.com](mailto:info.bmjopen@bmj.com)

# BMJ Open

## Interventions for social isolation in older adults who have experienced a fall: A systematic review

|                               |                                                                                                                                                                                                                                                                                                                                                                                                                                                                                                                                                                                                                                                                                                                                                                                                                                                                                                                                                                                                                                                                                                                                                                                                                                                                                                                                                                                                                                                                                                                                                                                                                       |
|-------------------------------|-----------------------------------------------------------------------------------------------------------------------------------------------------------------------------------------------------------------------------------------------------------------------------------------------------------------------------------------------------------------------------------------------------------------------------------------------------------------------------------------------------------------------------------------------------------------------------------------------------------------------------------------------------------------------------------------------------------------------------------------------------------------------------------------------------------------------------------------------------------------------------------------------------------------------------------------------------------------------------------------------------------------------------------------------------------------------------------------------------------------------------------------------------------------------------------------------------------------------------------------------------------------------------------------------------------------------------------------------------------------------------------------------------------------------------------------------------------------------------------------------------------------------------------------------------------------------------------------------------------------------|
| Journal:                      | <i>BMJ Open</i>                                                                                                                                                                                                                                                                                                                                                                                                                                                                                                                                                                                                                                                                                                                                                                                                                                                                                                                                                                                                                                                                                                                                                                                                                                                                                                                                                                                                                                                                                                                                                                                                       |
| Manuscript ID                 | bmjopen-2021-056540                                                                                                                                                                                                                                                                                                                                                                                                                                                                                                                                                                                                                                                                                                                                                                                                                                                                                                                                                                                                                                                                                                                                                                                                                                                                                                                                                                                                                                                                                                                                                                                                   |
| Article Type:                 | Original research                                                                                                                                                                                                                                                                                                                                                                                                                                                                                                                                                                                                                                                                                                                                                                                                                                                                                                                                                                                                                                                                                                                                                                                                                                                                                                                                                                                                                                                                                                                                                                                                     |
| Date Submitted by the Author: | 19-Aug-2021                                                                                                                                                                                                                                                                                                                                                                                                                                                                                                                                                                                                                                                                                                                                                                                                                                                                                                                                                                                                                                                                                                                                                                                                                                                                                                                                                                                                                                                                                                                                                                                                           |
| Complete List of Authors:     | Tricco, Andrea; St Michael's Hospital Li Ka Shing Knowledge Institute, Knowledge Translation Program; University of Toronto Dalla Lana School of Public Health, Epidemiology Division and Institute for Health, Management, and Evaluation<br>Thomas, Sonia; St Michael's Hospital Li Ka Shing Knowledge Institute, Knowledge Translation Program<br>Radhakrishnan, Amruta; St Michael's Hospital Li Ka Shing Knowledge Institute, Knowledge Translation Program<br>Ramkissoon, Naveeta; St Michael's Hospital Li Ka Shing Knowledge Institute, Knowledge Translation Program<br>Mitchell, Gary; Queen's University Belfast,<br>Fortune, Jennifer; RCSI University of Medicine and Health Sciences, Department of Public Health and Epidemiology<br>Jiang, Ying; Public Health Agency of Canada, Applied Research Division<br>de Groh, Margaret; Public Health Agency of Canada, Applied Research Division<br>Anderson, Kerry; Public Health Agency of Canada, Centre for Health Promotion<br>Barker, Joan; St Michael's Hospital Li Ka Shing Knowledge Institute, Knowledge Translation Program<br>Gauthier-Beaupré, Amélie; Public Health Agency of Canada, Centre for Health Promotion; University of Ottawa, Faculty of Health Sciences<br>Watt, Jennifer; St Michael's Hospital Li Ka Shing Knowledge Institute, Knowledge Translation Program; University of Toronto Faculty of Medicine, Department of Geriatric Medicine<br>Straus, Sharon; St Michael's Hospital Li Ka Shing Knowledge Institute, Knowledge Translation Program; University of Toronto Faculty of Medicine, Department of Geriatric Medicine |
| Keywords:                     | REHABILITATION MEDICINE, GERIATRIC MEDICINE, PREVENTIVE MEDICINE                                                                                                                                                                                                                                                                                                                                                                                                                                                                                                                                                                                                                                                                                                                                                                                                                                                                                                                                                                                                                                                                                                                                                                                                                                                                                                                                                                                                                                                                                                                                                      |
|                               |                                                                                                                                                                                                                                                                                                                                                                                                                                                                                                                                                                                                                                                                                                                                                                                                                                                                                                                                                                                                                                                                                                                                                                                                                                                                                                                                                                                                                                                                                                                                                                                                                       |

SCHOLARONE™  
Manuscripts

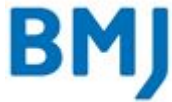

I, the Submitting Author has the right to grant and does grant on behalf of all authors of the Work (as defined in the below author licence), an exclusive licence and/or a non-exclusive licence for contributions from authors who are: i) UK Crown employees; ii) where BMJ has agreed a CC-BY licence shall apply, and/or iii) in accordance with the terms applicable for US Federal Government officers or employees acting as part of their official duties; on a worldwide, perpetual, irrevocable, royalty-free basis to BMJ Publishing Group Ltd ("BMJ") its licensees and where the relevant Journal is co-owned by BMJ to the co-owners of the Journal, to publish the Work in this journal and any other BMJ products and to exploit all rights, as set out in our [licence](#).

The Submitting Author accepts and understands that any supply made under these terms is made by BMJ to the Submitting Author unless you are acting as an employee on behalf of your employer or a postgraduate student of an affiliated institution which is paying any applicable article publishing charge ("APC") for Open Access articles. Where the Submitting Author wishes to make the Work available on an Open Access basis (and intends to pay the relevant APC), the terms of reuse of such Open Access shall be governed by a Creative Commons licence – details of these licences and which [Creative Commons](#) licence will apply to this Work are set out in our licence referred to above.

Other than as permitted in any relevant BMJ Author's Self Archiving Policies, I confirm this Work has not been accepted for publication elsewhere, is not being considered for publication elsewhere and does not duplicate material already published. I confirm all authors consent to publication of this Work and authorise the granting of this licence.

# Interventions for social isolation in older adults who have experienced a fall:

## A systematic review

- 1  
2  
3  
4  
5  
6  
7  
8  
9  
10  
11  
12  
13  
14  
15  
16  
17  
18  
19  
20  
21  
22  
23  
24  
25  
26  
27  
28  
29  
30  
31  
32  
33  
34  
35  
36  
37  
38  
39  
40  
41  
42  
43  
44  
45  
46  
47  
48  
49  
50  
51  
52  
53  
54  
55  
56  
57  
58  
59  
60
- 1                    **Interventions for social isolation in older adults who have experienced a fall:**
- 2                    **A systematic review**
- 3    Andrea C. Tricco<sup>1,2\*</sup>                    email: [Andrea.Tricco@unityhealth.to](mailto:Andrea.Tricco@unityhealth.to)
- 4    Sonia M. Thomas<sup>1</sup>                    email: [Sonia.Thomas@unityhealth.to](mailto:Sonia.Thomas@unityhealth.to)
- 5    Amruta Radhakrishnan<sup>1</sup>                    email: [Amruta.Radhakrishnan@unityhealth.to](mailto:Amruta.Radhakrishnan@unityhealth.to)
- 6    Naveeta Ramkissoon<sup>1</sup>                    email: [Naveeta.Ramkissoon@unityhealth.to](mailto:Naveeta.Ramkissoon@unityhealth.to)
- 7    Gary Mitchell<sup>3</sup>                    email: [Gary.Mitchell@qub.ac.uk](mailto:Gary.Mitchell@qub.ac.uk)
- 8    Jennifer Fortune<sup>4</sup>                    email: [jenniferfortune@rcsi.ie](mailto:jenniferfortune@rcsi.ie)
- 9    Ying Jiang<sup>5</sup>                    email: [ying.jiang@canada.ca](mailto:ying.jiang@canada.ca)
- 10   Margaret de Groh<sup>5</sup>                    email: [margaret.degroh@canada.ca](mailto:margaret.degroh@canada.ca)
- 11   Kerry Anderson<sup>6</sup>                    email: [kerry.anderson3@canada.ca](mailto:kerry.anderson3@canada.ca)
- 12   Joan Barker<sup>1</sup>                    email: [joanbarker@rogers.com](mailto:joanbarker@rogers.com)
- 13   Amélie Gauthier-Beaupré<sup>6,7</sup>                    email: [amelie.gauthier-beaupre@canada.ca](mailto:amelie.gauthier-beaupre@canada.ca)
- 14   Jennifer Watt<sup>1,8</sup>                    email: [Jennifer.Watt@unityhealth.to](mailto:Jennifer.Watt@unityhealth.to)
- 15   Sharon E. Straus<sup>1,8</sup>                    email: [Sharon.Straus@utoronto.ca](mailto:Sharon.Straus@utoronto.ca)
- 16   <sup>1</sup>Li Ka Shing Knowledge Institute, St. Michael's Hospital, 209 Victoria Street, East Building,  
17   Toronto, Ontario, M5B 1W8, Canada
- 18   <sup>2</sup>Epidemiology Division and Institute for Health, Management, and Evaluation, Dalla Lana  
19   School of Public Health, University of Toronto, Toronto, Ontario, Canada
- 20   <sup>3</sup>School of Nursing and Midwifery, Queen's University Belfast, Belfast, Ireland
- 21   <sup>4</sup>Department of Public Health and Epidemiology, RCSI University of Medicine and Health  
22   Sciences, Dublin, Ireland

1  
2  
3 23 <sup>5</sup>Centre for Surveillance and Applied Research, Public Health Agency of Canada, Ottawa,  
4  
5 24 Ontario, Canada

6  
7  
8 25 <sup>6</sup>Centre for Health Promotion, Public Health Agency of Canada, Ottawa, Ontario, Canada

9  
10 26 <sup>7</sup>Faculty of Health Sciences, University of Ottawa, Ottawa, Ontario, Canada

11  
12 27 <sup>8</sup>Department of Geriatric Medicine, University of Toronto, Toronto, Ontario, Canada

13  
14  
15 28 **\*Corresponding Author:**

16  
17 29 Dr. Andrea C. Tricco, PhD, MSc

18  
19 30 Scientist and Director of the Knowledge Synthesis Team,

20  
21 31 Knowledge Translation Program, Li Ka Shing Knowledge Institute, St. Michael's Hospital

22  
23 32 209 Victoria Street, East Building, Toronto, Ontario, M5B 1W8, Canada

24  
25 33 Phone: (416) 864-6060 ext. 77521, Fax: (416) 864-6057, Email: [Andrea.Tricco@unityhealth.to](mailto:Andrea.Tricco@unityhealth.to)

26  
27 34

28  
29 35

1  
2  
3 36 **ABSTRACT**  
4

5 37 **Objectives:** The objective of our systematic review was to identify effective interventions to  
6  
7  
8 38 prevent or mitigate social isolation in older adults who experienced a fall.  
9

10 39 **Design:** Systematic review  
11

12 40 **Data Sources:** MEDLINE, Embase, the Cochrane Central Register of Controlled Trials, and  
13  
14  
15 41 Ageline were searched (inception to February 2020).  
16

17 42 **Methods:** Studies were eligible if they described any intervention for social isolation in older  
18  
19 43 adults living in a community setting who experienced a fall, and reported outcomes related to  
20  
21 44 social isolation or loneliness.  
22

23  
24 45 Two independent reviewers screened citations, abstracted data, and appraised risk of bias. The  
25  
26 46 results were summarized descriptively.  
27

28 47 **Results:** After screening 4,069 citations and 55 full-text articles, 4 studies were included. The  
29  
30 48 four studies varied in study design, including a randomized controlled trial, non-randomized  
31  
32 49 controlled trial, an uncontrolled before-after study, and a quasi-experimental study. Interventions  
33  
34 50 varied widely, and included singing in a choir, a patient-centred, interprofessional primary care  
35  
36 51 team-based approach, a multifactorial assessment targeting fall risk, appropriate medication use,  
37  
38 52 loneliness and frailty, and a community-based care model that included comprehensive  
39  
40 53 assessments and multilevel care coordination. Outcome measures varied and included scales for  
41  
42 54 loneliness, social isolation, social interaction, social networks, and social satisfaction. Mixed  
43  
44 55 results were found, with three studies reporting no differences in social isolation after the  
45  
46 56 intervention. Only the multifactorial assessment intervention demonstrated a small positive effect  
47  
48 57 on loneliness compared to the control group after adjustment (B= -0.18, 95% CI= -0.35 to -0.02).  
49  
50  
51  
52  
53  
54  
55  
56  
57  
58  
59  
60

1  
2  
3 58 **Conclusions:** Few studies examined interventions for social isolation in older adults who  
4  
5 59 experienced a fall. More research is warranted in this area.  
6

7  
8 60 **Systematic Review Registration:** PROSPERO (CRD42020198487)  
9

10 61 **Word count:** 260 (abstract), 2671 (main text)  
11

12 62 **Keywords:** systematic review, older adults, falling, social isolation, loneliness, interventions  
13

14  
15 63 **Strengths and limitations of this study:**  
16

- 17 64 • We conducted a comprehensive search of 4 databases, using a search strategy which was  
18  
19 65 peer-reviewed by a second librarian, and supplemented this by searching grey literature  
20  
21 66 and scanning references of included studies and relevant reviews.  
22  
23  
24 67 • We followed the methodology outlined by the Cochrane Handbook, with screening, data  
25  
26 68 abstraction, and risk of bias appraisal being conducted in duplicate by independent  
27  
28 69 reviewers, and our findings were reported using the PRISMA-2020 checklist.  
29  
30  
31 70 • We deviated from our protocol slightly due to the limited of data on older adults in a  
32  
33 71 community setting who had experienced a fall, and expanded our inclusion criteria to  
34  
35 72 include studies where some participants (not all) had a history of falling.  
36  
37  
38 73 • Our included studies were plagued by risk of bias across several components, including  
39  
40 74 poor allocation concealment, lack of random sequence generation, and a lack of blinding  
41  
42 75 of participants, personnel, and outcome assessors.  
43  
44  
45 76 • A lack of standardization was observed across the outcomes assessed in the included  
46  
47 77 studies, due to lack of consensus on measures for social isolation and loneliness.  
48  
49  
50  
51  
52  
53  
54  
55  
56  
57  
58  
59  
60

## 78 INTRODUCTION

79 Worldwide, more than 37 million falls occur requiring medical attention every year[1]. Almost  
80 650,000 people die every year from a fall, with those aged 65 years and older experiencing the  
81 greatest number of fatal falls[1]. Falls are associated with considerable negative outcomes on  
82 older adults, such as physical inactivity, anxiety, depressive symptoms, and fear of falling[2, 3].

83 Social isolation is a serious consequence among older adults who have experienced a  
84 fall[4]. Social isolation is a complex phenomenon that can be characterized by five key  
85 attributes: decreased number of social contacts, decreased feeling of belonging, reduced or lack  
86 of fulfilling relationships, decreased engagement with others, and reduced quality of the  
87 members in one's network[5]. Recent studies examined the bidirectional relationship between  
88 falling and social isolation, and some research focused on the risk of falling amongst older adults  
89 who were socially isolated[6-8]. Other research has focused on the risk of social isolation after  
90 experiencing a fall, since people who have experienced a fall are less likely to continue their  
91 activities of daily living[4]. For example, one study reported a statistically significant  
92 relationship between feelings of loneliness and social exclusion after experiencing a fall[4].

93 Regardless of the direction of the relationship, social isolation among older adults is  
94 associated with many adverse health outcomes, including cognitive decline, depression, anxiety,  
95 and dementia[9]. Interventions to mitigate social isolation after older adults experience a fall is  
96 of paramount importance. The objective of our systematic review was to identify effective  
97 interventions to mitigate social isolation in older adults who lived independently in a community  
98 setting with a history of falling.

## 99 METHODS

### 100 Protocol



1  
2  
3 101 The protocol for this systematic review was developed in accordance with the Preferred  
4  
5 102 Reporting Items for Systematic Review and Meta-Analysis Protocols (PRISMA-P) checklist,  
6  
7 103 with consultation from knowledge users and clinical experts and was registered on PROSPERO  
8  
9 104 (CRD42020198487). This systematic review was conducted according to methodology outlined  
10  
11 105 in the Cochrane Handbook[10], and the PRISMA checklist (Supplementary File 1) was used to  
12  
13 106 guide the reporting of our results[11].  
14

### 15 107 Search strategy and selection criteria

16  
17 108 A comprehensive literature search strategy was developed by an experienced information  
18  
19 109 specialist and peer-reviewed by a second information specialist using the Peer Review of  
20  
21 110 Electronic Search Strategies (PRESS) checklist[12]. MEDLINE, Embase, the Cochrane Central  
22  
23 111 Register of Controlled Trials, and Ageline were searched from inception until February 25, 2020  
24  
25 112 (Appendix 1). The reference lists of included studies and relevant reviews were also scanned. A  
26  
27 113 search for grey literature was conducted using the Canadian Agency for Drugs and Technologies  
28  
29 114 in Health (CADTH)'s Grey Matters checklist[13].  
30  
31  
32

33 115 Our eligibility criteria are summarized in Table 2. Studies were eligible for inclusion if  
34  
35 116 they described any intervention for social isolation in older adults (mean age 65 years and older)  
36  
37 117 with a history of falling and who lived independently in a community setting. Eligible study  
38  
39 118 designs included randomized controlled trials (RCTs), cohort studies, case control studies, non-  
40  
41 119 randomized controlled trials, quasi-experimental studies, interrupted time series or  
42  
43 120 controlled/uncontrolled before after studies. Case reports, case series, cross-sectional studies,  
44  
45 121 qualitative studies, and reviews were not eligible for inclusion. Outcomes of interest included  
46  
47 122 any changes in social isolation as measured using validated scales, such as the De Jong Gierveld  
48  
49  
50  
51  
52  
53  
54  
55  
56  
57  
58  
59  
60

1  
2  
3 123 loneliness scale[14] and the Bude & Lantermann scale for social exclusion[15], or any other  
4  
5 124 quantitative measure of social isolation or loneliness.  
6  
7

8 125 All citations were screened by two independent reviewers after the entire team completed  
9  
10 126 a training exercise on 50 citations and 78% agreement was achieved. Full-text screening by two  
11  
12 127 independent reviewers began after a training exercise on 22 articles amongst the team with an  
13  
14 128 agreement of 75%. Discrepancies for both levels of screening were resolved by a third reviewer  
15  
16  
17 129 or through discussion.  
18

### 19 130 Data abstraction and risk of bias appraisal

20  
21 131 Data abstraction and risk of bias appraisal were also conducted independently by pairs of  
22  
23 132 reviewers after a training pilot exercise reached sufficient agreement, and discrepancies were  
24  
25  
26 133 resolved by a third reviewer. The risk of bias appraisal was conducted using the Cochrane  
27  
28 134 Effective Practice and Organisation of Care (EPOC) risk of bias tool, as it was expected that a  
29  
30  
31 135 mixture of study designs would be included[16].  
32

### 33 136 Synthesis

34  
35 137 The findings of this review were summarized descriptively, reporting study and patient  
36  
37 138 characteristics, quality appraisal assessment, and intervention details. As outlined in our review  
38  
39 139 protocol, we planned to conduct a meta-analysis if more than one study evaluated the same  
40  
41  
42 140 intervention, and a network meta-analysis for connected networks of trials with pre-specified  
43  
44 141 intervention nodes if over 10 trials were available and the number of trials was greater than the  
45  
46 142 number of interventions. However, as these conditions were not met, no statistical analyses were  
47  
48  
49 143 conducted.  
50

### 51 52 144 Patient and Public Involvement 53 54 55 56 57 58 59 60

1  
2  
3 145 A patient partner with previous experience of a fall was identified and involved in this study  
4  
5 146 from the protocol development stage. The patient partner provided input on our research question  
6  
7 147 and outcome measures to ensure that the patient perspective was incorporated. They also  
8  
9 148 participated in the screening training exercises for citations and full-text articles, provided  
10  
11 149 feedback on screening eligibility criteria, and reviewed the manuscript as a coauthor.  
12  
13  
14

## 15 150 **RESULTS**

### 16 151 Study flow

17  
18  
19  
20 152 After screening 4,069 citations and 55 full-text articles against our eligibility criteria, 4  
21  
22 153 studies[17-19] met the eligibility criteria and were included in this review (Figure 1).  
23  
24

### 25 154 Study and patient characteristics

26  
27 155 Study and patient characteristics are summarized in Table 1 and detailed characteristics are  
28  
29 156 reported in Appendices 1 and 2. The mean age of participants across included studies was 77.8  
30  
31 157 years (range: 76 to 79.5 years). Three of the included studies were conducted in North America  
32  
33 158 (75.0%) and one in Europe (25.0%) and they were conducted in a variety of settings including  
34  
35 159 the community setting, a combination of participant homes and community setting, a  
36  
37 160 combination of primary care and community setting, or a combination of participant homes and  
38  
39 161 primary care. Only one study provided data on frailty of the included participants, reporting  
40  
41 162 20.2% of participants with frailty (Appendix 2). The four studies varied in study design,  
42  
43 163 including a randomized controlled trial, a non-randomized controlled trial, an uncontrolled  
44  
45 164 before-after study, and a quasi-experimental study in which data from one randomized site was  
46  
47 165 combined with data from four controlled before-after sites. Two of the studies had a study  
48  
49 166 duration of 12 months, and the other two had a duration of 6 months. The sample size in the  
50  
51 167 studies ranged from 21 to 2325 and, on average, 71.3% of participants were female.  
52  
53  
54  
55  
56  
57  
58  
59  
60

1  
2  
3 168 Risk of bias results  
4

5 169 An overall summary of risk of bias across the four studies can be found in Appendix 3, and  
6  
7 170 detailed risk of bias assessments can be found in Appendix 4. All of the studies had low risk of  
8  
9 171 bias for baseline outcome measurements (100% low, 0% unclear, 0% high), and other bias  
10  
11 172 (100% low, 0% unclear, 0% high). Two of the studies had low risk and two had unclear risk of  
12  
13 173 bias for selective reporting (50% low, 50% unclear, 0% high). One study had high risk, two  
14  
15 174 studies unclear risk, and one had low risk of bias for incomplete outcome data (25% low, 50%  
16  
17 175 unclear, 25% high). However, three of four studies had high risk of bias for blinding of outcome  
18  
19 176 assessment (25% low, 0% unclear, 75% high), blinding of participants and personnel (25% low,  
20  
21 177 0% unclear, 75% high), random sequence generation (25% low, 0% unclear, 75% high), and  
22  
23 178 allocation concealment (25% low, 0% unclear, 75% high).  
24  
25  
26  
27

28 179 Outcome results  
29

30 180 The relevant findings from the four included studies are summarized in Appendix 6.  
31  
32 181 Cohen et al. (2006) conducted a non-randomized controlled trial in the United States assessing  
33  
34 182 the effects of singing in a chorale compared to usual care in 166 older adults. The chorale  
35  
36 183 intervention involved attendance at weekly singing rehearsals and several public performances,  
37  
38 184 while the usual care group continued their usual activities. Both groups had a similar baseline  
39  
40 185 history of falling over the past 12 months (average of 0.40 falls per person in the intervention  
41  
42 186 group, and 0.36 per person in the control group). After 12 months of follow-up, they noted a  
43  
44 187 reduction in loneliness (as measured using the UCLA Loneliness Scale-III) in both groups  
45  
46 188 (chorale: baseline mean: 35.1 (SD, 8.1) and follow-up mean: 34.6 (SD, 7.9); usual care: baseline  
47  
48 189 mean: 38.3 (SD, 10.1) and follow-up mean: 37.0 (SD, 10.3). While the chorale intervention  
49  
50  
51  
52  
53  
54  
55  
56  
57  
58  
59  
60

1  
2  
3 190 reported lower loneliness scores than the usual care group after 12 months of follow-up, no  
4  
5 191 statistically significant difference was observed ( $F(1,126) = 3.08; p = 0.08$ ).

7 192 Scharlach et al. (2015) conducted an uncontrolled before-after study in the United States  
9  
10 193 assessing the effectiveness of their ElderHelp Concierge Club intervention in a sample of 21  
11  
12 194 participants. The Concierge Club intervention was a community-based care model that provided  
13  
14 195 different tiers of services to their members including information and referrals, transportation, or  
15  
16 196 in-house assessments. The baseline mean number of falls over the past 6 months was 1.3. They  
17  
18 197 noted that social isolation, as measured using an unnamed 3-item scale[20], did not change  
19  
20 198 significantly after 6 months of follow-up (baseline mean: 8.7 (SD, 3.2) and follow-up mean: 7.0  
21  
22 199 (SD, 3.8)). Similarly, although all participants reported having contact with friends/relatives after  
23  
24 200 the intervention, this was not found to be a significant change from baseline (baseline: 76% of  
25  
26 201 participants, follow-up: 100% of participants).

27  
28  
29  
30 202 Franse et al. (2018) conducted a quasi-experimental study comparing the effectiveness of  
31  
32 203 the Urban Health Centres Europe (UHCE) approach compared to usual care in a sample of 1,844  
33  
34 204 older adults across the United Kingdom, Greece, Croatia, the Netherlands, and Spain. The UHCE  
35  
36 205 approach involved a preventative multidimensional health assessment, which informed the  
37  
38 206 coordination of specific care pathways targeting the individual's needs (such as fall risk,  
39  
40 207 appropriate medication use, loneliness, and frailty). The usual care group received their usual  
41  
42 208 care and had access to any already existing services. At baseline, 30.2% of participants reported  
43  
44 209 having experienced a fall in the past 12 months. Their adjusted analysis found a small positive  
45  
46 210 effect of the UHCE approach on loneliness, as measured using the short De Jong Gierveld  
47  
48 211 Loneliness scale[21], when compared to usual care ( $B = -0.18, 95\% CI = -0.35 \text{ to } -0.02$ ).

1  
2  
3 212 Dolovich et al. (2019) conducted a randomized controlled trial comparing the  
4  
5 213 effectiveness of the Health TAPESTRY (Health Teams Advancing Patient Experience:  
6  
7 214 STRengthening qualitY) intervention compared to usual care in a sample of 312 older adults in  
8  
9  
10 215 Canada. This intervention involved the collection of information on patients' health goals and  
11  
12 216 needs by trained volunteers, who then summarized these findings in a report for the  
13  
14 217 interprofessional primary care team. The primary care team used these reports to generate and  
15  
16 218 act on plans of care for how the team, community agencies, and volunteers could help address  
17  
18 219 each patient's goals. The control group received usual care. Approximately 9.3% of participants  
19  
20 220 reported experiencing at least one fall. After 6 months of follow-up, they found no statistically  
21  
22 221 significant difference between the intervention and control groups in terms of their social  
23  
24 222 network scores (mean difference, 0.038 (95% CI: -0.25 to 0.33) and social satisfaction scores  
25  
26 223 (mean difference, 0.102 (95% CI, -0.35 to 0.55), as measured using the Duke Social Support  
27  
28 224 Index[22].  
29  
30  
31  
32  
33

## 34 225 **DISCUSSION**

35  
36 226 We conducted a comprehensive systematic review of interventions to mitigate social isolation  
37  
38 227 and loneliness in older adults living independently in a community setting who experienced a  
39  
40 228 fall. Very few studies were identified that fulfilled our eligibility criteria, indicating a dearth of  
41  
42 229 evidence on this important topic. Only 4 studies were included and as each examined different  
43  
44 230 types of interventions, this precluded any statistical pooling of results. Furthermore, studies  
45  
46 231 varied on the proportion of participants who reported experiencing a fall and multiple types of  
47  
48 232 outcomes were assessed for loneliness and social isolation, making it challenging to provide any  
49  
50 233 meaningful interpretation of results.  
51  
52  
53  
54  
55  
56  
57  
58  
59  
60

1  
2  
3 234 Across the four studies in this systematic review, only the quasi-experimental study by  
4  
5 235 Franse et al. (2018)[19], which assessed the impact of multifactorial health assessments and  
6  
7 236 coordinated care pathways targeting fall risk, medication use, loneliness and frailty, found a  
8  
9  
10 237 small positive effect on loneliness (i.e. reduction) when comparing those that received the  
11  
12 238 intervention with the control group. However, given the paucity of data in older adults with a  
13  
14 239 history of falling, the most effective intervention for preventing or reducing social isolation  
15  
16 240 remains unclear. Only one randomized controlled trial was identified in this review, highlighting  
17  
18 241 the need for more robust research in this important area.

19  
20  
21 242 Gardiner et al. (2016) conducted an integrative review on interventions for social  
22  
23 243 isolation in older adults[23]. While this review was not specific to individuals who had  
24  
25 244 experienced a fall, it discusses characteristics of effective social isolation interventions in the  
26  
27 245 broader older adult population and could be applicable to the subset of this population that  
28  
29 246 experiences falling. While the majority of interventions they identified showed at least a  
30  
31 247 moderate positive effect on social isolation or loneliness, they noted that the quality of the  
32  
33 248 evidence was poor, making it difficult to identify a particular intervention as most effective[23].  
34  
35 249 This is consistent with our determination of the need for more robust research on the  
36  
37 250 effectiveness of social isolation interventions in older adults with a history of falling. They  
38  
39 251 identified adaptability to local contexts, community participation in the design and  
40  
41 252 implementation of the intervention, and productive engagement (as opposed to passive activities)  
42  
43 253 as common features among successful interventions[23]. Future studies should consider these  
44  
45 254 factors in the development and evaluation of interventions for social isolation.  
46  
47  
48  
49  
50

51 255 Across our included studies, all four interventions appeared to be adapted to their local  
52  
53 256 contexts. The UHCE approach by Franse et al. (2018) and the Health TAPESTRY intervention  
54  
55  
56  
57  
58  
59  
60

1  
2  
3 257 by Dolovich et al. (2019) also involved strong community participation by tailoring their  
4  
5 258 intervention to each participant's health care needs, however it is unclear whether the subsequent  
6  
7 259 care pathways or plans allowed for productive engagement. Cohen et al. (2006)'s chorale  
8  
9  
10 260 intervention provided productive engagement to participants but may have benefited from further  
11  
12 261 community participation in the implementation of the intervention.  
13

14  
15 262 There are many strengths to our systematic review. Our search strategy was peer-  
16  
17 263 reviewed by a second librarian and was comprehensive through the inclusion of four databases,  
18  
19 264 searching grey literature and scanning references of included studies and relevant reviews. Our  
20  
21 265 methodology was informed by the Cochrane Handbook[10], with screening, data abstraction, and  
22  
23 266 risk of bias appraisal being conducted in duplicate by independent reviewers, and our findings  
24  
25  
26 267 were reported using PRISMA-2020[11]. However, there are some limitations. We deviated from  
27  
28 268 our protocol slightly to allow for inclusion of studies where only some participants had a history  
29  
30 269 of falling, given the paucity of data on older adults in a community setting who had experienced  
31  
32  
33 270 a fall. Further, studies were plagued by risk of bias across several components, including to risk  
34  
35 271 of bias from poor allocation concealment, lack of random sequence generation, and a lack of  
36  
37 272 blinding of participants, personnel, and outcome assessors. A lack of standardization was  
38  
39 273 observed across the outcomes assessed in the included studies, suggesting that future work could  
40  
41 274 focus on developing consensus on measures for social isolation and loneliness that have already  
42  
43 275 been validated to establish a core outcomes dataset. Indeed, a study by Cornwell et al. (2009)  
44  
45 276 highlights the wide variation in indicators for isolation and loneliness and proposed combining  
46  
47 277 these varying indicators to develop two parsimonious scales to measure social disconnectedness  
48  
49 278 and perceived isolation [24], however, these scales were not used by the included studies here.  
50  
51  
52  
53  
54  
55  
56  
57  
58  
59  
60



1  
2  
3 279 We recommend updating this systematic review as more literature becomes available on  
4  
5 280 this topic. Effective interventions are necessary to support older people who are at increased risk  
6  
7 281 of social isolation, particularly after experiencing a fall. In addition, further work is required to  
8  
9 282 examine the relationship between social isolation and falling, and the directionality of this  
10  
11 283 relationship, as different intervention approaches may be warranted depending on which  
12  
13 284 experience comes first.  
14  
15

16  
17 285 In conclusion, we identified four studies examining interventions for social isolation  
18  
19 286 amongst older adults with a history of falling. The interventions examined varied widely, from  
20  
21 287 singing in a chorale to community-base care coordination, as did the outcome measures used to  
22  
23 288 assess the effectiveness of the interventions. We identified only one quasi-experimental study  
24  
25 289 which demonstrated that multifactorial health assessments and coordinated care pathways  
26  
27 290 resulted in a small positive effect on loneliness in this population. Future research is warranted in  
28  
29 291 this under-studied area.  
30  
31  
32  
33  
34  
35  
36  
37  
38  
39  
40  
41  
42  
43  
44  
45  
46  
47  
48  
49  
50  
51  
52  
53  
54  
55  
56  
57  
58  
59  
60

1  
2  
3 292 **LIST OF ABBREVIATIONS**  
4

5 293 CADTH Canadian Agency for Drugs and Technologies in Health  
6  
7 294 CI Confidence interval  
8  
9 295 EPOC Effective Practice and Organisation of Care  
10  
11 296 IQR Interquartile range  
12  
13 297 PRESS Peer Review of Electronic Search Strategies  
14  
15 298 PRISMA Preferred Reporting Items for Systematic Reviews and Meta-Analyses  
16  
17 299 RCT Randomized controlled trial  
18  
19 300 SD Standard deviation  
20  
21  
22  
23  
24

25 301 **DECLARATIONS**  
26

27 302 Funding  
28

29 303 This work was funded through the SPOR Evidence Alliance. The SPOR Evidence Alliance is  
30  
31 304 supported by the Canadian Institutes of Health Research (CIHR) under Canada's Strategy for  
32  
33 305 Patient-Oriented Research (SPOR) initiative, and the generosity of partners from 41 public  
34  
35 306 agencies and organizations across Canada who have made cash or in-kind contributions. Dr.  
36  
37 307 Tricco is funded by a Tier 2 Canada Research Chair in Knowledge Synthesis, and Dr. Straus is  
38  
39 308 funded by a Tier 1 Canada Research Chair in Knowledge Translation.  
40  
41  
42

43 309 Acknowledgements  
44

45 310 We thank Jessie McGowan for developing our search strategies, Tamara Rader for peer  
46  
47 311 reviewing the search strategies (PRESS), and Alissa Epworth for running the searches, de-  
48  
49 312 duplicating results and obtaining full-text articles. We thank Joanne Bowater for her input during  
50  
51 313 earlier stages of the project. Finally, we thank Katrina Chiu and Navjot Mann for their support  
52  
53 314 with formatting the manuscript and creating tables and appendices.  
54  
55  
56  
57  
58  
59  
60

1  
2  
3 315 Ethics approval

4  
5 316 Not required.

6  
7  
8 317 Consent for publication

9  
10 318 Not applicable.

11  
12 319 Availability of data and materials

13  
14  
15 320 The full dataset is available from the corresponding author upon reasonable request.

16  
17 321 Conflict of interests

18  
19 322 All authors do not have any potential (or perceived) conflicts of interest.

20  
21 323 Role of the funder

22  
23 324 The funder had no role in the design and conduct of the study; collection, management, analysis,

24  
25 325 and interpretation of the data; preparation, review, or approval of the manuscript; or decision to

26  
27 326 submit the manuscript for publication.

28  
29  
30 327 **SUPPLEMENTAL FILES**

31  
32 328 Supplemental File 1: PRISMA Checklist

33  
34 329 Supplemental File 2: Appendices

35  
36 330 **FIGURES**

37  
38 331 Figure 1 – PRISMA study flow of included studies (n=4)

## TABLES

Table 1 – Study and Patient Characteristics

| <b>Summary characteristics</b>                                                                                          |                     |
|-------------------------------------------------------------------------------------------------------------------------|---------------------|
| Mean age (range)                                                                                                        | 77.8 (76 to 79.6)*  |
| Mean % of female participants (range)                                                                                   | 71.3 (60.8 to 91)** |
| Mean sample size (range)                                                                                                | 837.3 (21 to 2325)  |
| Mean % of participants living alone (range)                                                                             | 52.6 (38.1 to 67)*  |
| Mean % of participants with history of falling (range)                                                                  | 19.6 (9.3 to 30.2)* |
| <b>Individual study details</b>                                                                                         |                     |
| <b>Cohen, 2006 → Chorale intervention</b>                                                                               |                     |
| Country of conduct: United States                                                                                       |                     |
| Study design: Non-randomized controlled trial                                                                           |                     |
| Study duration: 12 months                                                                                               |                     |
| Sample size: 166                                                                                                        |                     |
| Intervention setting: Community                                                                                         |                     |
| <b>Scharlach, 2015 → ElderHelp Concierge Club (CC) intervention</b>                                                     |                     |
| Country of conduct: United States                                                                                       |                     |
| Study design: Uncontrolled before-after study                                                                           |                     |
| Study duration: 6 months                                                                                                |                     |
| Sample size: 21                                                                                                         |                     |
| Intervention setting: Participant homes and community                                                                   |                     |
| <b>Fransé, 2018 → Urban Health Centres Europe (UHCE) approach</b>                                                       |                     |
| Country of conduct: United Kingdom, Greece, Croatia, the Netherlands, Spain                                             |                     |
| Study design: Quasi-experimental (one site randomized, four sites controlled before-after)                              |                     |
| Study duration: 12 months                                                                                               |                     |
| Sample size: 2325                                                                                                       |                     |
| Intervention setting: Primary care and community settings                                                               |                     |
| <b>Dolovich, 2019 → Health TAPESTRY (Health Teams Advancing Patient Experience: STRengthening Quality) intervention</b> |                     |
| Country of conduct: Canada                                                                                              |                     |
| Study design: Randomized controlled trial                                                                               |                     |
| Study duration: 6 months                                                                                                |                     |
| Sample size: 312                                                                                                        |                     |
| Intervention setting: Participant homes and primary care                                                                |                     |

\*Only two of four studies reported on these variables

\*\*Only three of four studies reported on this variable

Table 2 – Screening Eligibility Criteria

|               |                                                                                                                                                                                                                                              |
|---------------|----------------------------------------------------------------------------------------------------------------------------------------------------------------------------------------------------------------------------------------------|
| Population    | Older adults (mean age 65 years and older) living independently in a community setting with a history of falling                                                                                                                             |
| Intervention  | Any intervention for social isolation                                                                                                                                                                                                        |
| Comparator    | Usual care or another intervention for social isolation                                                                                                                                                                                      |
| Outcomes      | Any quantitative measures of changes in social isolation<br>Ex: the quantity of social interactions, Lubben Social Network Scale for social isolation, De Jong Gierveld Loneliness Scale, Bude & Lantermann scale for social exclusion, etc. |
| Study designs | Randomized controlled trial (RCT), non-RCT, quasi-experimental, interrupted time series, controlled or uncontrolled before-after, case control studies, cohort studies                                                                       |
| Time          | No time restrictions                                                                                                                                                                                                                         |

## REFERENCES

1. WHO. Falls. 2018 [updated January 16, 2018]; Available from: <https://www.who.int/news-room/fact-sheets/detail/falls>.
2. Terroso M, Rosa N, Torres Marques A, Simoes R. Physical consequences of falls in the elderly: a literature review from 1995 to 2010. *European Review of Aging and Physical Activity*. 2014 2014/04/01;11(1):51-9.
3. Petersen N, König HH, Hajek A. The link between falls, social isolation and loneliness: A systematic review. *Arch Gerontol Geriatr*. 2020 May-Jun;88:104020.
4. Hajek A, König H-H. The association of falls with loneliness and social exclusion: evidence from the DEAS German Ageing Survey. *BMC Geriatr*. 2017;17(1):204-.
5. Nicholson Jr. NR. Social isolation in older adults: an evolutionary concept analysis. *Journal of Advanced Nursing*. 2009;65(6):1342-52.
6. Bu F, Abell J, Zaninotto P, Fancourt D. A longitudinal analysis of loneliness, social isolation and falls amongst older people in England. *Scientific reports*. 2020 Dec 10;10(1):20064.
7. Quach LT, Burr JA. Perceived social isolation, social disconnectedness and falls: the mediating role of depression. *Aging & mental health*. 2020 Mar 5:1-6.
8. Nicholson Jr NR. The relationship between injurious falls, fear of falling, social isolation and depression. 2005.
9. National Academies of Sciences E, Medicine. *Social Isolation and Loneliness in Older Adults: Opportunities for the Health Care System*. Washington, DC: The National Academies Press; 2020.
10. Higgins JPT TJ, Chandler J, Cumpston M, Li T, Page MJ, Welch VA. *Cochrane Handbook for Systematic Reviews of Interventions version 6.1*: Cochrane; 2020.
11. Page MJ, McKenzie JE, Bossuyt PM, Boutron I, Hoffmann TC, Mulrow CD, et al. Updating guidance for reporting systematic reviews: development of the PRISMA 2020 statement. *Journal of Clinical Epidemiology*. 2021.
12. McGowan J, Sampson M, Salzwedel DM, Cogo E, Foerster V, Lefebvre C. *PRESS Peer Review of Electronic Search Strategies: 2015 Guideline Statement*. *J Clin Epidemiol*. 2016 Jul;75:40-6.
13. Grey matters: a practical tool for searching health-related grey literature [Internet] Ottawa: CADTH; 2018; Available from: <https://www.cadth.ca/resources/finding-evidence>.
14. Gierveld JDJ, Tilburg TV. A 6-Item Scale for Overall, Emotional, and Social Loneliness: Confirmatory Tests on Survey Data. *Research on Aging*. 2006;28(5):582-98.
15. Bude H, Lantermann E-D. Soziale exklusion und exklusionsempfinden. *KZfSS Kölner Zeitschrift für Soziologie und Sozialpsychologie*. 2006;58(2):233-52.
16. Cochrane Effective Practice and Organisation of Care (EPOC). *EPOC Resources for review authors*. 2017; Available from: [https://epoc.cochrane.org/sites/epoc.cochrane.org/files/public/uploads/Resources-for-authors2017/suggested\\_risk\\_of\\_bias\\_criteria\\_for\\_epoc\\_reviews.pdf](https://epoc.cochrane.org/sites/epoc.cochrane.org/files/public/uploads/Resources-for-authors2017/suggested_risk_of_bias_criteria_for_epoc_reviews.pdf).
17. Cohen GD, Perlstein S, Chapline J, Kelly J, Firth KM, Simmens S. The impact of professionally conducted cultural programs on the physical health, mental health, and social functioning of older adults. *The Gerontologist*. 2006;46(6):726-34.
18. Scharlach AE, Graham CL, Berridge C. An integrated model of co-ordinated community-based care. *The Gerontologist*. 2015;55(4):677-87.

19. Franse CB, van Grieken A, Alhambra-Borrás T, Valía-Cotanda E, van Staveren R, Rentoumis T, et al. The effectiveness of a coordinated preventive care approach for healthy ageing (UHCE) among older persons in five European cities: a pre-post controlled trial. *International journal of nursing studies*. 2018;88:153-62.
20. Hughes ME, Waite LJ, Hawkey LC, Cacioppo JT. A Short Scale for Measuring Loneliness in Large Surveys: Results From Two Population-Based Studies. *Res Aging*. 2004;26(6):655-72.
21. De Jong Gierveld J, Van Tilburg T. The De Jong Gierveld short scales for emotional and social loneliness: tested on data from 7 countries in the UN generations and gender surveys. *Eur J Ageing*. 2010 Jun;7(2):121-30.
22. Wardian J, Robbins D, Wolfersteig W, Johnson T, Dustman P. Validation of the DSSI-10 to Measure Social Support in a General Population. *Research on Social Work Practice*. 2013 01/01;23.
23. Gardiner C, Geldenhuys G, Gott M. Interventions to reduce social isolation and loneliness among older people: an integrative review. *Health & Social Care in the Community*. 2018;26(2):147-57.
24. Cornwell EY, Waite LJ. Measuring social isolation among older adults using multiple indicators from the NSHAP study. *J Gerontol B Psychol Sci Soc Sci*. 2009;64 Suppl 1(Suppl 1):i38-i46.

Figure 1 – PRISMA study flow of included studies (n=4)

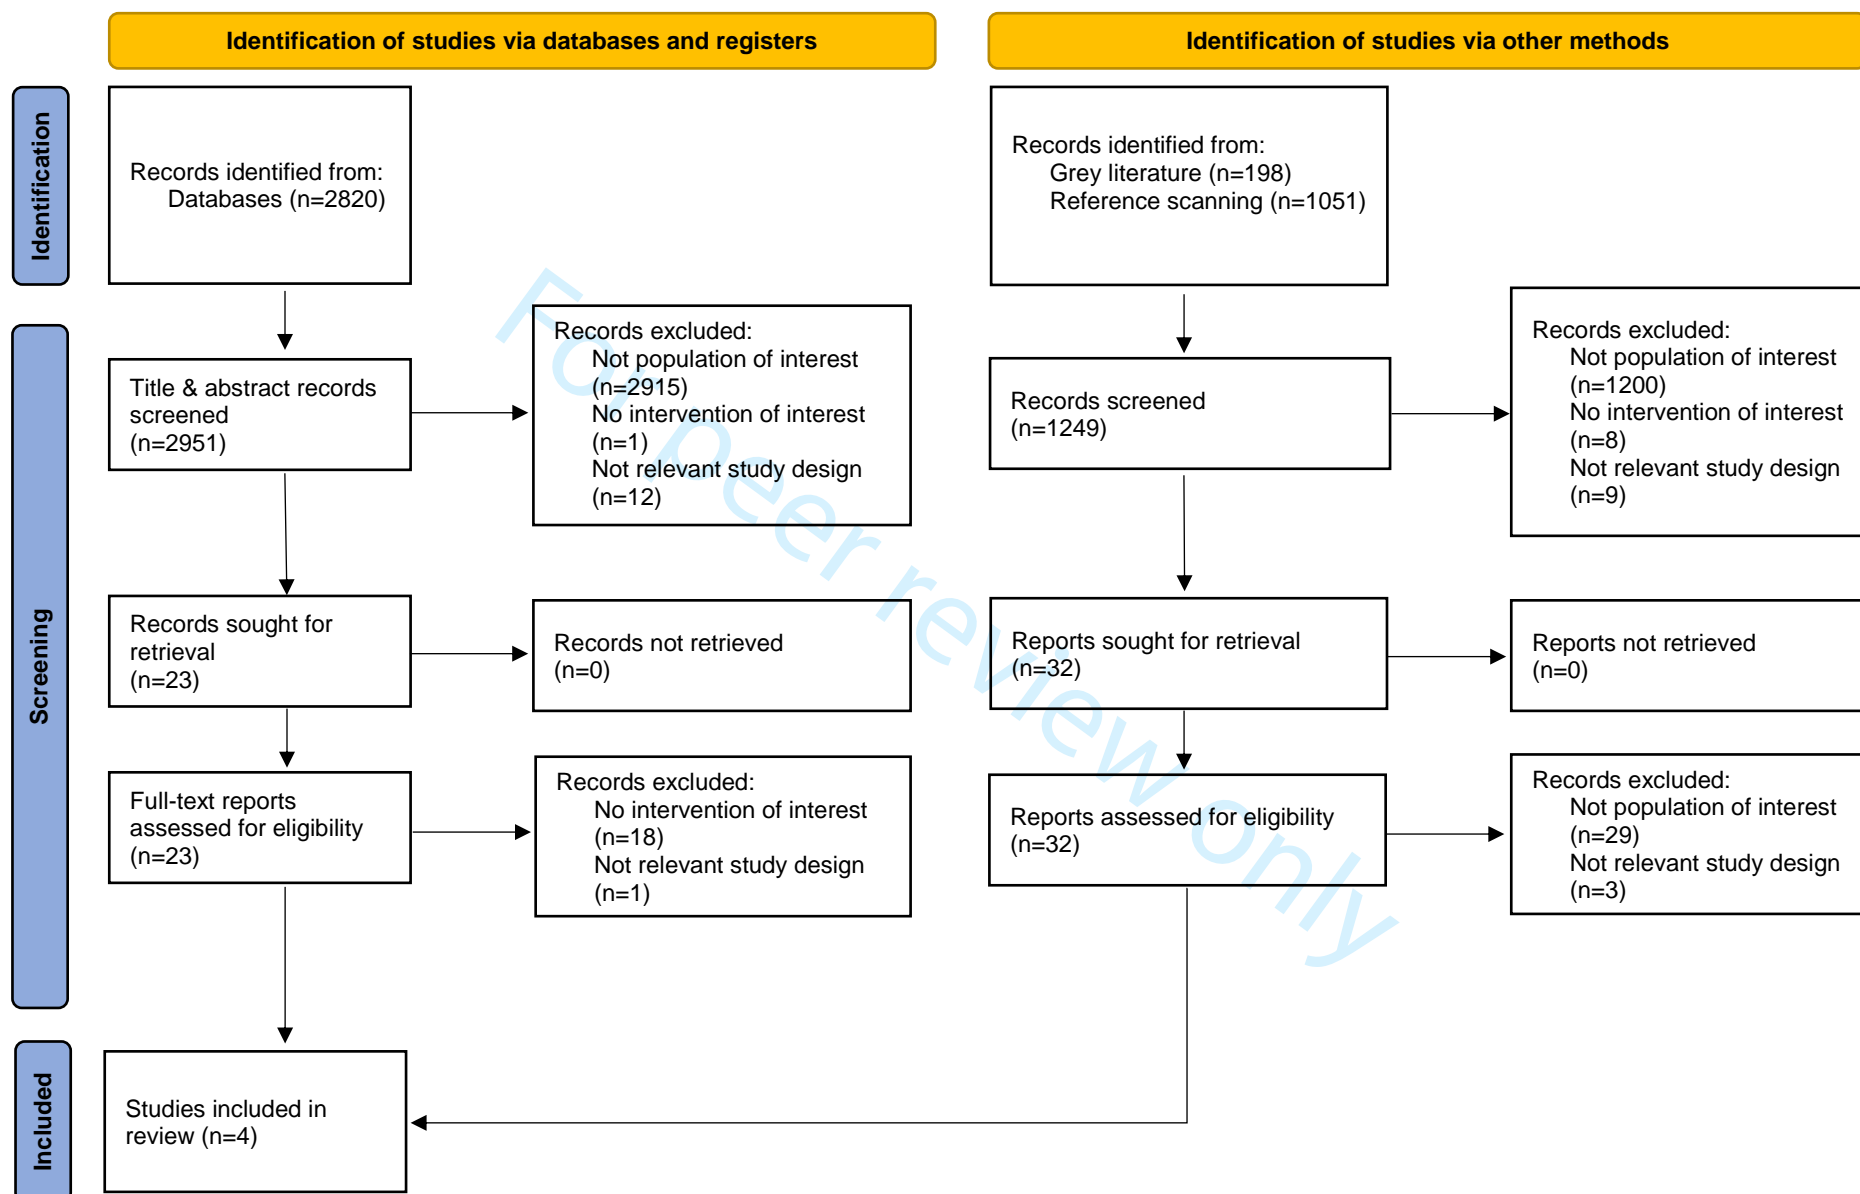



## Supplementary File 1: PRISMA Checklist

| Section and Topic             | Item # | Checklist item                                                                                                                                                                                                                                                                                       | Location where item is reported |
|-------------------------------|--------|------------------------------------------------------------------------------------------------------------------------------------------------------------------------------------------------------------------------------------------------------------------------------------------------------|---------------------------------|
| <b>TITLE</b>                  |        |                                                                                                                                                                                                                                                                                                      |                                 |
| Title                         | 1      | Identify the report as a systematic review.                                                                                                                                                                                                                                                          | 1                               |
| <b>ABSTRACT</b>               |        |                                                                                                                                                                                                                                                                                                      |                                 |
| Abstract                      | 2      | See the PRISMA 2020 for Abstracts checklist.                                                                                                                                                                                                                                                         | 3-4                             |
| <b>INTRODUCTION</b>           |        |                                                                                                                                                                                                                                                                                                      |                                 |
| Rationale                     | 3      | Describe the rationale for the review in the context of existing knowledge.                                                                                                                                                                                                                          | 5                               |
| Objectives                    | 4      | Provide an explicit statement of the objective(s) or question(s) the review addresses.                                                                                                                                                                                                               | 5                               |
| <b>METHODS</b>                |        |                                                                                                                                                                                                                                                                                                      |                                 |
| Eligibility criteria          | 5      | Specify the inclusion and exclusion criteria for the review and how studies were grouped for the syntheses.                                                                                                                                                                                          | 6, Table 2                      |
| Information sources           | 6      | Specify all databases, registers, websites, organisations, reference lists and other sources searched or consulted to identify studies. Specify the date when each source was last searched or consulted.                                                                                            | 6                               |
| Search strategy               | 7      | Present the full search strategies for all databases, registers and websites, including any filters and limits used.                                                                                                                                                                                 | Appendix 1                      |
| Selection process             | 8      | Specify the methods used to decide whether a study met the inclusion criteria of the review, including how many reviewers screened each record and each report retrieved, whether they worked independently, and if applicable, details of automation tools used in the process.                     | 7                               |
| Data collection process       | 9      | Specify the methods used to collect data from reports, including how many reviewers collected data from each report, whether they worked independently, any processes for obtaining or confirming data from study investigators, and if applicable, details of automation tools used in the process. | 7                               |
| Data items                    | 10a    | List and define all outcomes for which data were sought. Specify whether all results that were compatible with each outcome domain in each study were sought (e.g. for all measures, time points, analyses), and if not, the methods used to decide which results to collect.                        | 6-7                             |
|                               | 10b    | List and define all other variables for which data were sought (e.g. participant and intervention characteristics, funding sources). Describe any assumptions made about any missing or unclear information.                                                                                         | 7                               |
| Study risk of bias assessment | 11     | Specify the methods used to assess risk of bias in the included studies, including details of the tool(s) used, how many reviewers assessed each study and whether they worked independently, and if applicable, details of automation tools used in the process.                                    | 7                               |
| Effect measures               | 12     | Specify for each outcome the effect measure(s) (e.g. risk ratio, mean difference) used in the synthesis or presentation of results.                                                                                                                                                                  | N/A                             |
| Synthesis methods             | 13a    | Describe the processes used to decide which studies were eligible for each synthesis (e.g. tabulating the study intervention characteristics and comparing against the planned groups for each synthesis (item #5)).                                                                                 | 7                               |
|                               | 13b    | Describe any methods required to prepare the data for presentation or synthesis, such as handling of missing summary statistics, or data conversions.                                                                                                                                                | 7                               |
|                               | 13c    | Describe any methods used to tabulate or visually display results of individual studies and syntheses.                                                                                                                                                                                               | 7                               |

| Section and Topic             | Item # | Checklist item                                                                                                                                                                                                                                                                       | Location where item is reported |
|-------------------------------|--------|--------------------------------------------------------------------------------------------------------------------------------------------------------------------------------------------------------------------------------------------------------------------------------------|---------------------------------|
|                               | 13d    | Describe any methods used to synthesize results and provide a rationale for the choice(s). If meta-analysis was performed, describe the model(s), method(s) to identify the presence and extent of statistical heterogeneity, and software package(s) used.                          | 7                               |
|                               | 13e    | Describe any methods used to explore possible causes of heterogeneity among study results (e.g. subgroup analysis, meta-regression).                                                                                                                                                 | N/A                             |
|                               | 13f    | Describe any sensitivity analyses conducted to assess robustness of the synthesized results.                                                                                                                                                                                         | N/A                             |
| Reporting bias assessment     | 14     | Describe any methods used to assess risk of bias due to missing results in a synthesis (arising from reporting biases).                                                                                                                                                              | 7                               |
| Certainty assessment          | 15     | Describe any methods used to assess certainty (or confidence) in the body of evidence for an outcome.                                                                                                                                                                                | N/A                             |
| <b>RESULTS</b>                |        |                                                                                                                                                                                                                                                                                      |                                 |
| Study selection               | 16a    | Describe the results of the search and selection process, from the number of records identified in the search to the number of studies included in the review, ideally using a flow diagram.                                                                                         | 8, Figure 1                     |
|                               | 16b    | Cite studies that might appear to meet the inclusion criteria, but which were excluded, and explain why they were excluded.                                                                                                                                                          | N/A                             |
| Study characteristics         | 17     | Cite each included study and present its characteristics.                                                                                                                                                                                                                            | 9-11, Table 1, Appendix 2       |
| Risk of bias in studies       | 18     | Present assessments of risk of bias for each included study.                                                                                                                                                                                                                         | 9, Appendix 5                   |
| Results of individual studies | 19     | For all outcomes, present, for each study: (a) summary statistics for each group (where appropriate) and (b) an effect estimate and its precision (e.g. confidence/credible interval), ideally using structured tables or plots.                                                     | 9-11, Appendix 6                |
| Results of syntheses          | 20a    | For each synthesis, briefly summarise the characteristics and risk of bias among contributing studies.                                                                                                                                                                               | N/A                             |
|                               | 20b    | Present results of all statistical syntheses conducted. If meta-analysis was done, present for each the summary estimate and its precision (e.g. confidence/credible interval) and measures of statistical heterogeneity. If comparing groups, describe the direction of the effect. | N/A                             |
|                               | 20c    | Present results of all investigations of possible causes of heterogeneity among study results.                                                                                                                                                                                       | N/A                             |
|                               | 20d    | Present results of all sensitivity analyses conducted to assess the robustness of the synthesized results.                                                                                                                                                                           | N/A                             |
| Reporting biases              | 21     | Present assessments of risk of bias due to missing results (arising from reporting biases) for each synthesis assessed.                                                                                                                                                              | N/A                             |
| Certainty of evidence         | 22     | Present assessments of certainty (or confidence) in the body of evidence for each outcome assessed.                                                                                                                                                                                  | N/A                             |
| <b>DISCUSSION</b>             |        |                                                                                                                                                                                                                                                                                      |                                 |
| Discussion                    | 23a    | Provide a general interpretation of the results in the context of other evidence.                                                                                                                                                                                                    | 11-13                           |
|                               | 23b    | Discuss any limitations of the evidence included in the review.                                                                                                                                                                                                                      | 13                              |
|                               | 23c    | Discuss any limitations of the review processes used.                                                                                                                                                                                                                                | 13                              |
|                               | 23d    | Discuss implications of the results for practice, policy, and future research.                                                                                                                                                                                                       | 14                              |
| <b>OTHER INFORMATION</b>      |        |                                                                                                                                                                                                                                                                                      |                                 |

| Section and Topic                              | Item # | Checklist item                                                                                                                                                                                                                             | Location where item is reported |
|------------------------------------------------|--------|--------------------------------------------------------------------------------------------------------------------------------------------------------------------------------------------------------------------------------------------|---------------------------------|
| Registration and protocol                      | 24a    | Provide registration information for the review, including register name and registration number, or state that the review was not registered.                                                                                             | 2                               |
|                                                | 24b    | Indicate where the review protocol can be accessed, or state that a protocol was not prepared.                                                                                                                                             | 6                               |
|                                                | 24c    | Describe and explain any amendments to information provided at registration or in the protocol.                                                                                                                                            | 13                              |
| Support                                        | 25     | Describe sources of financial or non-financial support for the review, and the role of the funders or sponsors in the review.                                                                                                              | 15-16                           |
| Competing interests                            | 26     | Declare any competing interests of review authors.                                                                                                                                                                                         | 16                              |
| Availability of data, code and other materials | 27     | Report which of the following are publicly available and where they can be found: template data collection forms; data extracted from included studies; data used for all analyses; analytic code; any other materials used in the review. | 16                              |

From: Page MJ, McKenzie JE, Bossuyt PM, Boutron I, Hoffmann TC, Mulrow CD, et al. The PRISMA 2020 statement: an updated guideline for reporting systematic reviews. *BMJ* 2021;372:n71. doi: 10.1136/bmj.n71

For more information, visit: <http://www.prisma-statement.org/>

## Supplementary File 2: Appendices

|                                                                                                    |   |
|----------------------------------------------------------------------------------------------------|---|
| Appendix 1 – Database Search Strategies .....                                                      | 2 |
| Appendix 2 – Study Characteristics.....                                                            | 4 |
| Appendix 3 – Patient Characteristics.....                                                          | 5 |
| Appendix 4 – Overall risk of bias across included studies (n=4) .....                              | 7 |
| Appendix 5 – Quality appraisal assessments using Cochrane Risk of Bias tool modified by EPOC ..... | 8 |
| Appendix 6 – Outcome summary table for included studies (n=4).....                                 | 9 |

## Appendix 1 – Database Search Strategies

### Ovid MEDLINE(R) ALL <1946 to Feb 25, 2020>

1 Accidental Falls/  
 2 (slip\* or trip\* or stumbl\* or tumbl\*).tw,kf.  
 3 (fall\* or fell or "fall-related" or "near-fall").tw,kf.  
 4 or/1-3  
 5 limit 4 to "all aged (65 and over)"  
 6 exp Aged/ or geriatrics/  
 7 (geriatric\* or elder\* or age\* or "of age" or aging or senior\* or older  
 adult\* or retired or retiree\* or elder\* or pensioner\* or older people or older  
 patient\* or gerontology or Sexagenarian\* or septuagenarian\* or  
 octogenarian or nonagenarian\* or centenarian\* or sixties or seventies or  
 eighties or nineties).tw,kf.  
 8 4 and (6 or 7)  
 9 5 or 8  
 10 Social Isolation/  
 11 loneliness/  
 12 exp social support/  
 13 (social barrier\* or social isolat\* or social support\* or social car\* or  
 psychosocial support\* or psycho-social support\* or social frailt\* or  
 friendship\* or "social\* connected\*" or connectedness or lonely or loneliness  
 or "feel\* alone\*" or companionship).tw,kf.  
 14 ((lack or absence or minimi\*) adj2 (contact or communication or  
 support\*)),tw,kf.  
 15 or/10-14  
 16 9 and 15  
 17 animals/ not humans/  
 18 16 not 17

### PsycINFO <1806 to February Week 4 2020>

1 falls/  
 2 (slip\* or trip\* or stumbl\* or tumbl\*).tw.  
 3 (fall\* or fell or "fall-related" or "near-fall").tw.  
 4 or/1-3  
 5 limit 4 to "380 aged <age 65 yrs and older">  
 6 (geriatric\* or elder\* or age\* or "of age" or aging or senior\* or older  
 adult\* or retired or retiree\* or elder\* or pensioner\* or older people or older

patient\* or gerontology or Sexagenarian\* or septuagenarian\* or  
 octogenarian or nonagenarian\* or centenarian\* or sixties or seventies or  
 eighties or nineties).tw.  
 7 4 and 6  
 8 5 or 7  
 9 social isolation/ or loneliness/ or social support/ or friendship/  
 10 (social barrier\* or social isolat\* or social support\* or social car\* or  
 psychosocial support\* or psycho-social support\* or social frailt\* or  
 friendship\* or "social\* connected\*" or connectedness or lonely or loneliness  
 or "feel\* alone\*" or companionship).tw.  
 11 ((lack or absence or minimi\*) adj2 (contact or communication or  
 support\*)),tw.  
 12 or/9-11  
 13 8 and 12  
 14 Limit 13 to human

### Embase Classic+Embase <1947 to 2020 February 25>

1 falling/  
 2 (slip\* or trip\* or stumbl\* or tumbl\*).tw.  
 3 (fall\* or fell or "fall-related" or "near-fall").tw.  
 4 or/1-3  
 5 limit 4 to aged <65+ years>  
 6 loneliness/ or social support/ or friendship/  
 7 exp social isolation/  
 8 (social barrier\* or social isolat\* or social support\* or social car\* or  
 psychosocial support\* or psycho-social support\* or social frailt\* or  
 friendship\* or "social\* connected\*" or connectedness or lonely or loneliness  
 or "feel\* alone\*" or companionship).tw.  
 9 ((lack or absence or minimi\*) adj2 (contact or communication or  
 support\*)),tw.  
 10 or/6-9  
 11 5 and 10  
 12 limit 11 to human

### Database: EBM Reviews - Cochrane Database of Systematic Reviews <2005 to February 25, 2020>, EBM Reviews - ACP Journal Club <1991

**to February 2020>, EBM Reviews - Cochrane Clinical Answers  
<February 2020>, EBM Reviews - Database of Abstracts of Reviews of  
Effects <1st Quarter 2016>**

- 1 (slip\* or trip\* or stumbl\* or tumbl\*).mp.
- 2 (fall\* or fell or "fall-related" or "near-fall").mp.
- 3 1 or 2
- 4 (geriatric\* or elder\* or age\* or "of age" or aging or senior\* or older adult\* or retired or retiree\* or elder\* or pensioner\* or older people or older patient\* or gerontology or Sexagenarian\* or septuagenarian\* or octogenarian or nonagenarian\* or centenarian\* or sixties or seventies or eighties or nineties).mp.
- 5 3 and 4
- 6 (social barrier\* or social isolat\* or social support\* or social car\* or psychosocial support\* or psycho-social support\* or social frailt\* or friendship\* or "social\* connected\*" or connectedness or lonely or loneliness or "feel\* alone\*" or companionship).mp.
- 7 ((lack or absence or minimi\*) adj2 (contact or communication or support\*)).mp.
- 8 6 or 7
- 9 5 and 8

**Joanna Briggs Institute EBP Database - <Current to February 25,  
2020>**

- 1 (slip\* or trip\* or stumbl\* or tumbl\*).mp.
- 2 (fall\* or fell or "fall-related" or "near-fall").mp.
- 3 1 or 2
- 4 (geriatric\* or elder\* or age\* or "of age" or aging or senior\* or older adult\* or retired or retiree\* or elder\* or pensioner\* or older people or older patient\* or gerontology or Sexagenarian\* or septuagenarian\* or octogenarian or nonagenarian\* or centenarian\* or sixties or seventies or eighties or nineties).mp.
- 5 3 and 4
- 6 (social barrier\* or social isolation\* or social support\* or social car\* or psychosocial support\* or psycho-social support\* or social frailt\* or friendship\* or "social\* connected\*" or connectedness or lonely or loneliness or "feel\* alone\*" or companionship).mp.
- 7 ((lack or absence or minimi\*) adj2 (contact or communication or support\*)).mp.
- 8 6 or 7
- 9 5 and 8

**AMED (Allied and Complementary Medicine) <1985 to February  
2020>**

- 1 (slip\* or trip\* or stumbl\* or tumbl\*).mp.
- 2 (fall\* or fell or "fall-related" or "near-fall").mp.
- 3 1 or 2
- 4 (geriatric\* or elder\* or age\* or "of age" or aging or senior\* or older adult\* or retired or retiree\* or elder\* or pensioner\* or older people or older patient\* or gerontology or Sexagenarian\* or septuagenarian\* or octogenarian or nonagenarian\* or centenarian\* or sixties or seventies or eighties or nineties).mp.
- 5 3 and 4
- 6 (social barrier\* or social isolation\* or social support\* or social car\* or psychosocial support\* or psycho-social support\* or social frailt\* or friendship\* or "social\* connected\*" or connectedness or lonely or loneliness or "feel\* alone\*" or companionship).mp.
- 7 ((lack or absence or minimi\*) adj2 (contact or communication or support\*)).mp.
- 8 6 or 7
- 9 5 and 8

1  
2  
3  
4  
5  
6  
7  
8  
9  
10  
11  
12  
13  
14  
15  
16  
17  
18  
19  
20  
21  
22  
23  
24  
25  
26  
27  
28  
29  
30  
31  
32  
33  
34  
35  
36  
37  
38  
39  
40  
41  
42  
43  
44  
45  
46  
47

Appendix 2 – Study Characteristics

| Author, year    | Study title                                                                                                                                                    | Journal name                             | Country                                                 | Study design                                                                          | Study duration (months) |
|-----------------|----------------------------------------------------------------------------------------------------------------------------------------------------------------|------------------------------------------|---------------------------------------------------------|---------------------------------------------------------------------------------------|-------------------------|
| Cohen, 2006     | The impact of professionally conducted cultural programs on the physical health, mental health, and social functioning of older adults                         | The Gerontologist                        | United States                                           | Non-randomized controlled trial                                                       | 12                      |
| Scharlach, 2015 | An Integrated Model of Co-ordinated Community-Based Care                                                                                                       | The Gerontologist                        | United States                                           | Uncontrolled before-after study                                                       | 6                       |
| Fransse, 2018   | The effectiveness of a coordinated preventive care approach for healthy ageing (UHCE) among older persons in five European cities: A pre-post controlled trial | International Journal of Nursing Studies | United Kingdom, Greece, Croatia, the Netherlands, Spain | Quasi-experimental (one site was randomized, four sites were controlled before-after) | 12                      |
| Dolovich, 2019  | Combining volunteers and primary care teamwork to support health goals and needs of older adults: a pragmatic randomized controlled trial                      | Canadian Medical Association Journal     | Canada                                                  | Randomized controlled trial                                                           | 6                       |

## Appendix 3 – Patient Characteristics

| DEMOGRAPHICS            |                                                                      |                                                                                        |                                                                                                                                                                                                                                   |                            |                           |                            |                                        |                       |
|-------------------------|----------------------------------------------------------------------|----------------------------------------------------------------------------------------|-----------------------------------------------------------------------------------------------------------------------------------------------------------------------------------------------------------------------------------|----------------------------|---------------------------|----------------------------|----------------------------------------|-----------------------|
| Author, year            | Overall sample size                                                  | Overall age value                                                                      | Overall age type                                                                                                                                                                                                                  | Overall age variance value | Overall age variance type | % female*                  |                                        |                       |
| Cohen, 2006             | 166                                                                  | NR<br>(Reported mean age by group: intervention - 79.0 years, comparison - 79.6 years) | NR                                                                                                                                                                                                                                | NR                         | NR                        | NR                         |                                        |                       |
| Scharlach, 2015         | 21                                                                   | 76                                                                                     | median                                                                                                                                                                                                                            | NR                         | NR                        | 91                         |                                        |                       |
| Franse, 2018            | 2325                                                                 | 79.5                                                                                   | mean                                                                                                                                                                                                                              | 5.6                        | SD                        | 60.8                       |                                        |                       |
| Dolovich, 2019          | 312                                                                  | NR<br>(Reported mean age by group: intervention - 78.1 years, control - 79.1 years)    | NR                                                                                                                                                                                                                                | NR                         | NR                        | 62.2                       |                                        |                       |
| SETTING DATA            |                                                                      |                                                                                        |                                                                                                                                                                                                                                   |                            |                           |                            |                                        |                       |
| Author, year            | Intervention Setting                                                 | Participants living alone (%)                                                          | Description of access to caregivers                                                                                                                                                                                               |                            |                           |                            | Description of baseline social network |                       |
| Cohen, 2006             | Community                                                            | NR                                                                                     | NR                                                                                                                                                                                                                                |                            |                           |                            | NR                                     |                       |
| Scharlach, 2015         | Participant homes and community                                      | 67                                                                                     | NR                                                                                                                                                                                                                                |                            |                           |                            | NR                                     |                       |
| Franse, 2018            | Primary care and community settings                                  | 38.1                                                                                   | Care use i.e., hours per week receiving help in household work due to health problems and hours per week receiving help in caring for oneself was assessed. Hours/wk household help = control: 1.5 (5.3); intervention 1.0 (3.3). |                            |                           |                            | NR                                     |                       |
| Dolovich, 2019          | Participant homes and primary care                                   | NR                                                                                     | NR                                                                                                                                                                                                                                |                            |                           |                            | NR                                     |                       |
| FALLS AND FRAILITY DATA |                                                                      |                                                                                        |                                                                                                                                                                                                                                   |                            |                           |                            |                                        |                       |
| Author, year            | Participants with history of falling                                 | List of comorbidities                                                                  | Participants with frailty (%)                                                                                                                                                                                                     | Frailty scale              | Overall frailty score     | Overall frailty score type | Frailty variance value                 | Frailty variance type |
| Cohen, 2006             | baseline average falls per person - intervention: 0.40 control: 0.36 | NR                                                                                     | NR                                                                                                                                                                                                                                | NR                         | NR                        | NR                         | NR                                     | NR                    |



1  
2  
3  
4  
5  
6  
7  
8  
9  
10  
11  
12  
13  
14  
15  
16  
17  
18  
19  
20  
21  
22  
23  
24  
25  
26  
27  
28  
29  
30  
31  
32  
33  
34  
35  
36  
37  
38  
39  
40  
41  
42  
43  
44  
45  
46  
47

|                 |                                                      |    |      |                                 |     |      |     |    |
|-----------------|------------------------------------------------------|----|------|---------------------------------|-----|------|-----|----|
| Scharlach, 2015 | mean of 1.3 falls at baseline                        | NR | NR   | NR                              | NR  | NR   | NR  | NR |
| Franse, 2018    | 30.2% had a fall in the previous year                | NR | 20.2 | Tilburg Frailty indicator (TFI) | 5.1 | mean | 3.2 | SD |
| Dolovich, 2019  | 9.3% of participants had experienced 1 or more falls | NR | NR   | NR                              | NR  | NR   | NR  | NR |

**Abbreviations:** NR, not reported; SD, standard deviation  
 \*No studies reported having individuals who do not identify as female or male

For peer review only

Appendix 4 – Overall risk of bias across included studies (n=4)

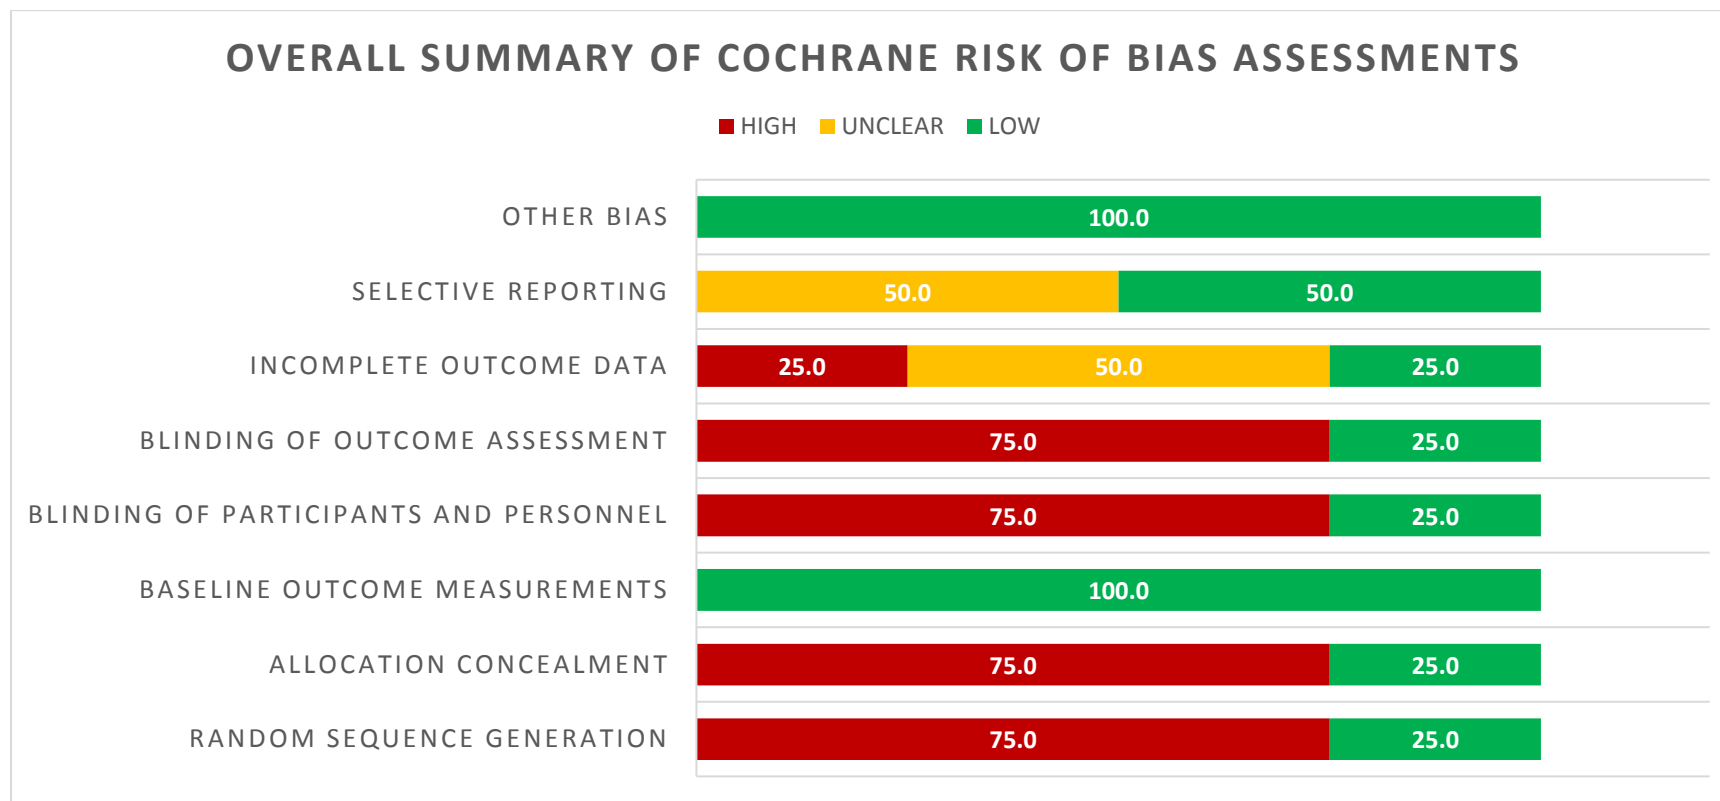

1  
2  
3  
4  
5  
6  
7  
8  
9  
10  
11  
12  
13  
14  
15  
16  
17  
18  
19  
20  
21  
22  
23  
24  
25  
26  
27  
28  
29  
30  
31  
32  
33  
34  
35  
36  
37  
38  
39  
40  
41  
42  
43  
44  
45  
46  
47

Appendix 5 – Quality appraisal assessments using Cochrane Risk of Bias tool modified by EPOC

| Author, Year    | Trial identifier | Random sequence generation | Allocation concealment | Baseline outcome measurements | Blinding of participants and personnel | Blinding of outcome assessment | Incomplete outcome data | Selective reporting | Other bias | Funding details:                                                                                                                                                                                                                                                                                                                                                                                          |
|-----------------|------------------|----------------------------|------------------------|-------------------------------|----------------------------------------|--------------------------------|-------------------------|---------------------|------------|-----------------------------------------------------------------------------------------------------------------------------------------------------------------------------------------------------------------------------------------------------------------------------------------------------------------------------------------------------------------------------------------------------------|
| Cohen, 2006     | NR               | High risk                  | High risk              | Low risk                      | High risk                              | High risk                      | Unclear risk            | Unclear risk        | Low risk   | National Endowment for the Arts (lead sponsor); Center for Mental Health Services, Substance Abuse and Mental Health Services Administration, Department of Health and Human Services; National Institute of Mental Health, National Institutes of Health; National Retired Teachers Association/AARP; International Foundation for Music Research; Stella and Charles Guttman Foundation, New York City. |
| Scharlach, 2015 | NR               | High risk                  | High risk              | High risk                     | High risk                              | High risk                      | Unclear risk            | Unclear risk        | Low risk   | The SCAN Foundation                                                                                                                                                                                                                                                                                                                                                                                       |
| Franse, 2018    | NR               | High risk                  | High risk              | Low risk                      | High risk                              | High risk                      | High risk               | Low risk            | Low risk   | European Union, CHAFEA, third Health programme, grant number 20131201                                                                                                                                                                                                                                                                                                                                     |
| Dolovich, 2019  | NCT02283723      | Low risk                   | Low risk               | Low risk                      | Low risk                               | Low risk                       | Low risk                | Low risk            | Low risk   | Health Canada (grant no. 6817-06-2013/5570001), Government of Ontario (grant no. 06547 for INSPIRE-PHC), McMaster University & McMaster Family Health Organization                                                                                                                                                                                                                                        |

## Appendix 6 – Outcome summary table for included studies (n=4)

| Author, Year                                                    | Treatment arms                                                                                                                                                                                                                                                                                                                                                                                                                                                                                                                                                                                                                                                                          | History of falls                                                                                                                    | Results                                                                                                                                                                                                                                                                                                                                                                    | Text description of effectiveness                                                                                                                                                                                                                                                                                                                                     |
|-----------------------------------------------------------------|-----------------------------------------------------------------------------------------------------------------------------------------------------------------------------------------------------------------------------------------------------------------------------------------------------------------------------------------------------------------------------------------------------------------------------------------------------------------------------------------------------------------------------------------------------------------------------------------------------------------------------------------------------------------------------------------|-------------------------------------------------------------------------------------------------------------------------------------|----------------------------------------------------------------------------------------------------------------------------------------------------------------------------------------------------------------------------------------------------------------------------------------------------------------------------------------------------------------------------|-----------------------------------------------------------------------------------------------------------------------------------------------------------------------------------------------------------------------------------------------------------------------------------------------------------------------------------------------------------------------|
| Cohen, 2006<br><br><i>Design: non-RCT</i>                       | <p><b>Singing in a chorale</b> (n=90)<br/>The intervention consisted of participating in a professionally conducted chorale in which there were weekly singing rehearsals for 30 weeks as well as public performances several times during the intervention period.</p> <p><b>Usual activities</b> (n=76)<br/>Participants in the comparison group continued their regular activities as usual, with the study introducing no changes other than the assessments.</p>                                                                                                                                                                                                                   | Baseline average of 0.40 falls per person in the intervention group, and 0.36 per person in the control group in the past 12 months | <p><b>UCLA Loneliness scale III</b><br/>Baseline: 35.1 (SD, 8.1)<br/>Follow-up: 34.6 (SD, 7.9)</p> <p>Baseline: 38.3 (SD, 10.1)<br/>Follow-up: 37.0 (SD, 10.3)</p>                                                                                                                                                                                                         | Both groups evidenced a slight decrease in loneliness at the 12-month follow-up; however, the decrease in loneliness was greater for the intervention group than for the comparison. Analysis of covariance of the 12-month follow-up assessment continued to demonstrate a marginally significant difference between the two groups, $F(1,126) = 3.08$ ; $p = .08$ . |
| Scharlach, 2015<br><br><i>Design: Uncontrolled before-after</i> | <p><b>ElderHelp Concierge Club (CC)</b> (n=21)<br/>Integrated community-based care model that includes comprehensive personal and environmental, assessment, multilevel care co-ordination, a mix of professional and volunteer service providers, and a capitated, income-adjusted fee model. When individuals contact CC for information or services, they receive a brief assessment designed to determine their eligibility for CC services, as well as the type of services they appear to need: information and referral services only (Tier 1), transportation services only, or other CC services including in-home assessment by the CC Intake Specialist (Tiers 2 and 3).</p> | Baseline mean of 1.3 falls over the past 6 months                                                                                   | <p><b>Social Isolation (3-item scale)</b><br/>Baseline: 8.7 (SD, 3.2)<br/>Follow-up: 7.0 (SD, 3.8)</p> <p><b>Social interaction</b><br/><i>Interact with friends/relatives weekly</i><br/>Baseline: 76% of participants<br/>Follow-up: 100% of participants</p> <p><i>Attend monthly meetings</i><br/>Baseline: 33% of participants<br/>Follow-up: 48% of participants</p> | Social isolation did not change significantly; nor did contact with friends and relatives or participation in meetings of organized groups.                                                                                                                                                                                                                           |

|                                                                                                                                                                                                                                                                                                  |                                                                                                                                                                                                                                                                                                                                                                                                                                                                                                                                                                                                                                                                                                                                                                                                                                                                                                                                                                              |                                                                      |                                                                                                                                                                                                                                                                                                                                                                                                                                                                                                       |                                                                                                                                                                                                                                                                                                          |
|--------------------------------------------------------------------------------------------------------------------------------------------------------------------------------------------------------------------------------------------------------------------------------------------------|------------------------------------------------------------------------------------------------------------------------------------------------------------------------------------------------------------------------------------------------------------------------------------------------------------------------------------------------------------------------------------------------------------------------------------------------------------------------------------------------------------------------------------------------------------------------------------------------------------------------------------------------------------------------------------------------------------------------------------------------------------------------------------------------------------------------------------------------------------------------------------------------------------------------------------------------------------------------------|----------------------------------------------------------------------|-------------------------------------------------------------------------------------------------------------------------------------------------------------------------------------------------------------------------------------------------------------------------------------------------------------------------------------------------------------------------------------------------------------------------------------------------------------------------------------------------------|----------------------------------------------------------------------------------------------------------------------------------------------------------------------------------------------------------------------------------------------------------------------------------------------------------|
| <p>1<br/>2<br/>3<br/>4<br/>5<br/>6<br/>7<br/>8<br/>9<br/>10<br/>11<br/>12<br/>13</p> <p>Franse, 2018</p> <p><i>Design: one site randomized, 4 sites controlled before-after design; results combined all sites, so classified as quasi-experimental</i></p>                                      | <p><b>Urban Health Centres Europe (UHCE) approach</b> (n=986)<br/>Preventive multidimensional health assessment and if person at risk, coordinated care pathways targeted at fall risk, appropriate medication use, loneliness and frailty</p> <p><b>Usual Care</b> (n=858)<br/>Usual care included access to their GP</p>                                                                                                                                                                                                                                                                                                                                                                                                                                                                                                                                                                                                                                                   | <p>30.2% of participants experienced a fall in the previous year</p> | <p><b>Loneliness (short JG scale)</b><br/>Baseline: 0.6 (SD, 0.7)<br/>Follow-up: 0.6 (SD, 0.7)</p> <p>Baseline: 0.6 (SD, 0.7)<br/>Follow-up: 0.7 (SD, 0.7)</p>                                                                                                                                                                                                                                                                                                                                        | <p>When comparing persons who enrolled in any type of care-pathway with all persons in the control group there was a positive effect on loneliness after adjusting for city clustering, age, gender, living situation, education, and baseline status of outcome (B= -0.18, 95% CI= -0.35 to -0.02).</p> |
| <p>14<br/>15<br/>16<br/>17<br/>18<br/>19<br/>20<br/>21<br/>22<br/>23<br/>24<br/>25<br/>26<br/>27<br/>28<br/>29<br/>30<br/>31<br/>32<br/>33<br/>34<br/>35<br/>36<br/>37<br/>38<br/>39<br/>40<br/>41<br/>42<br/>43<br/>44<br/>45<br/>46<br/>47</p> <p>Dolovich, 2019</p> <p><i>Design: RCT</i></p> | <p><b>Health TAPESTRY (Health Teams Advancing Patient Experience: STrengthening Quality) intervention</b> (n=158)<br/>Trained community volunteers visited patients to collect information on their life and health goals, risks and needs, daily life activities and general health, using structured surveys and unstructured narratives. The volunteers sent a report summarizing patients’ goals, alerts, key issues and observations to the primary care interprofessional “huddle” team at the clinics. These interprofessional teams reviewed the reports and then generated, prioritized and acted upon plans of care for how the team, community agencies and volunteers could address clients’ goals and health issues, with iterative follow-up</p> <p><b>Usual Care</b> (n=154)<br/>The control group received usual care and did not have volunteer visits. There was no restriction on receiving care from the same team members as the intervention group</p> | <p>9.3% of participants experienced 1 or more falls</p>              | <p><b>Social network score (DSSI-10)</b><br/>Baseline: Mean, 8.84 (SD, 1.52)<br/>Follow-up: Mean, 8.75 (SD, 1.52)</p> <p><b>Social satisfaction score (DSSI-10)</b><br/>Baseline: Mean, 18.89 (SD, 2.41)<br/>Follow-up: Mean, 18.96 (SD, 2.87)</p> <p><b>Social network score (DSSI-10)</b><br/>Baseline: Mean, 8.74 (SD, 1.61)<br/>Follow-up: Mean, 8.69 (SD, 1.53)</p> <p><b>Social satisfaction score (DSSI-10)</b><br/>Baseline: Mean, 19.19 (SD, 2.37)<br/>Follow-up: Mean, 19.04 (SD, 2.76)</p> | <p>There were no statistically significant between-group differences in participant ratings of self-efficacy, quality of life, optimal aging, social support</p>                                                                                                                                         |

# BMJ Open

## Interventions for social isolation in older adults who have experienced a fall: A systematic review

|                                 |                                                                                                                                                                                                                                                                                                                                                                                                                                                                                                                                                                                                                                                                                                                                                                                                                                                                                                                                                                                                                                                                                                                                                                                                                                                                                                                                                                                                                                                                                                                                                                                                                       |
|---------------------------------|-----------------------------------------------------------------------------------------------------------------------------------------------------------------------------------------------------------------------------------------------------------------------------------------------------------------------------------------------------------------------------------------------------------------------------------------------------------------------------------------------------------------------------------------------------------------------------------------------------------------------------------------------------------------------------------------------------------------------------------------------------------------------------------------------------------------------------------------------------------------------------------------------------------------------------------------------------------------------------------------------------------------------------------------------------------------------------------------------------------------------------------------------------------------------------------------------------------------------------------------------------------------------------------------------------------------------------------------------------------------------------------------------------------------------------------------------------------------------------------------------------------------------------------------------------------------------------------------------------------------------|
| Journal:                        | <i>BMJ Open</i>                                                                                                                                                                                                                                                                                                                                                                                                                                                                                                                                                                                                                                                                                                                                                                                                                                                                                                                                                                                                                                                                                                                                                                                                                                                                                                                                                                                                                                                                                                                                                                                                       |
| Manuscript ID                   | bmjopen-2021-056540.R1                                                                                                                                                                                                                                                                                                                                                                                                                                                                                                                                                                                                                                                                                                                                                                                                                                                                                                                                                                                                                                                                                                                                                                                                                                                                                                                                                                                                                                                                                                                                                                                                |
| Article Type:                   | Original research                                                                                                                                                                                                                                                                                                                                                                                                                                                                                                                                                                                                                                                                                                                                                                                                                                                                                                                                                                                                                                                                                                                                                                                                                                                                                                                                                                                                                                                                                                                                                                                                     |
| Date Submitted by the Author:   | 14-Jan-2022                                                                                                                                                                                                                                                                                                                                                                                                                                                                                                                                                                                                                                                                                                                                                                                                                                                                                                                                                                                                                                                                                                                                                                                                                                                                                                                                                                                                                                                                                                                                                                                                           |
| Complete List of Authors:       | Tricco, Andrea; St Michael's Hospital Li Ka Shing Knowledge Institute, Knowledge Translation Program; University of Toronto Dalla Lana School of Public Health, Epidemiology Division and Institute for Health, Management, and Evaluation<br>Thomas, Sonia; St Michael's Hospital Li Ka Shing Knowledge Institute, Knowledge Translation Program<br>Radhakrishnan, Amruta; St Michael's Hospital Li Ka Shing Knowledge Institute, Knowledge Translation Program<br>Ramkissoon, Naveeta; St Michael's Hospital Li Ka Shing Knowledge Institute, Knowledge Translation Program<br>Mitchell, Gary; Queen's University Belfast,<br>Fortune, Jennifer; RCSI University of Medicine and Health Sciences, Department of Public Health and Epidemiology<br>Jiang, Ying; Public Health Agency of Canada, Applied Research Division<br>de Groh, Margaret; Public Health Agency of Canada, Applied Research Division<br>Anderson, Kerry; Public Health Agency of Canada, Centre for Health Promotion<br>Barker, Joan; St Michael's Hospital Li Ka Shing Knowledge Institute, Knowledge Translation Program<br>Gauthier-Beaupré, Amélie; Public Health Agency of Canada, Centre for Health Promotion; University of Ottawa, Faculty of Health Sciences<br>Watt, Jennifer; St Michael's Hospital Li Ka Shing Knowledge Institute, Knowledge Translation Program; University of Toronto Faculty of Medicine, Department of Geriatric Medicine<br>Straus, Sharon; St Michael's Hospital Li Ka Shing Knowledge Institute, Knowledge Translation Program; University of Toronto Faculty of Medicine, Department of Geriatric Medicine |
| <b>Primary Subject Heading</b>: | Geriatric medicine                                                                                                                                                                                                                                                                                                                                                                                                                                                                                                                                                                                                                                                                                                                                                                                                                                                                                                                                                                                                                                                                                                                                                                                                                                                                                                                                                                                                                                                                                                                                                                                                    |
| Secondary Subject Heading:      | Rehabilitation medicine                                                                                                                                                                                                                                                                                                                                                                                                                                                                                                                                                                                                                                                                                                                                                                                                                                                                                                                                                                                                                                                                                                                                                                                                                                                                                                                                                                                                                                                                                                                                                                                               |
| Keywords:                       | REHABILITATION MEDICINE, GERIATRIC MEDICINE, PREVENTIVE MEDICINE                                                                                                                                                                                                                                                                                                                                                                                                                                                                                                                                                                                                                                                                                                                                                                                                                                                                                                                                                                                                                                                                                                                                                                                                                                                                                                                                                                                                                                                                                                                                                      |
|                                 |                                                                                                                                                                                                                                                                                                                                                                                                                                                                                                                                                                                                                                                                                                                                                                                                                                                                                                                                                                                                                                                                                                                                                                                                                                                                                                                                                                                                                                                                                                                                                                                                                       |

1  
2  
3  
4  
5  
6  
7  
8  
9  
10  
11  
12  
13  
14  
15  
16  
17  
18  
19  
20  
21  
22  
23  
24  
25  
26  
27  
28  
29  
30  
31  
32  
33  
34  
35  
36  
37  
38  
39  
40  
41  
42  
43  
44  
45  
46  
47  
48  
49  
50  
51  
52  
53  
54  
55  
56  
57  
58  
59  
60

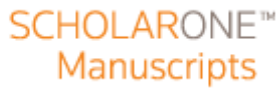



I, the Submitting Author has the right to grant and does grant on behalf of all authors of the Work (as defined in the below author licence), an exclusive licence and/or a non-exclusive licence for contributions from authors who are: i) UK Crown employees; ii) where BMJ has agreed a CC-BY licence shall apply, and/or iii) in accordance with the terms applicable for US Federal Government officers or employees acting as part of their official duties; on a worldwide, perpetual, irrevocable, royalty-free basis to BMJ Publishing Group Ltd ("BMJ") its licensees and where the relevant Journal is co-owned by BMJ to the co-owners of the Journal, to publish the Work in this journal and any other BMJ products and to exploit all rights, as set out in our [licence](#).

The Submitting Author accepts and understands that any supply made under these terms is made by BMJ to the Submitting Author unless you are acting as an employee on behalf of your employer or a postgraduate student of an affiliated institution which is paying any applicable article publishing charge ("APC") for Open Access articles. Where the Submitting Author wishes to make the Work available on an Open Access basis (and intends to pay the relevant APC), the terms of reuse of such Open Access shall be governed by a Creative Commons licence – details of these licences and which [Creative Commons](#) licence will apply to this Work are set out in our licence referred to above.

Other than as permitted in any relevant BMJ Author's Self Archiving Policies, I confirm this Work has not been accepted for publication elsewhere, is not being considered for publication elsewhere and does not duplicate material already published. I confirm all authors consent to publication of this Work and authorise the granting of this licence.



1  
2  
3 **1 Interventions for social isolation in older adults who have experienced a fall:**

4  
5  
6 **2 A systematic review**

- 7  
8 3 Andrea C. Tricco<sup>1,2\*</sup> email: [Andrea.Tricco@unityhealth.to](mailto:Andrea.Tricco@unityhealth.to)
- 9  
10 4 Sonia M. Thomas<sup>1</sup> email: [Sonia.Thomas@unityhealth.to](mailto:Sonia.Thomas@unityhealth.to)
- 11  
12 5 Amruta Radhakrishnan<sup>1</sup> email: [Amruta.Radhakrishnan@unityhealth.to](mailto:Amruta.Radhakrishnan@unityhealth.to)
- 13  
14 6 Naveeta Ramkissoon<sup>1</sup> email: [Naveeta.Ramkissoon@unityhealth.to](mailto:Naveeta.Ramkissoon@unityhealth.to)
- 15  
16 7 Gary Mitchell<sup>3</sup> email: [Gary.Mitchell@qub.ac.uk](mailto:Gary.Mitchell@qub.ac.uk)
- 17  
18 8 Jennifer Fortune<sup>4</sup> email: [jenniferfortune@rcsi.ie](mailto:jenniferfortune@rcsi.ie)
- 19  
20 9 Ying Jiang<sup>5</sup> email: [ying.jiang@canada.ca](mailto:ying.jiang@canada.ca)
- 21  
22 10 Margaret de Groh<sup>5</sup> email: [margaret.degroh@canada.ca](mailto:margaret.degroh@canada.ca)
- 23  
24 11 Kerry Anderson<sup>6</sup> email: [kerry.anderson3@canada.ca](mailto:kerry.anderson3@canada.ca)
- 25  
26 12 Joan Barker<sup>1</sup> email: [joanbarker@rogers.com](mailto:joanbarker@rogers.com)
- 27  
28 13 Amélie Gauthier-Beaupré<sup>6,7</sup> email: [amelie.gauthier-beaupre@canada.ca](mailto:amelie.gauthier-beaupre@canada.ca)
- 29  
30 14 Jennifer Watt<sup>1,8</sup> email: [Jennifer.Watt@unityhealth.to](mailto:Jennifer.Watt@unityhealth.to)
- 31  
32 15 Sharon E. Straus<sup>1,8</sup> email: [Sharon.Straus@utoronto.ca](mailto:Sharon.Straus@utoronto.ca)
- 33  
34 16 <sup>1</sup>Li Ka Shing Knowledge Institute, St. Michael's Hospital, 209 Victoria Street, East Building,  
35  
36 Toronto, Ontario, M5B 1W8, Canada
- 37  
38 18 <sup>2</sup>Epidemiology Division and Institute for Health, Management, and Evaluation, Dalla Lana  
39  
40 School of Public Health, University of Toronto, Toronto, Ontario, Canada
- 41  
42 19 <sup>3</sup>School of Nursing and Midwifery, Queen's University Belfast, Belfast, Ireland
- 43  
44 20 <sup>4</sup>Department of Public Health and Epidemiology, RCSI University of Medicine and Health  
45  
46 Sciences, Dublin, Ireland
- 47  
48  
49  
50  
51  
52  
53  
54  
55  
56  
57  
58  
59  
60

1  
2  
3 23 <sup>5</sup>Centre for Surveillance and Applied Research, Public Health Agency of Canada, Ottawa,  
4  
5 24 Ontario, Canada

6  
7  
8 25 <sup>6</sup>Centre for Health Promotion, Public Health Agency of Canada, Ottawa, Ontario, Canada

9  
10 26 <sup>7</sup>Faculty of Health Sciences, University of Ottawa, Ottawa, Ontario, Canada

11  
12 27 <sup>8</sup>Department of Geriatric Medicine, University of Toronto, Toronto, Ontario, Canada

13  
14  
15 28 **\*Corresponding Author:**

16  
17 29 Dr. Andrea C. Tricco, PhD, MSc

18  
19 30 Scientist and Director of the Knowledge Synthesis Team,

20  
21 31 Knowledge Translation Program, Li Ka Shing Knowledge Institute, St. Michael's Hospital

22  
23 32 209 Victoria Street, East Building, Toronto, Ontario, M5B 1W8, Canada

24  
25 33 Phone: (416) 864-6060 ext. 77521, Fax: (416) 864-6057, Email: [Andrea.Tricco@unityhealth.to](mailto:Andrea.Tricco@unityhealth.to)

1  
2  
3 34 **ABSTRACT**  
4

5 35 **Objectives:** The objective of our systematic review was to identify effective interventions to  
6  
7  
8 36 prevent or mitigate social isolation and/or loneliness in older adults who experienced a fall.  
9

10 37 **Design:** Systematic review  
11

12 38 **Data Sources:** MEDLINE, Embase, the Cochrane Central Register of Controlled Trials, and  
13  
14  
15 39 Ageline were searched (inception to February 2020).  
16

17 40 **Methods:** Studies were eligible if they described any intervention for social isolation in older  
18  
19 41 adults living in a community setting who experienced a fall, and reported outcomes related to  
20  
21 42 social isolation or loneliness.  
22

23  
24 43 Two independent reviewers screened citations, abstracted data, and appraised risk of bias using  
25  
26 44 the Cochrane risk-of-bias tool. The results were summarized descriptively.  
27

28 45 **Results:** After screening 4,069 citations and 55 full-text articles, 4 studies were included. The  
29  
30 46 four studies varied in study design, including a randomized controlled trial, non-randomized  
31  
32 47 controlled trial, an uncontrolled before-after study, and a quasi-experimental study. Interventions  
33  
34 48 varied widely, and included singing in a choir, a patient-centred, interprofessional primary care  
35  
36 49 team-based approach, a multifactorial assessment targeting fall risk, appropriate medication use,  
37  
38 50 loneliness and frailty, and a community-based care model that included comprehensive  
39  
40 51 assessments and multilevel care coordination. Outcome measures varied and included scales for  
41  
42 52 loneliness, social isolation, social interaction, social networks, and social satisfaction. Mixed  
43  
44 53 results were found, with three studies reporting no differences in social isolation or loneliness  
45  
46 54 after the intervention. Only the multifactorial assessment intervention demonstrated a small  
47  
48 55 positive effect on loneliness compared to the control group after adjustment (B= -0.18, 95% CI=  
49  
50  
51  
52  
53  
54 56 -0.35 to -0.02).  
55  
56  
57  
58  
59  
60

1  
2  
3 57 **Conclusions:** Few studies examined interventions for social isolation or loneliness in older  
4  
5 58 adults who experienced a fall. More research is warranted in this area.  
6  
7

8 59 **Systematic Review Registration:** PROSPERO (CRD42020198487)  
9

10 60 **Word count:** 266 (abstract), 2953 (main text)  
11

12 61 **Keywords:** systematic review, older adults, falling, social isolation, loneliness, interventions  
13  
14

15 62 **Strengths and limitations of this study:**  
16

- 17 63 • We conducted a comprehensive search of 4 databases, using a search strategy which was  
18  
19 64 peer-reviewed by a second librarian, and supplemented this by searching grey literature  
20  
21 65 and scanning references of included studies and relevant reviews.  
22  
23  
24 66 • We followed the methodology outlined by the Cochrane Handbook, with screening, data  
25  
26 67 abstraction, and risk of bias appraisal being conducted in duplicate by independent  
27  
28 68 reviewers, and our findings were reported using the PRISMA-2020 checklist.  
29  
30  
31 69 • We deviated from our protocol slightly due to the limited of data on older adults in a  
32  
33 70 community setting who had experienced a fall and expanded our inclusion criteria to  
34  
35 71 include studies where some participants (not all) had a history of falling.  
36  
37  
38 72 • Our included studies were plagued by risk of bias across several components, including  
39  
40 73 poor allocation concealment, lack of random sequence generation, and a lack of blinding  
41  
42 74 of participants, personnel, and outcome assessors.  
43  
44  
45 75 • A lack of standardization was observed across the outcomes assessed in the included  
46  
47 76 studies, due to lack of consensus on measures for social isolation and loneliness.  
48  
49  
50  
51  
52  
53  
54  
55  
56  
57  
58  
59  
60

## 77 INTRODUCTION

78 Worldwide, more than 37 million falls occur requiring medical attention every year(1). Almost  
79 650,000 people die every year from a fall, with those aged 65 years and older experiencing the  
80 greatest number of fatal falls(1). Falls are associated with considerable negative outcomes on  
81 older adults, such as physical inactivity, anxiety, depressive symptoms, and fear of falling(2, 3).

82 Social isolation is a serious consequence among older adults who have experienced a  
83 fall(4). Social isolation is a complex phenomenon that can be characterized by five key  
84 attributes: decreased number of social contacts, decreased feeling of belonging, reduced or lack  
85 of fulfilling relationships, decreased engagement with others, and reduced quality of the  
86 members in one's network(5). Loneliness is another consequence that may occur after a fall and  
87 can be defined as "the unpleasant experience that occurs when a person's network of social  
88 relations is deficient in some way, either quantitatively or qualitatively"(6). Some research has  
89 focused on the risk of social isolation and loneliness after experiencing a fall, since people who  
90 have experienced a fall are less likely to continue their activities of daily living(4). For example,  
91 one study reported a statistically significant relationship between feelings of loneliness and social  
92 exclusion after experiencing a fall(4).

93 Although social isolation and loneliness are related, it is important to note that they are  
94 two distinct concepts(7). Social isolation is more objective, as it can be measured by examining  
95 the presence or absence of relationships with other people, whereas loneliness is a person's  
96 subjective experience and is more difficult to measure. This distinction is important, as different  
97 interventions might be required for each of these outcomes after experiencing a fall.

98 Social isolation and loneliness among older adults is associated with many adverse health  
99 outcomes, including cognitive decline, depression, anxiety, and dementia(8). Interventions to

1  
2  
3 100 mitigate social isolation and loneliness after older adults experience a fall is of paramount  
4  
5 101 importance. Examples of interventions may include participating in social activities, outreach  
6  
7 102 calls from peers or healthcare workers, and group exercise. The objective of our systematic  
8  
9 103 review was to identify effective interventions to mitigate social isolation and loneliness in older  
10  
11 104 adults who lived independently in a community setting with a history of falling.  
12  
13  
14

## 15 105 **METHODS**

### 16 106 Protocol

17  
18  
19  
20 107 The protocol for this systematic review was developed in accordance with the Preferred  
21  
22 108 Reporting Items for Systematic Review and Meta-Analysis Protocols (PRISMA-P) checklist,  
23  
24 109 with consultation from knowledge users and clinical experts and was registered on PROSPERO  
25  
26 110 (CRD42020198487). This systematic review was conducted according to methodology outlined  
27  
28 111 in the Cochrane Handbook(9), and the PRISMA checklist (Supplementary File 1) was used to  
29  
30 112 guide the reporting of our results(10).  
31  
32  
33

### 34 113 Search strategy and selection criteria

35  
36 114 A comprehensive literature search strategy was developed by an experienced information  
37  
38 115 specialist and peer-reviewed by a second information specialist using the Peer Review of  
39  
40 116 Electronic Search Strategies (PRESS) checklist(11). MEDLINE, Embase, the Cochrane Central  
41  
42 117 Register of Controlled Trials, and Ageline were searched from inception until February 25, 2020  
43  
44 118 (Appendix 1). The reference lists of included studies and relevant reviews were also scanned. A  
45  
46 119 search for grey literature was conducted using the Canadian Agency for Drugs and Technologies  
47  
48 120 in Health (CADTH)'s Grey Matters checklist(12).  
49  
50  
51

52 121 Our eligibility criteria are summarized in Table 1. Studies were eligible for inclusion if  
53  
54 122 they described any intervention for social isolation or feelings of loneliness in older adults (mean  
55  
56  
57  
58  
59  
60

1  
2  
3 123 age 65 years and older) with any participant reporting a history of falling (i.e., regardless of the  
4  
5 124 proportion of the sample who fell) and who lived independently in a community setting. Eligible  
6  
7  
8 125 study designs included randomized controlled trials (RCTs), cohort studies, case control studies,  
9  
10 126 non-randomized controlled trials, quasi-experimental studies, interrupted time series or  
11  
12 127 controlled/uncontrolled before after studies. Case reports, case series, cross-sectional studies,  
13  
14 128 qualitative studies, and reviews were not eligible for inclusion. Outcomes of interest included  
15  
16 129 any changes in social isolation or loneliness as measured using validated scales, such as the De  
17  
18 130 Jong Gierveld loneliness scale(13) and the Bude & Lantermann scale for social exclusion(14),  
19  
20 131 or any other quantitative measure of social isolation or loneliness. Social isolation was defined as  
21  
22 132 a decrease in the number of social contacts, decreased feeling of belonging, reduced or lack of  
23  
24 133 fulfilling relationships, decreased engagement with others, and reduced quality of the members  
25  
26 134 in one's network(5). Loneliness was defined as "the unpleasant experience that occurs when a  
27  
28 135 person's network of social relations is deficient in some way, either quantitatively or  
29  
30  
31 136 qualitatively(6).

32  
33  
34  
35 137 All citations were screened by two independent reviewers after the entire team completed  
36  
37 138 a training exercise on 50 citations and 78% agreement was achieved. Full-text screening by two  
38  
39 139 independent reviewers began after a training exercise on 22 articles amongst the team with an  
40  
41 140 agreement of 75%. Discrepancies for both levels of screening were resolved by a third reviewer  
42  
43 141 or through discussion.

#### 44 45 46 142 Data abstraction and risk of bias appraisal

47  
48  
49 143 Data abstraction and risk of bias appraisal were also conducted independently by pairs of  
50  
51 144 reviewers after a training pilot exercise reached sufficient agreement, and discrepancies were  
52  
53 145 resolved by a third reviewer. The risk of bias appraisal was conducted using the Cochrane  
54  
55  
56  
57  
58  
59  
60

1  
2  
3 146 Effective Practice and Organisation of Care (EPOC) risk of bias tool, as it was expected that a  
4  
5 147 mixture of study designs would be included(15).  
6  
7

### 8 148 Synthesis

9  
10 149 The findings of this review were summarized descriptively, reporting study and patient  
11  
12 150 characteristics, quality appraisal assessment, and intervention details. As outlined in our review  
13  
14 151 protocol, we planned to conduct a meta-analysis if more than one study evaluated the same  
15  
16 152 intervention, and a network meta-analysis for connected networks of trials with pre-specified  
17  
18 153 intervention nodes if over 10 trials were available and the number of trials was greater than the  
19  
20 154 number of interventions. However, as these conditions were not met, no statistical analyses were  
21  
22  
23 155 conducted.  
24  
25  
26

### 27 156 Patient and Public Involvement

28  
29  
30 157 A patient partner with previous experience of a fall was identified and involved in this study  
31  
32 158 from the protocol development stage. The patient partner provided input on our research question  
33  
34 159 and outcome measures to ensure that the patient perspective was incorporated. They also  
35  
36 160 participated in the screening training exercises for citations and full-text articles, provided  
37  
38 161 feedback on screening eligibility criteria, and reviewed the manuscript as a coauthor.  
39  
40  
41  
42

## 43 162 **RESULTS**

### 44 45 163 Study flow

46  
47 164 After screening 4,069 citations and 55 full-text articles against our eligibility criteria, 4  
48  
49 165 studies(16-18) met the eligibility criteria and were included in this review (Figure 1).  
50  
51

### 52 166 Study and patient characteristics

53  
54  
55  
56  
57  
58  
59  
60



1  
2  
3 167 Study and patient characteristics are summarized in Table 2 and detailed characteristics are  
4  
5 168 reported in Appendices 1 and 2. The mean age of participants across included studies was 77.8  
6  
7 169 years (range: 76 to 79.5 years). Three of the included studies were conducted in North America  
8  
9 170 (75.0%) and one in Europe (25.0%) and they were conducted in a variety of settings including  
10  
11 171 the community setting, a combination of participant homes and community setting, a  
12  
13 172 combination of primary care and community setting, or a combination of participant homes and  
14  
15 173 primary care. Only one study provided data on frailty of the included participants, reporting  
16  
17 174 20.2% of participants with frailty (Appendix 2). The four studies varied in study design,  
18  
19 175 including a randomized controlled trial, a non-randomized controlled trial, an uncontrolled  
20  
21 176 before-after study, and a quasi-experimental study in which data from one randomized site was  
22  
23 177 combined with data from four controlled before-after sites. Two of the studies had a study  
24  
25 178 duration of 12 months, and the other two had a duration of 6 months. The sample size in the  
26  
27 179 studies ranged from 21 to 2325 and, on average, 71.3% of participants were female.

### 32 33 180 Risk of bias results

34  
35 181 An overall summary of risk of bias across the four studies can be found in Appendix 3, and  
36  
37 182 detailed risk of bias assessments can be found in Appendix 4. All studies had low risk of bias for  
38  
39 183 baseline outcome measurements (100% low, 0% unclear, 0% high), and other bias (mainly  
40  
41 184 funding bias; 100% low, 0% unclear, 0% high). Two of the studies had low risk and two had  
42  
43 185 unclear risk of bias for selective reporting (50% low, 50% unclear, 0% high). One study had high  
44  
45 186 risk, two studies unclear risk, and one had low risk of bias for incomplete outcome data (25%  
46  
47 187 low, 50% unclear, 25% high). However, three of four studies had high risk of bias for blinding of  
48  
49 188 outcome assessment (25% low, 0% unclear, 75% high), blinding of participants and personnel  
50  
51  
52  
53  
54  
55  
56  
57  
58  
59  
60

1  
2  
3 189 (25% low, 0% unclear, 75% high), random sequence generation (25% low, 0% unclear, 75%  
4  
5 190 high), and allocation concealment (25% low, 0% unclear, 75% high).  
6  
7

### 8 191 Outcome results

9  
10 192 The relevant findings from the four included studies are summarized in Appendix 6.  
11  
12 193 Cohen et al. (2006) conducted a non-randomized controlled trial in the United States assessing  
13  
14 194 the effects of singing in a chorale to reduce loneliness compared to usual care in 166 older adults.  
15  
16 195 The chorale intervention involved attendance at weekly singing rehearsals and several public  
17  
18 196 performances, while the usual care group continued their usual activities. Both groups had a  
19  
20 197 similar baseline history of falling over the past 12 months (average of 0.40 falls per person in the  
21  
22 198 intervention group, and 0.36 per person in the control group). After 12 months of follow-up, they  
23  
24 199 noted a reduction in loneliness (as measured using the UCLA Loneliness Scale-III) in both  
25  
26 200 groups (chorale: baseline mean: 35.1 (SD, 8.1) and follow-up mean: 34.6 (SD, 7.9); usual care:  
27  
28 201 baseline mean: 38.3 (SD, 10.1) and follow-up mean: 37.0 (SD, 10.3). While the chorale  
29  
30 202 intervention reported lower loneliness scores than the usual care group after 12 months of  
31  
32 203 follow-up, no statistically significant difference was observed ( $F(1,126) = 3.08; p = 0.08$ ).  
33  
34  
35  
36  
37

38 204 Scharlach et al. (2015) conducted an uncontrolled before-after study in the United States  
39  
40 205 assessing the effectiveness of their ElderHelp Concierge Club intervention on social isolation in  
41  
42 206 a sample of 21 participants(17). The Concierge Club intervention was a community-based care  
43  
44 207 model that provided different tiers of services to their members including information and  
45  
46 208 referrals, transportation, or in-house assessments. The baseline mean number of falls over the  
47  
48 209 past 6 months was 1.3. They noted that social isolation, as measured using an unnamed 3-item  
49  
50 210 scale(19), did not change significantly after 6 months of follow-up (baseline mean: 8.7 (SD, 3.2)  
51  
52 211 and follow-up mean: 7.0 (SD, 3.8)). Similarly, although all participants reported having contact  
53  
54  
55  
56  
57  
58  
59

1  
2  
3 212 with friends/relatives after the intervention, this was not found to be a significant change from  
4  
5 213 baseline (baseline: 76% of participants, follow-up: 100% of participants).  
6

7  
8 214 Franse et al. (2018) conducted a quasi-experimental study comparing the effectiveness of  
9  
10 215 the Urban Health Centres Europe (UHCE) approach compared to usual care on loneliness in a  
11  
12 216 sample of 1,844 older adults across the United Kingdom, Greece, Croatia, the Netherlands, and  
13  
14 217 Spain(18). The UHCE approach involved a preventative multidimensional health assessment,  
15  
16 218 which informed the coordination of specific care pathways targeting the individual's needs (such  
17  
18 219 as fall risk, appropriate medication use, loneliness, and frailty). The usual care group received  
19  
20 220 their usual care and had access to any already existing services. At baseline, 30.2% of  
21  
22 221 participants reported having experienced a fall in the past 12 months. Their adjusted analysis  
23  
24 222 found a small positive effect of the UHCE approach on loneliness, as measured using the short  
25  
26 223 De Jong Gierveld Loneliness scale(20), when compared to usual care (B= -0.18, 95% CI= -0.35  
27  
28 224 to -0.02).  
29  
30  
31  
32

33 225 Dolovich et al. (2019) conducted a randomized controlled trial comparing the  
34  
35 226 effectiveness of the Health TAPESTRY (Health Teams Advancing Patient Experience:  
36  
37 227 STREngthening qualityY) intervention compared to usual care on social isolation in a sample of  
38  
39 228 312 older adults in Canada(21). This intervention involved the collection of information on  
40  
41 229 patients' health goals and needs by trained volunteers, who then summarized these findings in a  
42  
43 230 report for the interprofessional primary care team. The primary care team used these reports to  
44  
45 231 generate and act on plans of care for how the team, community agencies, and volunteers could  
46  
47 232 help address each patient's goals. The control group received usual care. Approximately 9.3% of  
48  
49 233 participants reported experiencing at least one fall. After 6 months of follow-up, they found no  
50  
51 234 statistically significant difference between the intervention and control groups in terms of their  
52  
53  
54  
55  
56  
57  
58  
59  
60

1  
2  
3 235 social network scores (mean difference, 0.038 (95% CI: -0.25 to 0.33) and social satisfaction  
4  
5 236 scores (mean difference, 0.102 (95% CI, -0.35 to 0.55), as measured using the Duke Social  
6  
7  
8 237 Support Index(22).  
9

## 10 11 238 **DISCUSSION** 12

13 239 We conducted a comprehensive systematic review of interventions to mitigate social isolation  
14  
15 240 and loneliness in older adults living independently in a community setting who experienced a  
16  
17 241 fall. Very few studies were identified that fulfilled our eligibility criteria, indicating a dearth of  
18  
19 242 evidence on this important topic. Only 4 studies were included and as each examined different  
20  
21 243 types of interventions, this precluded any statistical pooling of results. Furthermore, studies  
22  
23 244 varied on the proportion of participants who reported experiencing a fall and multiple types of  
24  
25 245 outcomes were assessed for loneliness and social isolation, making it challenging to provide any  
26  
27 246 meaningful interpretation of results.  
28  
29  
30

31  
32 247       Across the four studies in this systematic review, only the quasi-experimental study by  
33  
34 248 Franse et al. (2018)(18), which assessed the impact of multifactorial health assessments and  
35  
36 249 coordinated care pathways targeting fall risk, medication use, loneliness and frailty, found a  
37  
38 250 small positive effect on loneliness (i.e. reduction) when comparing those that received the  
39  
40 251 intervention with the control group. However, given the paucity of data in older adults with a  
41  
42 252 history of falling, the most effective intervention for preventing or reducing social isolation  
43  
44 253 remains unclear. Only one randomized controlled trial was identified in this review, highlighting  
45  
46 254 the need for more robust research in this important area.  
47  
48  
49

50 255       We searched for previous reviews that were related and only one was identified. Gardiner  
51  
52 256 et al. (2016) conducted an integrative review on interventions for social isolation in older  
53  
54 257 adults(23). While this review was not specific to individuals who had experienced a fall, it  
55  
56  
57  
58  
59  
60

1  
2  
3 258 discusses characteristics of effective social isolation interventions in the broader older adult  
4  
5 259 population and could be applicable to the subset of this population that experiences falling.  
6  
7  
8 260 While the majority of interventions they identified showed at least a moderate positive effect on  
9  
10 261 social isolation or loneliness, they noted that the quality of the evidence was poor, making it  
11  
12 262 difficult to identify a particular intervention as most effective(23). This is consistent with our  
13  
14 263 determination of the need for more robust research on the effectiveness of social isolation  
15  
16 264 interventions in older adults with a history of falling. They identified adaptability to local  
17  
18 265 contexts, community participation in the design and implementation of the intervention, and  
19  
20 266 productive engagement (as opposed to passive activities) as common features among successful  
21  
22 267 interventions(23). Future studies should consider these factors in the development and evaluation  
23  
24  
25 268 of interventions for social isolation.

26  
27  
28 269 Across our included studies, all four interventions appeared to be adapted to their local  
29  
30 270 contexts. The UHCE approach by Franse et al. (2018) and the Health TAPESTRY intervention  
31  
32 271 by Dolovich et al. (2019) also involved strong community participation by tailoring their  
33  
34 272 intervention to each participant's health care needs, however it is unclear whether the subsequent  
35  
36 273 care pathways or plans allowed for productive engagement. Cohen et al. (2006)'s chorale  
37  
38 274 intervention provided productive engagement to participants but may have benefited from further  
39  
40 275 community participation in the implementation of the intervention.

41  
42  
43  
44 276 There are many strengths to our systematic review. Our search strategy was peer-  
45  
46 277 reviewed by a second librarian and was comprehensive through the inclusion of four databases,  
47  
48 278 searching grey literature and scanning references of included studies and relevant reviews. Our  
49  
50 279 methodology was informed by the Cochrane Handbook(9), with screening, data abstraction, and  
51  
52 280 risk of bias appraisal being conducted in duplicate by independent reviewers, and our findings  
53  
54  
55  
56  
57  
58  
59

1  
2  
3 281 were reported using PRISMA-2020(10). However, there are some limitations. We deviated from  
4  
5 282 our protocol slightly to allow for inclusion of studies where only some participants had a history  
6  
7 283 of falling, given the paucity of data on older adults in a community setting who had experienced  
8  
9 284 a fall. We were unable to update our literature search due to a lack of sufficient funding. Further,  
10  
11 285 studies were plagued by risk of bias across several components, including to risk of bias from  
12  
13 286 poor allocation concealment, lack of random sequence generation, and a lack of blinding of  
14  
15 287 participants, personnel, and outcome assessors. A lack of standardization was observed across  
16  
17 288 the outcomes assessed in the included studies, suggesting that future work could focus on  
18  
19 289 developing consensus on measures for social isolation and loneliness that have already been  
20  
21 290 validated to establish a core outcomes dataset. Indeed, a study by Cornwell et al. (2009)  
22  
23 291 highlights the wide variation in indicators for isolation and loneliness and proposed combining  
24  
25 292 these varying indicators to develop two parsimonious scales to measure social disconnectedness  
26  
27 293 and perceived isolation (24), however, these scales were not used by the included studies here.  
28  
29 294 Furthermore, additional examination of tailoring interventions to reduce loneliness and/or social  
30  
31 295 isolation is warranted, as there was a dearth of included studies to examine this fully in this  
32  
33 296 systematic review with two studies each focusing on social isolation and loneliness separately.  
34  
35 297 Further research is warranted on this, as social isolation and loneliness are distinct concepts and  
36  
37 298 different interventions may be required to target each outcome separately.  
38  
39  
40  
41  
42  
43  
44

45 299 We recommend updating this systematic review as more literature becomes available on  
46  
47 300 this topic. Effective interventions are necessary to support older people who are at increased risk  
48  
49 301 of social isolation, particularly after experiencing a fall. In addition, further work is required to  
50  
51 302 examine the relationship between social isolation, loneliness, and falling, and whether other  
52  
53 303 variables influence this relationship, as this may warrant different intervention approaches.  
54  
55  
56  
57  
58  
59  
60

1  
2  
3 304 In conclusion, we identified four studies examining interventions for social isolation  
4  
5 305 amongst older adults with a history of falling. The interventions examined varied widely, from  
6  
7 306 singing in a chorale to community-base care coordination, as did the outcome measures used to  
8  
9  
10 307 assess the effectiveness of the interventions. We identified only one quasi-experimental study  
11  
12 308 which demonstrated that multifactorial health assessments and coordinated care pathways  
13  
14 309 resulted in a small positive effect on loneliness in this population. Future research is warranted in  
15  
16  
17 310 this under-studied area.  
18  
19  
20  
21  
22  
23  
24  
25  
26  
27  
28  
29  
30  
31  
32  
33  
34  
35  
36  
37  
38  
39  
40  
41  
42  
43  
44  
45  
46  
47  
48  
49  
50  
51  
52  
53  
54  
55  
56  
57  
58  
59  
60

## 311 LIST OF ABBREVIATIONS

|     |        |                                                                    |
|-----|--------|--------------------------------------------------------------------|
| 312 | CADTH  | Canadian Agency for Drugs and Technologies in Health               |
| 313 | CI     | Confidence interval                                                |
| 314 | EPOC   | Effective Practice and Organisation of Care                        |
| 315 | IQR    | Interquartile range                                                |
| 316 | PRESS  | Peer Review of Electronic Search Strategies                        |
| 317 | PRISMA | Preferred Reporting Items for Systematic Reviews and Meta-Analyses |
| 318 | RCT    | Randomized controlled trial                                        |
| 319 | SD     | Standard deviation                                                 |

## 320 DECLARATIONS

### 321 Funding

322 This work was funded through the SPOR Evidence Alliance. The SPOR Evidence Alliance is  
323 supported by the Canadian Institutes of Health Research (CIHR) under Canada's Strategy for  
324 Patient-Oriented Research (SPOR) initiative, and the generosity of partners from 41 public  
325 agencies and organizations across Canada who have made cash or in-kind contributions. Dr.  
326 Tricco is funded by a Tier 2 Canada Research Chair in Knowledge Synthesis, and Dr. Straus is  
327 funded by a Tier 1 Canada Research Chair in Knowledge Translation.

### 328 Acknowledgements

329 We thank Jessie McGowan for developing our search strategies, Tamara Rader for peer  
330 reviewing the search strategies (PRESS), and Alissa Epworth for running the searches, de-  
331 duplicating results and obtaining full-text articles. We thank Joanne Bowater for her input during  
332 earlier stages of the project. Finally, we thank Katrina Chiu, Navjot Mann, and Faryal Khan for  
333 their support with formatting the manuscript and creating tables and appendices.



1  
2  
3 334 Ethics approval

4  
5 335 Not required.

6  
7  
8 336 Consent for publication

9  
10 337 Not applicable.

11  
12 338 Author Contribution

13  
14 339 Substantial contributions to the conception or design of the work (ACT, SMT, JW, SES);

15  
16 340 acquisition, analysis, or interpretation of data for the work (all authors); drafting the work (ACT,

17  
18 341 SMT) or revising it critically for important intellectual content (AR, NR, GM, JF, YJ, MdG, KA,

19  
20 342 JB, AG-B, JW, SES); final approval of the version to be published (all authors); agreement to be

21  
22 343 accountable for all aspects of the work in ensuring that questions related to the accuracy or

23  
24 344 integrity of any part of the work are appropriately investigated and resolved (all authors)

25  
26 345 Availability of data and materials

27  
28 346 The full dataset is available from the corresponding author upon reasonable request.

29  
30 347 Conflict of interests

31  
32 348 All authors do not have any potential (or perceived) conflicts of interest.

33  
34 349 Role of the funder

35  
36 350 The funder had no role in the design and conduct of the study; collection, management, analysis,

37  
38 351 and interpretation of the data; preparation, review, or approval of the manuscript; or decision to

39  
40 352 submit the manuscript for publication.

41  
42 353 **SUPPLEMENTAL FILES**

43  
44 354 Supplemental File 1: PRISMA Checklist

45  
46 355 Supplemental File 2: Appendices

47  
48 356 **FIGURES**

1  
2  
3 357 Figure 1 – PRISMA study flow of included studies (n=4)  
4  
5  
6  
7  
8  
9  
10  
11  
12  
13  
14  
15  
16  
17  
18  
19  
20  
21  
22  
23  
24  
25  
26  
27  
28  
29  
30  
31  
32  
33  
34  
35  
36  
37  
38  
39  
40  
41  
42  
43  
44  
45  
46  
47  
48  
49  
50  
51  
52  
53  
54  
55  
56  
57  
58  
59  
60

For peer review only

1  
2  
3 **TABLES**  
4

5 Table 1 – Screening Eligibility Criteria  
6

7

|                  |                                                                                                                                                                                                                                                            |
|------------------|------------------------------------------------------------------------------------------------------------------------------------------------------------------------------------------------------------------------------------------------------------|
| 8 Population     | Older adults (mean age 65 years and older) living independently in a community setting with any participant reporting a history of falling (i.e., regardless of the proportion of the sample who fell)                                                     |
| 9 Intervention   | Any intervention for social isolation or loneliness                                                                                                                                                                                                        |
| 10 Comparator    | Usual care or another intervention for social isolation or loneliness                                                                                                                                                                                      |
| 11 Outcomes      | Any quantitative measures of changes in social isolation or loneliness<br>Ex: the quantity of social interactions, Lubben Social Network Scale for social isolation, De Jong Gierveld Loneliness Scale, Bude & Lantermann scale for social exclusion, etc. |
| 12 Study designs | Randomized controlled trial (RCT), non-RCT, quasi-experimental, interrupted time series, controlled or uncontrolled before-after, case control studies, cohort studies                                                                                     |
| 13 Time          | No time restrictions                                                                                                                                                                                                                                       |

14  
15  
16  
17  
18  
19  
20  
21  
22  
23  
24  
25  
26  
27  
28  
29  
30  
31  
32  
33  
34  
35  
36  
37  
38  
39  
40  
41  
42  
43  
44  
45  
46  
47  
48  
49  
50  
51  
52  
53  
54  
55  
56  
57  
58  
59  
60

Table 2 – Study and Patient Characteristics

| <b>Summary characteristics</b>                                                                                          |                     |
|-------------------------------------------------------------------------------------------------------------------------|---------------------|
| Mean age (range)                                                                                                        | 77.8 (76 to 79.6)*  |
| Mean % of female participants (range)                                                                                   | 71.3 (60.8 to 91)** |
| Mean sample size (range)                                                                                                | 837.3 (21 to 2325)  |
| Mean % of participants living alone (range)                                                                             | 52.6 (38.1 to 67)*  |
| Mean % of participants with history of falling (range)                                                                  | 19.6 (9.3 to 30.2)* |
| <b>Individual study details</b>                                                                                         |                     |
| <b>Cohen, 2006 → Chorale intervention</b>                                                                               |                     |
| Country of conduct: United States                                                                                       |                     |
| Study design: Non-randomized controlled trial                                                                           |                     |
| Study duration: 12 months                                                                                               |                     |
| Sample size: 166                                                                                                        |                     |
| Intervention setting: Community                                                                                         |                     |
| <b>Scharlach, 2015 → ElderHelp Concierge Club (CC) intervention</b>                                                     |                     |
| Country of conduct: United States                                                                                       |                     |
| Study design: Uncontrolled before-after study                                                                           |                     |
| Study duration: 6 months                                                                                                |                     |
| Sample size: 21                                                                                                         |                     |
| Intervention setting: Participant homes and community                                                                   |                     |
| <b>Franse, 2018 → Urban Health Centres Europe (UHCE) approach</b>                                                       |                     |
| Country of conduct: United Kingdom, Greece, Croatia, the Netherlands, Spain                                             |                     |
| Study design: Quasi-experimental (one site randomized, four sites controlled before-after)                              |                     |
| Study duration: 12 months                                                                                               |                     |
| Sample size: 2325                                                                                                       |                     |
| Intervention setting: Primary care and community settings                                                               |                     |
| <b>Dolovich, 2019 → Health TAPESTRY (Health Teams Advancing Patient Experience: STRengthening Quality) intervention</b> |                     |
| Country of conduct: Canada                                                                                              |                     |
| Study design: Randomized controlled trial                                                                               |                     |
| Study duration: 6 months                                                                                                |                     |
| Sample size: 312                                                                                                        |                     |
| Intervention setting: Participant homes and primary care                                                                |                     |

\*Only two of four studies reported on these variables

\*\*Only three of four studies reported on this variable

## REFERENCES

1. WHO. Falls 2018 [updated January 16, 2018. Available from: <https://www.who.int/news-room/fact-sheets/detail/falls>.
2. Terroso M, Rosa N, Torres Marques A, Simoes R. Physical consequences of falls in the elderly: a literature review from 1995 to 2010. *EURAPA*. 2014;11(1):51-9.
3. Petersen N, König HH, Hajek A. The link between falls, social isolation and loneliness: A systematic review. *Arch Gerontol Geriatr*. 2020;88:104020.
4. Hajek A, König H-H. The association of falls with loneliness and social exclusion: evidence from the DEAS German Ageing Survey. *BMC Geriatr*. 2017;17(1):204-.
5. Nicholson Jr. NR. Social isolation in older adults: an evolutionary concept analysis. *J Adv Nurs*. 2009;65(6):1342-52.
6. Perlman D, Peplau LA. Toward a social psychology of loneliness. *Pers Relatsh*. 1981;3:31-56.
7. de Jong Gierveld J, Van Tilburg T, Dykstra PA. Loneliness and social isolation. *Cambridge handbook of personal relationships*. 2006:485-500.
8. National Academies of Sciences E, Medicine. *Social Isolation and Loneliness in Older Adults: Opportunities for the Health Care System*. Washington, DC: NAP; 2020. 316 p.
9. Higgins JPT TJ, Chandler J, Cumpston M, Li T, Page MJ, Welch VA. *Cochrane Handbook for Systematic Reviews of Interventions version 6.1*: Cochrane; 2020.
10. Page MJ, McKenzie JE, Bossuyt PM, Boutron I, Hoffmann TC, Mulrow CD, et al. Updating guidance for reporting systematic reviews: development of the PRISMA 2020 statement. *J Clin Epidemiol*. 2021.
11. McGowan J, Sampson M, Salzwedel DM, Cogo E, Foerster V, Lefebvre C. *PRESS Peer Review of Electronic Search Strategies: 2015 Guideline Statement*. *J Clin Epidemiol*. 2016;75:40-6.
12. Wishart DS, Feunang YD, Guo AC, Lo EJ, Marcu A, Grant JR, et al. DrugBank 5.0: a major update to the DrugBank database for 2018. *Nucleic acids research*. 2018;46(D1):D1074-D82.
13. Gierveld JDJ, Tilburg TV. A 6-Item Scale for Overall, Emotional, and Social Loneliness: Confirmatory Tests on Survey Data. *Research on Aging*. 2006;28(5):582-98.
14. Bude H, Lantermann E-D. Soziale exklusion und exklusionsempfinden. *KZfSS*. 2006;58(2):233-52.
15. Cochrane Effective Practice and Organisation of Care (EPOC). EPOC Resources for review authors 2017 [Available from: [https://epoc.cochrane.org/sites/epoc.cochrane.org/files/public/uploads/Resources-for-authors2017/suggested\\_risk\\_of\\_bias\\_criteria\\_for\\_epoc\\_reviews.pdf](https://epoc.cochrane.org/sites/epoc.cochrane.org/files/public/uploads/Resources-for-authors2017/suggested_risk_of_bias_criteria_for_epoc_reviews.pdf)].
16. Cohen GD, Perlstein S, Chapline J, Kelly J, Firth KM, Simmens S. The impact of professionally conducted cultural programs on the physical health, mental health, and social functioning of older adults. *The Gerontologist*. 2006;46(6):726-34.
17. Scharlach AE, Graham CL, Berridge C. An integrated model of co-ordinated community-based care. *The Gerontologist*. 2015;55(4):677-87.
18. Franse CB, van Grieken A, Alhambra-Borrás T, Valía-Cotanda E, van Staveren R, Rentoumis T, et al. The effectiveness of a coordinated preventive care approach for healthy ageing (UHCE) among older persons in five European cities: a pre-post controlled trial. *IJNS*. 2018;88:153-62.

19. Hughes ME, Waite LJ, Hawkley LC, Cacioppo JT. A Short Scale for Measuring Loneliness in Large Surveys: Results From Two Population-Based Studies. *Res Aging*. 2004;26(6):655-72.
20. De Jong Gierveld J, Van Tilburg T. The De Jong Gierveld short scales for emotional and social loneliness: tested on data from 7 countries in the UN generations and gender surveys. *Eur J Ageing*. 2010;7(2):121-30.
21. Dolovich L, Oliver D, Lamarche L, Thabane L, Valaitis R, Agarwal G, et al. Combining volunteers and primary care teamwork to support health goals and needs of older adults: a pragmatic randomized controlled trial. *CMAJ*. 2019;191(18):E491-E500.
22. Wardian J, Robbins D, Wolfersteig W, Johnson T, Dustman P. Validation of the DSSI-10 to Measure Social Support in a General Population. *RSWP*. 2013;23.
23. Gardiner C, Geldenhuys G, Gott M. Interventions to reduce social isolation and loneliness among older people: an integrative review. *Health Soc Care Community*. 2018;26(2):147-57.
24. Cornwell EY, Waite LJ. Measuring social isolation among older adults using multiple indicators from the NSHAP study. *J Gerontol B Psychol Sci Soc Sci*. 2009;64 Suppl 1(Suppl 1):i38-i46.

Figure 1 – PRISMA study flow of included studies (n=4)

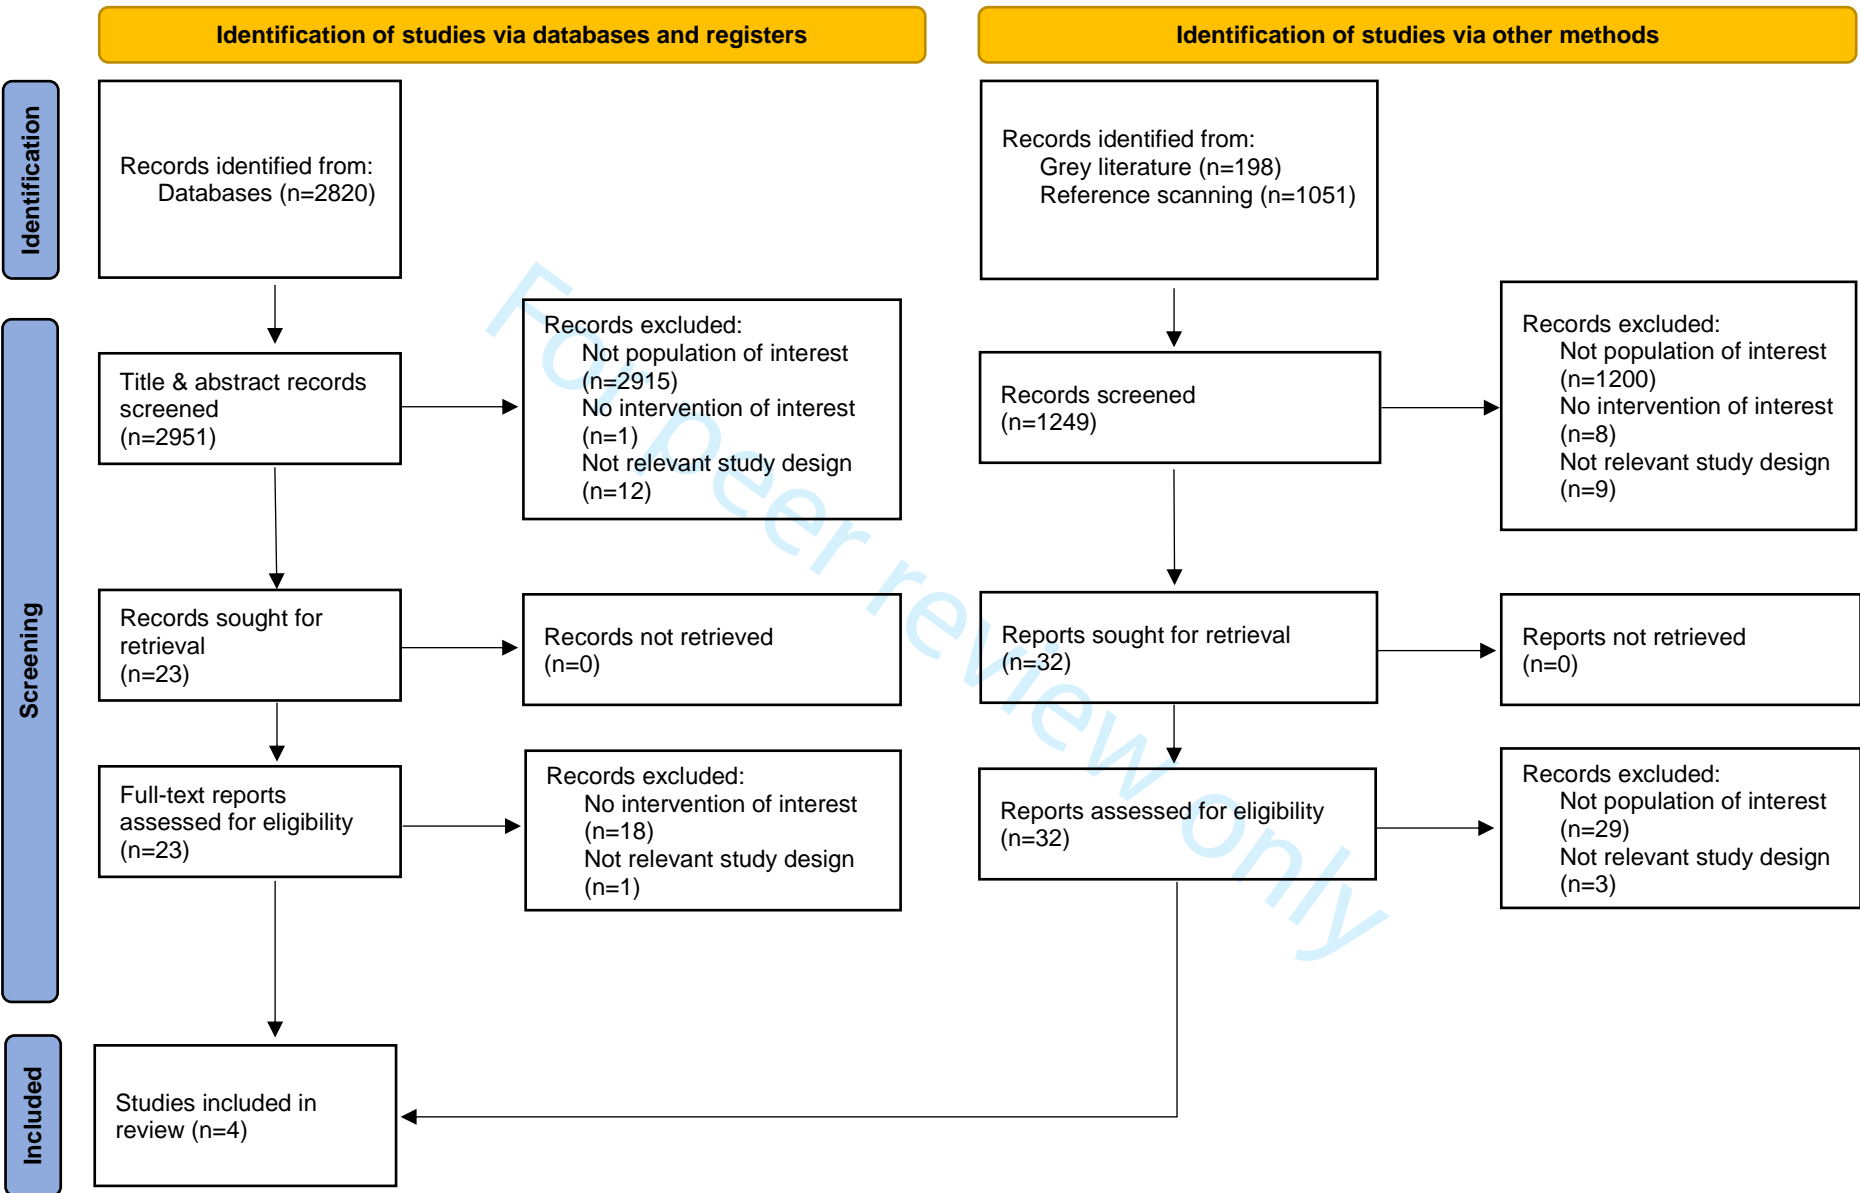

## Supplementary File 1: PRISMA Checklist

| Section and Topic             | Item # | Checklist item                                                                                                                                                                                                                                                                                       | Location where item is reported |
|-------------------------------|--------|------------------------------------------------------------------------------------------------------------------------------------------------------------------------------------------------------------------------------------------------------------------------------------------------------|---------------------------------|
| <b>TITLE</b>                  |        |                                                                                                                                                                                                                                                                                                      |                                 |
| Title                         | 1      | Identify the report as a systematic review.                                                                                                                                                                                                                                                          | 1                               |
| <b>ABSTRACT</b>               |        |                                                                                                                                                                                                                                                                                                      |                                 |
| Abstract                      | 2      | See the PRISMA 2020 for Abstracts checklist.                                                                                                                                                                                                                                                         | 3-4                             |
| <b>INTRODUCTION</b>           |        |                                                                                                                                                                                                                                                                                                      |                                 |
| Rationale                     | 3      | Describe the rationale for the review in the context of existing knowledge.                                                                                                                                                                                                                          | 5                               |
| Objectives                    | 4      | Provide an explicit statement of the objective(s) or question(s) the review addresses.                                                                                                                                                                                                               | 5                               |
| <b>METHODS</b>                |        |                                                                                                                                                                                                                                                                                                      |                                 |
| Eligibility criteria          | 5      | Specify the inclusion and exclusion criteria for the review and how studies were grouped for the syntheses.                                                                                                                                                                                          | 6, Table 1                      |
| Information sources           | 6      | Specify all databases, registers, websites, organisations, reference lists and other sources searched or consulted to identify studies. Specify the date when each source was last searched or consulted.                                                                                            | 6                               |
| Search strategy               | 7      | Present the full search strategies for all databases, registers and websites, including any filters and limits used.                                                                                                                                                                                 | Appendix 1                      |
| Selection process             | 8      | Specify the methods used to decide whether a study met the inclusion criteria of the review, including how many reviewers screened each record and each report retrieved, whether they worked independently, and if applicable, details of automation tools used in the process.                     | 6-7                             |
| Data collection process       | 9      | Specify the methods used to collect data from reports, including how many reviewers collected data from each report, whether they worked independently, any processes for obtaining or confirming data from study investigators, and if applicable, details of automation tools used in the process. | 7                               |
| Data items                    | 10a    | List and define all outcomes for which data were sought. Specify whether all results that were compatible with each outcome domain in each study were sought (e.g. for all measures, time points, analyses), and if not, the methods used to decide which results to collect.                        | 7                               |
|                               | 10b    | List and define all other variables for which data were sought (e.g. participant and intervention characteristics, funding sources). Describe any assumptions made about any missing or unclear information.                                                                                         | 7                               |
| Study risk of bias assessment | 11     | Specify the methods used to assess risk of bias in the included studies, including details of the tool(s) used, how many reviewers assessed each study and whether they worked independently, and if applicable, details of automation tools used in the process.                                    | 8                               |
| Effect measures               | 12     | Specify for each outcome the effect measure(s) (e.g. risk ratio, mean difference) used in the synthesis or presentation of results.                                                                                                                                                                  | N/A                             |
| Synthesis methods             | 13a    | Describe the processes used to decide which studies were eligible for each synthesis (e.g. tabulating the study intervention characteristics and comparing against the planned groups for each synthesis (item #5)).                                                                                 | 8                               |
|                               | 13b    | Describe any methods required to prepare the data for presentation or synthesis, such as handling of missing summary statistics, or data conversions.                                                                                                                                                | 8                               |
|                               | 13c    | Describe any methods used to tabulate or visually display results of individual studies and syntheses.                                                                                                                                                                                               | 8                               |



| Section and Topic             | Item # | Checklist item                                                                                                                                                                                                                                                                       | Location where item is reported |
|-------------------------------|--------|--------------------------------------------------------------------------------------------------------------------------------------------------------------------------------------------------------------------------------------------------------------------------------------|---------------------------------|
|                               | 13d    | Describe any methods used to synthesize results and provide a rationale for the choice(s). If meta-analysis was performed, describe the model(s), method(s) to identify the presence and extent of statistical heterogeneity, and software package(s) used.                          | 8                               |
|                               | 13e    | Describe any methods used to explore possible causes of heterogeneity among study results (e.g. subgroup analysis, meta-regression).                                                                                                                                                 | N/A                             |
|                               | 13f    | Describe any sensitivity analyses conducted to assess robustness of the synthesized results.                                                                                                                                                                                         | N/A                             |
| Reporting bias assessment     | 14     | Describe any methods used to assess risk of bias due to missing results in a synthesis (arising from reporting biases).                                                                                                                                                              | 8                               |
| Certainty assessment          | 15     | Describe any methods used to assess certainty (or confidence) in the body of evidence for an outcome.                                                                                                                                                                                | N/A                             |
| <b>RESULTS</b>                |        |                                                                                                                                                                                                                                                                                      |                                 |
| Study selection               | 16a    | Describe the results of the search and selection process, from the number of records identified in the search to the number of studies included in the review, ideally using a flow diagram.                                                                                         | 9, Figure 1                     |
|                               | 16b    | Cite studies that might appear to meet the inclusion criteria, but which were excluded, and explain why they were excluded.                                                                                                                                                          | N/A                             |
| Study characteristics         | 17     | Cite each included study and present its characteristics.                                                                                                                                                                                                                            | 9-11, Table 2, Appendix 2       |
| Risk of bias in studies       | 18     | Present assessments of risk of bias for each included study.                                                                                                                                                                                                                         | 9, Appendix 5                   |
| Results of individual studies | 19     | For all outcomes, present, for each study: (a) summary statistics for each group (where appropriate) and (b) an effect estimate and its precision (e.g. confidence/credible interval), ideally using structured tables or plots.                                                     | 9-11, Appendix 6                |
| Results of syntheses          | 20a    | For each synthesis, briefly summarise the characteristics and risk of bias among contributing studies.                                                                                                                                                                               | N/A                             |
|                               | 20b    | Present results of all statistical syntheses conducted. If meta-analysis was done, present for each the summary estimate and its precision (e.g. confidence/credible interval) and measures of statistical heterogeneity. If comparing groups, describe the direction of the effect. | N/A                             |
|                               | 20c    | Present results of all investigations of possible causes of heterogeneity among study results.                                                                                                                                                                                       | N/A                             |
|                               | 20d    | Present results of all sensitivity analyses conducted to assess the robustness of the synthesized results.                                                                                                                                                                           | N/A                             |
| Reporting biases              | 21     | Present assessments of risk of bias due to missing results (arising from reporting biases) for each synthesis assessed.                                                                                                                                                              | N/A                             |
| Certainty of evidence         | 22     | Present assessments of certainty (or confidence) in the body of evidence for each outcome assessed.                                                                                                                                                                                  | N/A                             |
| <b>DISCUSSION</b>             |        |                                                                                                                                                                                                                                                                                      |                                 |
| Discussion                    | 23a    | Provide a general interpretation of the results in the context of other evidence.                                                                                                                                                                                                    | 12-14                           |
|                               | 23b    | Discuss any limitations of the evidence included in the review.                                                                                                                                                                                                                      | 14                              |
|                               | 23c    | Discuss any limitations of the review processes used.                                                                                                                                                                                                                                | 14                              |
|                               | 23d    | Discuss implications of the results for practice, policy, and future research.                                                                                                                                                                                                       | 13-15                           |
| <b>OTHER INFORMATION</b>      |        |                                                                                                                                                                                                                                                                                      |                                 |

| Section and Topic                              | Item # | Checklist item                                                                                                                                                                                                                             | Location where item is reported |
|------------------------------------------------|--------|--------------------------------------------------------------------------------------------------------------------------------------------------------------------------------------------------------------------------------------------|---------------------------------|
| Registration and protocol                      | 24a    | Provide registration information for the review, including register name and registration number, or state that the review was not registered.                                                                                             | 4                               |
|                                                | 24b    | Indicate where the review protocol can be accessed, or state that a protocol was not prepared.                                                                                                                                             | 6                               |
|                                                | 24c    | Describe and explain any amendments to information provided at registration or in the protocol.                                                                                                                                            | 14                              |
| Support                                        | 25     | Describe sources of financial or non-financial support for the review, and the role of the funders or sponsors in the review.                                                                                                              | 16-17                           |
| Competing interests                            | 26     | Declare any competing interests of review authors.                                                                                                                                                                                         | 17                              |
| Availability of data, code and other materials | 27     | Report which of the following are publicly available and where they can be found: template data collection forms; data extracted from included studies; data used for all analyses; analytic code; any other materials used in the review. | 17                              |

From: Page MJ, McKenzie JE, Bossuyt PM, Boutron I, Hoffmann TC, Mulrow CD, et al. The PRISMA 2020 statement: an updated guideline for reporting systematic reviews. *BMJ* 2021;372:n71. doi: 10.1136/bmj.n71

For more information, visit: <http://www.prisma-statement.org/>

1  
2  
3  
4  
5  
6  
7  
8  
9  
10  
11  
12  
13  
14  
15  
16  
17  
18  
19  
20  
21  
22  
23  
24  
25  
26  
27  
28  
29  
30  
31  
32  
33  
34  
35  
36  
37  
38  
39  
40  
41  
42  
43  
44  
45  
46  
47

## Supplementary File 2: Appendices

Appendix 1 – Database Search Strategies ..... 2

Appendix 2 – Study Characteristics..... 4

Appendix 3 – Patient Characteristics ..... 5

Appendix 4 – Overall risk of bias across included studies (n=4) ..... 7

Appendix 5 – Quality appraisal assessments using Cochrane Risk of Bias tool modified by EPOC ..... 8

Appendix 6 – Outcome summary table for included studies (n=4) ..... 9

For peer review only

## Appendix 1 – Database Search Strategies

### Ovid MEDLINE(R) ALL <1946 to Feb 25, 2020>

1 Accidental Falls/  
 2 (slip\* or trip\* or stumbl\* or tumbl\*).tw,kf.  
 3 (fall\* or fell or "fall-related" or "near-fall").tw,kf.  
 4 or/1-3  
 5 limit 4 to "all aged (65 and over)"  
 6 exp Aged/ or geriatrics/  
 7 (geriatric\* or elder\* or age\* or "of age" or aging or senior\* or older  
 adult\* or retired or retiree\* or elder\* or pensioner\* or older people or older  
 patient\* or gerontology or Sexagenarian\* or septuagenarian\* or  
 octogenarian or nonagenarian\* or centenarian\* or sixties or seventies or  
 eighties or nineties).tw,kf.  
 8 4 and (6 or 7)  
 9 5 or 8  
 10 Social Isolation/  
 11 loneliness/  
 12 exp social support/  
 13 (social barrier\* or social isolat\* or social support\* or social car\* or  
 psychosocial support\* or psycho-social support\* or social frailt\* or  
 friendship\* or "social\* connected\*" or connectedness or lonely or loneliness  
 or "feel\* alone\*" or companionship).tw,kf.  
 14 ((lack or absence or minimi\*) adj2 (contact or communication or  
 support\*)),tw,kf.  
 15 or/10-14  
 16 9 and 15  
 17 animals/ not humans/  
 18 16 not 17

### PsycINFO <1806 to February Week 4 2020>

1 falls/  
 2 (slip\* or trip\* or stumbl\* or tumbl\*).tw.  
 3 (fall\* or fell or "fall-related" or "near-fall").tw.  
 4 or/1-3  
 5 limit 4 to "380 aged <age 65 yrs and older">  
 6 (geriatric\* or elder\* or age\* or "of age" or aging or senior\* or older  
 adult\* or retired or retiree\* or elder\* or pensioner\* or older people or older

patient\* or gerontology or Sexagenarian\* or septuagenarian\* or  
 octogenarian or nonagenarian\* or centenarian\* or sixties or seventies or  
 eighties or nineties).tw.  
 7 4 and 6  
 8 5 or 7  
 9 social isolation/ or loneliness/ or social support/ or friendship/  
 10 (social barrier\* or social isolat\* or social support\* or social car\* or  
 psychosocial support\* or psycho-social support\* or social frailt\* or  
 friendship\* or "social\* connected\*" or connectedness or lonely or loneliness  
 or "feel\* alone\*" or companionship).tw.  
 11 ((lack or absence or minimi\*) adj2 (contact or communication or  
 support\*)),tw.  
 12 or/9-11  
 13 8 and 12  
 14 Limit 13 to human

### Embase Classic+Embase <1947 to 2020 February 25>

1 falling/  
 2 (slip\* or trip\* or stumbl\* or tumbl\*).tw.  
 3 (fall\* or fell or "fall-related" or "near-fall").tw.  
 4 or/1-3  
 5 limit 4 to aged <65+ years>  
 6 loneliness/ or social support/ or friendship/  
 7 exp social isolation/  
 8 (social barrier\* or social isolat\* or social support\* or social car\* or  
 psychosocial support\* or psycho-social support\* or social frailt\* or  
 friendship\* or "social\* connected\*" or connectedness or lonely or loneliness  
 or "feel\* alone\*" or companionship).tw.  
 9 ((lack or absence or minimi\*) adj2 (contact or communication or  
 support\*)),tw.  
 10 or/6-9  
 11 5 and 10  
 12 limit 11 to human

### Database: EBM Reviews - Cochrane Database of Systematic Reviews <2005 to February 25, 2020>, EBM Reviews - ACP Journal Club <1991

**to February 2020>, EBM Reviews - Cochrane Clinical Answers  
<February 2020>, EBM Reviews - Database of Abstracts of Reviews of  
Effects <1st Quarter 2016>**

- 1 (slip\* or trip\* or stumbl\* or tumbl\*).mp.
- 2 (fall\* or fell or "fall-related" or "near-fall").mp.
- 3 1 or 2
- 4 (geriatric\* or elder\* or age\* or "of age" or aging or senior\* or older adult\* or retired or retiree\* or elder\* or pensioner\* or older people or older patient\* or gerontology or Sexagenarian\* or septuagenarian\* or octogenarian or nonagenarian\* or centenarian\* or sixties or seventies or eighties or nineties).mp.
- 5 3 and 4
- 6 (social barrier\* or social isolat\* or social support\* or social car\* or psychosocial support\* or psycho-social support\* or social frailt\* or friendship\* or "social\* connected\*" or connectedness or lonely or loneliness or "feel\* alone\*" or companionship).mp.
- 7 ((lack or absence or minimi\*) adj2 (contact or communication or support\*)).mp.
- 8 6 or 7
- 9 5 and 8

**Joanna Briggs Institute EBP Database - <Current to February 25,  
2020>**

- 1 (slip\* or trip\* or stumbl\* or tumbl\*).mp.
- 2 (fall\* or fell or "fall-related" or "near-fall").mp.
- 3 1 or 2
- 4 (geriatric\* or elder\* or age\* or "of age" or aging or senior\* or older adult\* or retired or retiree\* or elder\* or pensioner\* or older people or older patient\* or gerontology or Sexagenarian\* or septuagenarian\* or octogenarian or nonagenarian\* or centenarian\* or sixties or seventies or eighties or nineties).mp.
- 5 3 and 4
- 6 (social barrier\* or social isolation\* or social support\* or social car\* or psychosocial support\* or psycho-social support\* or social frailt\* or friendship\* or "social\* connected\*" or connectedness or lonely or loneliness or "feel\* alone\*" or companionship).mp.
- 7 ((lack or absence or minimi\*) adj2 (contact or communication or support\*)).mp.
- 8 6 or 7
- 9 5 and 8

**AMED (Allied and Complementary Medicine) <1985 to February  
2020>**

- 1 (slip\* or trip\* or stumbl\* or tumbl\*).mp.
- 2 (fall\* or fell or "fall-related" or "near-fall").mp.
- 3 1 or 2
- 4 (geriatric\* or elder\* or age\* or "of age" or aging or senior\* or older adult\* or retired or retiree\* or elder\* or pensioner\* or older people or older patient\* or gerontology or Sexagenarian\* or septuagenarian\* or octogenarian or nonagenarian\* or centenarian\* or sixties or seventies or eighties or nineties).mp.
- 5 3 and 4
- 6 (social barrier\* or social isolation\* or social support\* or social car\* or psychosocial support\* or psycho-social support\* or social frailt\* or friendship\* or "social\* connected\*" or connectedness or lonely or loneliness or "feel\* alone\*" or companionship).mp.
- 7 ((lack or absence or minimi\*) adj2 (contact or communication or support\*)).mp.
- 8 6 or 7
- 9 5 and 8

1  
2  
3  
4 Appendix 2 – Study Characteristics  
5

6  
7  
8  
9  
10  
11  
12  
13  
14  
15  
16  
17  
18  
19  
20  
21  
22  
23  
24  
25  
26  
27  
28  
29  
30  
31  
32  
33  
34  
35  
36  
37  
38  
39  
40  
41  
42  
43  
44  
45  
46  
47

| Author, year    | Study title                                                                                                                                                    | Journal name                             | Country                                                 | Study design                                                                          | Study duration (months) |
|-----------------|----------------------------------------------------------------------------------------------------------------------------------------------------------------|------------------------------------------|---------------------------------------------------------|---------------------------------------------------------------------------------------|-------------------------|
| Cohen, 2006     | The impact of professionally conducted cultural programs on the physical health, mental health, and social functioning of older adults                         | The Gerontologist                        | United States                                           | Non-randomized controlled trial                                                       | 12                      |
| Scharlach, 2015 | An Integrated Model of Co-ordinated Community-Based Care                                                                                                       | The Gerontologist                        | United States                                           | Uncontrolled before-after study                                                       | 6                       |
| Fransen, 2018   | The effectiveness of a coordinated preventive care approach for healthy ageing (UHCE) among older persons in five European cities: A pre-post controlled trial | International Journal of Nursing Studies | United Kingdom, Greece, Croatia, the Netherlands, Spain | Quasi-experimental (one site was randomized, four sites were controlled before-after) | 12                      |
| Dolovich, 2019  | Combining volunteers and primary care teamwork to support health goals and needs of older adults: a pragmatic randomized controlled trial                      | Canadian Medical Association Journal     | Canada                                                  | Randomized controlled trial                                                           | 6                       |

## Appendix 3 – Patient Characteristics

| DEMOGRAPHICS           |                                                                      |                                                                                        |                                                                                                                                                                                                                                   |                            |                           |                            |                                        |                       |
|------------------------|----------------------------------------------------------------------|----------------------------------------------------------------------------------------|-----------------------------------------------------------------------------------------------------------------------------------------------------------------------------------------------------------------------------------|----------------------------|---------------------------|----------------------------|----------------------------------------|-----------------------|
| Author, year           | Overall sample size                                                  | Overall age value                                                                      | Overall age type                                                                                                                                                                                                                  | Overall age variance value | Overall age variance type | % female*                  |                                        |                       |
| Cohen, 2006            | 166                                                                  | NR<br>(Reported mean age by group: intervention - 79.0 years, comparison - 79.6 years) | NR                                                                                                                                                                                                                                | NR                         | NR                        | NR                         |                                        |                       |
| Scharlach, 2015        | 21                                                                   | 76                                                                                     | median                                                                                                                                                                                                                            | NR                         | NR                        | 91                         |                                        |                       |
| Franse, 2018           | 2325                                                                 | 79.5                                                                                   | mean                                                                                                                                                                                                                              | 5.6                        | SD                        | 60.8                       |                                        |                       |
| Dolovich, 2019         | 312                                                                  | NR<br>(Reported mean age by group: intervention - 78.1 years, control - 79.1 years)    | NR                                                                                                                                                                                                                                | NR                         | NR                        | 62.2                       |                                        |                       |
| SETTING DATA           |                                                                      |                                                                                        |                                                                                                                                                                                                                                   |                            |                           |                            |                                        |                       |
| Author, year           | Intervention Setting                                                 | Participants living alone (%)                                                          | Description of access to caregivers                                                                                                                                                                                               |                            |                           |                            | Description of baseline social network |                       |
| Cohen, 2006            | Community                                                            | NR                                                                                     | NR                                                                                                                                                                                                                                |                            |                           |                            | NR                                     |                       |
| Scharlach, 2015        | Participant homes and community                                      | 67                                                                                     | NR                                                                                                                                                                                                                                |                            |                           |                            | NR                                     |                       |
| Franse, 2018           | Primary care and community settings                                  | 38.1                                                                                   | Care use i.e., hours per week receiving help in household work due to health problems and hours per week receiving help in caring for oneself was assessed. Hours/wk household help = control: 1.5 (5.3); intervention 1.0 (3.3). |                            |                           |                            | NR                                     |                       |
| Dolovich, 2019         | Participant homes and primary care                                   | NR                                                                                     | NR                                                                                                                                                                                                                                |                            |                           |                            | NR                                     |                       |
| FALLS AND FRAILTY DATA |                                                                      |                                                                                        |                                                                                                                                                                                                                                   |                            |                           |                            |                                        |                       |
| Author, year           | Participants with history of falling                                 | List of comorbidities                                                                  | Participants with frailty (%)                                                                                                                                                                                                     | Frailty scale              | Overall frailty score     | Overall frailty score type | Frailty variance value                 | Frailty variance type |
| Cohen, 2006            | baseline average falls per person - intervention: 0.40 control: 0.36 | NR                                                                                     | NR                                                                                                                                                                                                                                | NR                         | NR                        | NR                         | NR                                     | NR                    |

|                 |                                                      |    |      |                                 |     |      |     |    |
|-----------------|------------------------------------------------------|----|------|---------------------------------|-----|------|-----|----|
| Scharlach, 2015 | mean of 1.3 falls at baseline                        | NR | NR   | NR                              | NR  | NR   | NR  | NR |
| Franse, 2018    | 30.2% had a fall in the previous year                | NR | 20.2 | Tilburg Frailty indicator (TFI) | 5.1 | mean | 3.2 | SD |
| Dolovich, 2019  | 9.3% of participants had experienced 1 or more falls | NR | NR   | NR                              | NR  | NR   | NR  | NR |

**Abbreviations:** NR, not reported; SD, standard deviation

\*No studies reported having individuals who do not identify as female or male

For peer review only



1  
2  
3  
4  
5  
6  
7  
8  
9  
10  
11  
12  
13  
14  
15  
16  
17  
18  
19  
20  
21  
22  
23  
24  
25  
26  
27  
28  
29  
30  
31  
32  
33  
34  
35  
36  
37  
38  
39  
40  
41  
42  
43  
44  
45  
46  
47

Appendix 4 – Overall risk of bias across included studies (n=4)

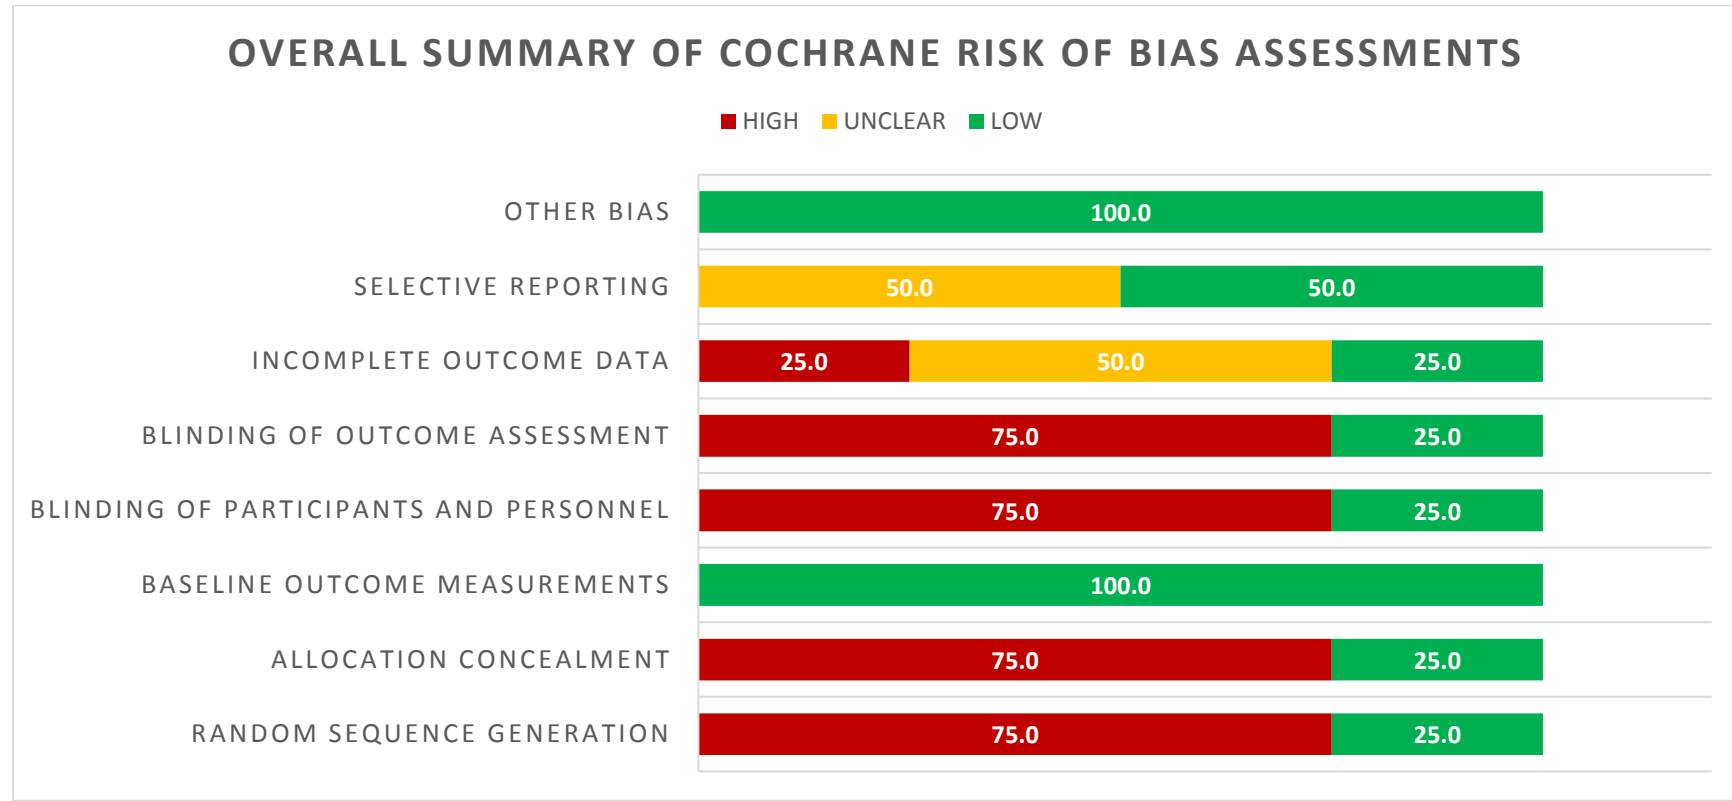

## Appendix 5 – Quality appraisal assessments using Cochrane Risk of Bias tool modified by EPOC

| Author, Year    | Trial identifier | Random sequence generation | Allocation concealment | Baseline outcome measurements | Blinding of participants and personnel | Blinding of outcome assessment | Incomplete outcome data | Selective reporting | Other bias | Funding details:                                                                                                                                                                                                                                                                                                                                                                                          |
|-----------------|------------------|----------------------------|------------------------|-------------------------------|----------------------------------------|--------------------------------|-------------------------|---------------------|------------|-----------------------------------------------------------------------------------------------------------------------------------------------------------------------------------------------------------------------------------------------------------------------------------------------------------------------------------------------------------------------------------------------------------|
| Cohen, 2006     | NR               | High risk                  | High risk              | Low risk                      | High risk                              | High risk                      | Unclear risk            | Unclear risk        | Low risk   | National Endowment for the Arts (lead sponsor); Center for Mental Health Services, Substance Abuse and Mental Health Services Administration, Department of Health and Human Services; National Institute of Mental Health, National Institutes of Health; National Retired Teachers Association/AARP; International Foundation for Music Research; Stella and Charles Guttman Foundation, New York City. |
| Scharlach, 2015 | NR               | High risk                  | High risk              | High risk                     | High risk                              | High risk                      | Unclear risk            | Unclear risk        | Low risk   | The SCAN Foundation                                                                                                                                                                                                                                                                                                                                                                                       |
| Franse, 2018    | NR               | High risk                  | High risk              | Low risk                      | High risk                              | High risk                      | High risk               | Low risk            | Low risk   | European Union, CHAFEA, third Health programme, grant number 20131201                                                                                                                                                                                                                                                                                                                                     |
| Dolovich, 2019  | NCT02283723      | Low risk                   | Low risk               | Low risk                      | Low risk                               | Low risk                       | Low risk                | Low risk            | Low risk   | Health Canada (grant no. 6817-06-2013/5570001), Government of Ontario (grant no. 06547 for INSPIRE-PHC), McMaster University & McMaster Family Health Organization                                                                                                                                                                                                                                        |

1  
2  
3  
4  
5  
6  
7  
8  
9  
10  
11  
12  
13  
14  
15  
16  
17  
18  
19  
20  
21  
22  
23  
24  
25  
26  
27  
28  
29  
30  
31  
32  
33  
34  
35  
36  
37  
38  
39  
40  
41  
42  
43  
44  
45  
46  
47

Appendix 6 – Outcome summary table for included studies (n=4)

| Author, Year                                                           | Treatment arms                                                                                                                                                                                                                                                                                                                                                                                                                                                                                                                                                                                                                                                                          | History of falls                                                                                                                           | Results                                                                                                                                                                                                                                                                                                                                                                    | Text description of effectiveness                                                                                                                                                                                                                                                                                                                                                                |
|------------------------------------------------------------------------|-----------------------------------------------------------------------------------------------------------------------------------------------------------------------------------------------------------------------------------------------------------------------------------------------------------------------------------------------------------------------------------------------------------------------------------------------------------------------------------------------------------------------------------------------------------------------------------------------------------------------------------------------------------------------------------------|--------------------------------------------------------------------------------------------------------------------------------------------|----------------------------------------------------------------------------------------------------------------------------------------------------------------------------------------------------------------------------------------------------------------------------------------------------------------------------------------------------------------------------|--------------------------------------------------------------------------------------------------------------------------------------------------------------------------------------------------------------------------------------------------------------------------------------------------------------------------------------------------------------------------------------------------|
| <p>Cohen, 2006</p> <p><i>Design: non-RCT</i></p>                       | <p><b>Singing in a chorale</b> (n=90)<br/>The intervention consisted of participating in a professionally conducted chorale in which there were weekly singing rehearsals for 30 weeks as well as public performances several times during the intervention period.</p> <p><b>Usual activities</b> (n=76)<br/>Participants in the comparison group continued their regular activities as usual, with the study introducing no changes other than the assessments.</p>                                                                                                                                                                                                                   | <p>Baseline average of 0.40 falls per person in the intervention group, and 0.36 per person in the control group in the past 12 months</p> | <p><b>UCLA Loneliness scale III</b><br/>Baseline: 35.1 (SD, 8.1)<br/>Follow-up: 34.6 (SD, 7.9)</p> <p>Baseline: 38.3 (SD, 10.1)<br/>Follow-up: 37.0 (SD, 10.3)</p>                                                                                                                                                                                                         | <p>Both groups evidenced a slight decrease in loneliness at the 12-month follow-up; however, the decrease in loneliness was greater for the intervention group than for the comparison. Analysis of covariance of the 12-month follow-up assessment continued to demonstrate a marginally significant difference between the two groups, <math>F(1,126) = 3.08</math>; <math>p = .08</math>.</p> |
| <p>Scharlach, 2015</p> <p><i>Design: Uncontrolled before-after</i></p> | <p><b>ElderHelp Concierge Club (CC)</b> (n=21)<br/>Integrated community-based care model that includes comprehensive personal and environmental, assessment, multilevel care co-ordination, a mix of professional and volunteer service providers, and a capitated, income-adjusted fee model. When individuals contact CC for information or services, they receive a brief assessment designed to determine their eligibility for CC services, as well as the type of services they appear to need: information and referral services only (Tier 1), transportation services only, or other CC services including in-home assessment by the CC Intake Specialist (Tiers 2 and 3).</p> | <p>Baseline mean of 1.3 falls over the past 6 months</p>                                                                                   | <p><b>Social Isolation (3-item scale)</b><br/>Baseline: 8.7 (SD, 3.2)<br/>Follow-up: 7.0 (SD, 3.8)</p> <p><b>Social interaction</b><br/><i>Interact with friends/relatives weekly</i><br/>Baseline: 76% of participants<br/>Follow-up: 100% of participants</p> <p><i>Attend monthly meetings</i><br/>Baseline: 33% of participants<br/>Follow-up: 48% of participants</p> | <p>Social isolation did not change significantly; nor did contact with friends and relatives or participation in meetings of organized groups.</p>                                                                                                                                                                                                                                               |

|                                                                                                                                                                        |                                                                                                                                                                                                                                                                                                                                                                                                                                                                                                                                                                                                                                                                                                                                                                                                                                                                                                                                                                              |                                                                      |                                                                                                                                                                                                                                                                                                                                                                                                                                                                                                       |                                                                                                                                                                                                                                                                                                          |
|------------------------------------------------------------------------------------------------------------------------------------------------------------------------|------------------------------------------------------------------------------------------------------------------------------------------------------------------------------------------------------------------------------------------------------------------------------------------------------------------------------------------------------------------------------------------------------------------------------------------------------------------------------------------------------------------------------------------------------------------------------------------------------------------------------------------------------------------------------------------------------------------------------------------------------------------------------------------------------------------------------------------------------------------------------------------------------------------------------------------------------------------------------|----------------------------------------------------------------------|-------------------------------------------------------------------------------------------------------------------------------------------------------------------------------------------------------------------------------------------------------------------------------------------------------------------------------------------------------------------------------------------------------------------------------------------------------------------------------------------------------|----------------------------------------------------------------------------------------------------------------------------------------------------------------------------------------------------------------------------------------------------------------------------------------------------------|
| <p>Fransé, 2018</p> <p><i>Design: one site randomized, 4 sites controlled before-after design; results combined all sites, so classified as quasi-experimental</i></p> | <p><b>Urban Health Centres Europe (UHCE) approach</b> (n=986)<br/>Preventive multidimensional health assessment and if person at risk, coordinated care pathways targeted at fall risk, appropriate medication use, loneliness and frailty</p> <p><b>Usual Care</b> (n=858)<br/>Usual care included access to their GP</p>                                                                                                                                                                                                                                                                                                                                                                                                                                                                                                                                                                                                                                                   | <p>30.2% of participants experienced a fall in the previous year</p> | <p><b>Loneliness (short JG scale)</b><br/>Baseline: 0.6 (SD, 0.7)<br/>Follow-up: 0.6 (SD, 0.7)</p> <p>Baseline: 0.6 (SD, 0.7)<br/>Follow-up: 0.7 (SD, 0.7)</p>                                                                                                                                                                                                                                                                                                                                        | <p>When comparing persons who enrolled in any type of care-pathway with all persons in the control group there was a positive effect on loneliness after adjusting for city clustering, age, gender, living situation, education, and baseline status of outcome (B= -0.18, 95% CI= -0.35 to -0.02).</p> |
| <p>Dolovich, 2019</p> <p><i>Design: RCT</i></p>                                                                                                                        | <p><b>Health TAPESTRY (Health Teams Advancing Patient Experience: STREngthening Quality) intervention</b> (n=158)<br/>Trained community volunteers visited patients to collect information on their life and health goals, risks and needs, daily life activities and general health, using structured surveys and unstructured narratives. The volunteers sent a report summarizing patients' goals, alerts, key issues and observations to the primary care interprofessional "huddle" team at the clinics. These interprofessional teams reviewed the reports and then generated, prioritized and acted upon plans of care for how the team, community agencies and volunteers could address clients' goals and health issues, with iterative follow-up</p> <p><b>Usual Care</b> (n=154)<br/>The control group received usual care and did not have volunteer visits. There was no restriction on receiving care from the same team members as the intervention group</p> | <p>9.3% of participants experienced 1 or more falls</p>              | <p><b>Social network score (DSSI-10)</b><br/>Baseline: Mean, 8.84 (SD, 1.52)<br/>Follow-up: Mean, 8.75 (SD, 1.52)</p> <p><b>Social satisfaction score (DSSI-10)</b><br/>Baseline: Mean, 18.89 (SD, 2.41)<br/>Follow-up: Mean, 18.96 (SD, 2.87)</p> <p><b>Social network score (DSSI-10)</b><br/>Baseline: Mean, 8.74 (SD, 1.61)<br/>Follow-up: Mean, 8.69 (SD, 1.53)</p> <p><b>Social satisfaction score (DSSI-10)</b><br/>Baseline: Mean, 19.19 (SD, 2.37)<br/>Follow-up: Mean, 19.04 (SD, 2.76)</p> | <p>There were no statistically significant between-group differences in participant ratings of self-efficacy, quality of life, optimal aging, social support</p>                                                                                                                                         |

# BMJ Open

## Interventions for social isolation in older adults who have experienced a fall: A systematic review

|                                 |                                                                                                                                                                                                                                                                                                                                                                                                                                                                                                                                                                                                                                                                                                                                                                                                                                                                                                                                                                                                                                                                                                                                                                                                                                                                                                                                                                                                                                                                                                                                                                                                                       |
|---------------------------------|-----------------------------------------------------------------------------------------------------------------------------------------------------------------------------------------------------------------------------------------------------------------------------------------------------------------------------------------------------------------------------------------------------------------------------------------------------------------------------------------------------------------------------------------------------------------------------------------------------------------------------------------------------------------------------------------------------------------------------------------------------------------------------------------------------------------------------------------------------------------------------------------------------------------------------------------------------------------------------------------------------------------------------------------------------------------------------------------------------------------------------------------------------------------------------------------------------------------------------------------------------------------------------------------------------------------------------------------------------------------------------------------------------------------------------------------------------------------------------------------------------------------------------------------------------------------------------------------------------------------------|
| Journal:                        | <i>BMJ Open</i>                                                                                                                                                                                                                                                                                                                                                                                                                                                                                                                                                                                                                                                                                                                                                                                                                                                                                                                                                                                                                                                                                                                                                                                                                                                                                                                                                                                                                                                                                                                                                                                                       |
| Manuscript ID                   | bmjopen-2021-056540.R2                                                                                                                                                                                                                                                                                                                                                                                                                                                                                                                                                                                                                                                                                                                                                                                                                                                                                                                                                                                                                                                                                                                                                                                                                                                                                                                                                                                                                                                                                                                                                                                                |
| Article Type:                   | Original research                                                                                                                                                                                                                                                                                                                                                                                                                                                                                                                                                                                                                                                                                                                                                                                                                                                                                                                                                                                                                                                                                                                                                                                                                                                                                                                                                                                                                                                                                                                                                                                                     |
| Date Submitted by the Author:   | 08-Feb-2022                                                                                                                                                                                                                                                                                                                                                                                                                                                                                                                                                                                                                                                                                                                                                                                                                                                                                                                                                                                                                                                                                                                                                                                                                                                                                                                                                                                                                                                                                                                                                                                                           |
| Complete List of Authors:       | Tricco, Andrea; St Michael's Hospital Li Ka Shing Knowledge Institute, Knowledge Translation Program; University of Toronto Dalla Lana School of Public Health, Epidemiology Division and Institute for Health, Management, and Evaluation<br>Thomas, Sonia; St Michael's Hospital Li Ka Shing Knowledge Institute, Knowledge Translation Program<br>Radhakrishnan, Amruta; St Michael's Hospital Li Ka Shing Knowledge Institute, Knowledge Translation Program<br>Ramkissoon, Naveeta; St Michael's Hospital Li Ka Shing Knowledge Institute, Knowledge Translation Program<br>Mitchell, Gary; Queen's University Belfast,<br>Fortune, Jennifer; RCSI University of Medicine and Health Sciences, Department of Public Health and Epidemiology<br>Jiang, Ying; Public Health Agency of Canada, Applied Research Division<br>de Groh, Margaret; Public Health Agency of Canada, Applied Research Division<br>Anderson, Kerry; Public Health Agency of Canada, Centre for Health Promotion<br>Barker, Joan; St Michael's Hospital Li Ka Shing Knowledge Institute, Knowledge Translation Program<br>Gauthier-Beaupré, Amélie; Public Health Agency of Canada, Centre for Health Promotion; University of Ottawa, Faculty of Health Sciences<br>Watt, Jennifer; St Michael's Hospital Li Ka Shing Knowledge Institute, Knowledge Translation Program; University of Toronto Faculty of Medicine, Department of Geriatric Medicine<br>Straus, Sharon; St Michael's Hospital Li Ka Shing Knowledge Institute, Knowledge Translation Program; University of Toronto Faculty of Medicine, Department of Geriatric Medicine |
| <b>Primary Subject Heading</b>: | Geriatric medicine                                                                                                                                                                                                                                                                                                                                                                                                                                                                                                                                                                                                                                                                                                                                                                                                                                                                                                                                                                                                                                                                                                                                                                                                                                                                                                                                                                                                                                                                                                                                                                                                    |
| Secondary Subject Heading:      | Rehabilitation medicine                                                                                                                                                                                                                                                                                                                                                                                                                                                                                                                                                                                                                                                                                                                                                                                                                                                                                                                                                                                                                                                                                                                                                                                                                                                                                                                                                                                                                                                                                                                                                                                               |
| Keywords:                       | REHABILITATION MEDICINE, GERIATRIC MEDICINE, PREVENTIVE MEDICINE                                                                                                                                                                                                                                                                                                                                                                                                                                                                                                                                                                                                                                                                                                                                                                                                                                                                                                                                                                                                                                                                                                                                                                                                                                                                                                                                                                                                                                                                                                                                                      |
|                                 |                                                                                                                                                                                                                                                                                                                                                                                                                                                                                                                                                                                                                                                                                                                                                                                                                                                                                                                                                                                                                                                                                                                                                                                                                                                                                                                                                                                                                                                                                                                                                                                                                       |

1  
2  
3  
4  
5  
6  
7  
8  
9  
10  
11  
12  
13  
14  
15  
16  
17  
18  
19  
20  
21  
22  
23  
24  
25  
26  
27  
28  
29  
30  
31  
32  
33  
34  
35  
36  
37  
38  
39  
40  
41  
42  
43  
44  
45  
46  
47  
48  
49  
50  
51  
52  
53  
54  
55  
56  
57  
58  
59  
60





I, the Submitting Author has the right to grant and does grant on behalf of all authors of the Work (as defined in the below author licence), an exclusive licence and/or a non-exclusive licence for contributions from authors who are: i) UK Crown employees; ii) where BMJ has agreed a CC-BY licence shall apply, and/or iii) in accordance with the terms applicable for US Federal Government officers or employees acting as part of their official duties; on a worldwide, perpetual, irrevocable, royalty-free basis to BMJ Publishing Group Ltd ("BMJ") its licensees and where the relevant Journal is co-owned by BMJ to the co-owners of the Journal, to publish the Work in this journal and any other BMJ products and to exploit all rights, as set out in our [licence](#).

The Submitting Author accepts and understands that any supply made under these terms is made by BMJ to the Submitting Author unless you are acting as an employee on behalf of your employer or a postgraduate student of an affiliated institution which is paying any applicable article publishing charge ("APC") for Open Access articles. Where the Submitting Author wishes to make the Work available on an Open Access basis (and intends to pay the relevant APC), the terms of reuse of such Open Access shall be governed by a Creative Commons licence – details of these licences and which [Creative Commons](#) licence will apply to this Work are set out in our licence referred to above.

Other than as permitted in any relevant BMJ Author's Self Archiving Policies, I confirm this Work has not been accepted for publication elsewhere, is not being considered for publication elsewhere and does not duplicate material already published. I confirm all authors consent to publication of this Work and authorise the granting of this licence.

1  
2  
3 **1 Interventions for social isolation in older adults who have experienced a fall:**

4  
5 **2 A systematic review**

6  
7  
8 3 Andrea C. Tricco<sup>1,2\*</sup> email: [Andrea.Tricco@unityhealth.to](mailto:Andrea.Tricco@unityhealth.to)

9  
10 4 Sonia M. Thomas<sup>1</sup> email: [Sonia.Thomas@unityhealth.to](mailto:Sonia.Thomas@unityhealth.to)

11  
12 5 Amruta Radhakrishnan<sup>1</sup> email: [Amruta.Radhakrishnan@unityhealth.to](mailto:Amruta.Radhakrishnan@unityhealth.to)

13  
14 6 Naveeta Ramkissoon<sup>1</sup> email: [Naveeta.Ramkissoon@unityhealth.to](mailto:Naveeta.Ramkissoon@unityhealth.to)

15  
16 7 Gary Mitchell<sup>3</sup> email: [Gary.Mitchell@qub.ac.uk](mailto:Gary.Mitchell@qub.ac.uk)

17  
18 8 Jennifer Fortune<sup>4</sup> email: [jenniferfortune@rcsi.ie](mailto:jenniferfortune@rcsi.ie)

19  
20 9 Ying Jiang<sup>5</sup> email: [ying.jiang@canada.ca](mailto:ying.jiang@canada.ca)

21  
22 10 Margaret de Groh<sup>5</sup> email: [margaret.degroh@canada.ca](mailto:margaret.degroh@canada.ca)

23  
24 11 Kerry Anderson<sup>6</sup> email: [kerry.anderson3@canada.ca](mailto:kerry.anderson3@canada.ca)

25  
26 12 Joan Barker<sup>1</sup> email: [joanbarker@rogers.com](mailto:joanbarker@rogers.com)

27  
28 13 Amélie Gauthier-Beaupré<sup>6,7</sup> email: [amelie.gauthier-beaupre@canada.ca](mailto:amelie.gauthier-beaupre@canada.ca)

29  
30 14 Jennifer Watt<sup>1,8</sup> email: [Jennifer.Watt@unityhealth.to](mailto:Jennifer.Watt@unityhealth.to)

31  
32 15 Sharon E. Straus<sup>1,8</sup> email: [Sharon.Straus@utoronto.ca](mailto:Sharon.Straus@utoronto.ca)

33  
34 16 <sup>1</sup>Li Ka Shing Knowledge Institute, St. Michael's Hospital, 209 Victoria Street, East Building,  
35  
36  
37 Toronto, Ontario, M5B 1W8, Canada

38  
39 18 <sup>2</sup>Epidemiology Division and Institute for Health, Management, and Evaluation, Dalla Lana  
40  
41  
42 School of Public Health, University of Toronto, Toronto, Ontario, Canada

43  
44 19 <sup>3</sup>School of Nursing and Midwifery, Queen's University Belfast, Belfast, Ireland

45  
46 20 <sup>4</sup>Department of Public Health and Epidemiology, RCSI University of Medicine and Health  
47  
48  
49  
50  
51  
52 Sciences, Dublin, Ireland



1  
2  
3 23 <sup>5</sup>Centre for Surveillance and Applied Research, Public Health Agency of Canada, Ottawa,  
4  
5 24 Ontario, Canada

6  
7  
8 25 <sup>6</sup>Centre for Health Promotion, Public Health Agency of Canada, Ottawa, Ontario, Canada

9  
10 26 <sup>7</sup>Faculty of Health Sciences, University of Ottawa, Ottawa, Ontario, Canada

11  
12 27 <sup>8</sup>Department of Geriatric Medicine, University of Toronto, Toronto, Ontario, Canada

13  
14  
15 28 **\*Corresponding Author:**

16  
17 29 Dr. Andrea C. Tricco, PhD, MSc

18  
19 30 Scientist and Director of the Knowledge Synthesis Team,

20  
21 31 Knowledge Translation Program, Li Ka Shing Knowledge Institute, St. Michael's Hospital

22  
23 32 209 Victoria Street, East Building, Toronto, Ontario, M5B 1W8, Canada

24  
25 33 Phone: (416) 864-6060 ext. 77521, Fax: (416) 864-6057, Email: [Andrea.Tricco@unityhealth.to](mailto:Andrea.Tricco@unityhealth.to)

1  
2  
3 34 **ABSTRACT**  
4

5 35 **Objectives:** The objective of our systematic review was to identify effective interventions to  
6  
7  
8 36 prevent or mitigate social isolation and/or loneliness in older adults who experienced a fall.  
9

10 37 **Design:** Systematic review  
11

12 38 **Data Sources:** MEDLINE, Embase, the Cochrane Central Register of Controlled Trials, and  
13  
14  
15 39 Ageline were searched (inception to February 2020).  
16

17 40 **Methods:** Studies were eligible if they described any intervention for social isolation in older  
18  
19  
20  
21  
22 41 adults living in a community setting who experienced a fall, and reported outcomes related to  
23  
24 42 social isolation or loneliness.

25  
26 43 Two independent reviewers screened citations, abstracted data, and appraised risk of bias using  
27  
28 44 the Cochrane risk-of-bias tool. The results were summarized descriptively.

29 45 **Results:** After screening 4,069 citations and 55 full-text articles, 4 studies were included. The  
30  
31 46 four studies varied in study design, including a randomized controlled trial, non-randomized  
32  
33 47 controlled trial, an uncontrolled before-after study, and a quasi-experimental study. Interventions  
34  
35 48 varied widely, and included singing in a choir, a patient-centred, interprofessional primary care  
36  
37 49 team-based approach, a multifactorial assessment targeting fall risk, appropriate medication use,  
38  
39  
40 50 loneliness and frailty, and a community-based care model that included comprehensive  
41  
42 51 assessments and multilevel care coordination. Outcome measures varied and included scales for  
43  
44 52 loneliness, social isolation, social interaction, social networks, and social satisfaction. Mixed  
45  
46 53 results were found, with three studies reporting no differences in social isolation or loneliness  
47  
48  
49 54 after the intervention. Only the multifactorial assessment intervention demonstrated a small  
50  
51 55 positive effect on loneliness compared to the control group after adjustment (B= -0.18, 95% CI=  
52  
53  
54 56 -0.35 to -0.02).  
55  
56  
57  
58  
59  
60

1  
2  
3 57 **Conclusions:** Few studies examined interventions for social isolation or loneliness in older  
4  
5 58 adults who experienced a fall. More research is warranted in this area.  
6

7  
8 59 **Systematic Review Registration:** PROSPERO (CRD42020198487)  
9

10 60 **Word count:** 266 (abstract), 3055 (main text)  
11

12 61 **Keywords:** systematic review, older adults, falling, social isolation, loneliness, interventions  
13

14  
15 62 **Strengths and limitations of this study:**  
16

- 17 63 • We conducted a comprehensive search of 4 databases, using a search strategy which was  
18  
19 64 peer-reviewed by a second librarian, and supplemented this by searching grey literature  
20  
21 65 and scanning references of included studies and relevant reviews.  
22  
23  
24 66 • We followed the methodology outlined by the Cochrane Handbook, with screening, data  
25  
26 67 abstraction, and risk of bias appraisal being conducted in duplicate by independent  
27  
28 68 reviewers, and our findings were reported using the PRISMA-2020 checklist.  
29  
30  
31 69 • We deviated from our protocol slightly due to the limited of data on older adults in a  
32  
33 70 community setting who had experienced a fall and expanded our inclusion criteria to  
34  
35 71 include studies where some participants (not all) had a history of falling.  
36  
37  
38 72 • Our included studies were plagued by risk of bias across several components, including  
39  
40 73 poor allocation concealment, lack of random sequence generation, and a lack of blinding  
41  
42 74 of participants, personnel, and outcome assessors.  
43  
44  
45 75 • A lack of standardization was observed across the outcomes assessed in the included  
46  
47 76 studies, due to lack of consensus on measures for social isolation and loneliness.  
48  
49  
50  
51  
52  
53  
54  
55  
56  
57  
58  
59  
60

## 77 INTRODUCTION

78 Worldwide, more than 37 million falls occur requiring medical attention every year(1). Almost  
79 650,000 people die every year from a fall, with those aged 65 years and older experiencing the  
80 greatest number of fatal falls(1). Falls are associated with considerable negative outcomes on  
81 older adults, such as physical inactivity, anxiety, depressive symptoms, and fear of falling(2, 3).

82 Social isolation is a serious consequence among older adults who have experienced a  
83 fall(4). Social isolation is a complex phenomenon that can be characterized by five key  
84 attributes: decreased number of social contacts, decreased feeling of belonging, reduced or lack  
85 of fulfilling relationships, decreased engagement with others, and reduced quality of the  
86 members in one's network(5). Loneliness is another consequence that may occur after a fall and  
87 can be defined as "the unpleasant experience that occurs when a person's network of social  
88 relations is deficient in some way, either quantitatively or qualitatively"(6). Some research has  
89 focused on the risk of social isolation and loneliness after experiencing a fall, since people who  
90 have experienced a fall are less likely to continue their activities of daily living(4). For example,  
91 one study reported a statistically significant relationship between feelings of loneliness and social  
92 exclusion after experiencing a fall(4).

93 Although social isolation and loneliness are related, it is important to note that they are  
94 two distinct concepts(7). Social isolation is more objective, as it can be measured by examining  
95 the presence or absence of relationships with other people, whereas loneliness is a person's  
96 subjective experience and is more difficult to measure. This distinction is important, as different  
97 interventions might be required for each of these outcomes after experiencing a fall.

98 Social isolation and loneliness among older adults is associated with many adverse health  
99 outcomes, including cognitive decline, depression, anxiety, and dementia(8). Interventions to

1  
2  
3 100 mitigate social isolation and loneliness after older adults experience a fall is of paramount  
4  
5 101 importance. Examples of interventions may include participating in social activities, outreach  
6  
7 102 calls from peers or healthcare workers, and group exercise. We are unaware of a previous  
8  
9 103 systematic review that examined this important issue. As such, the objective of our systematic  
10  
11 104 review was to identify effective interventions to mitigate social isolation and loneliness in older  
12  
13 105 adults who lived independently in a community setting with a history of falling.  
14  
15  
16  
17

## 18 106 **METHODS**

### 19 20 107 Protocol

21  
22 108 The protocol for this systematic review was developed in accordance with the Preferred  
23  
24 109 Reporting Items for Systematic Review and Meta-Analysis Protocols (PRISMA-P) checklist,  
25  
26 110 with consultation from knowledge users from the Public Health Agency of Canada who  
27  
28 111 commissioned this work and clinical experts on the team and was registered on PROSPERO  
29  
30 112 (CRD42020198487). This systematic review was conducted according to methodology outlined  
31  
32 113 in the Cochrane Handbook(9), and the PRISMA checklist (Supplementary File 1) was used to  
33  
34 114 guide the reporting of our results(10).  
35  
36  
37

### 38 39 115 Search strategy and selection criteria

40  
41 116 A comprehensive literature search strategy was developed by an experienced information  
42  
43 117 specialist and peer-reviewed by a second information specialist using the Peer Review of  
44  
45 118 Electronic Search Strategies (PRESS) checklist(11). MEDLINE, Embase, the Cochrane Central  
46  
47 119 Register of Controlled Trials, and Ageline were searched from inception until February 25, 2020  
48  
49 120 (Appendix 1). The reference lists of included studies and relevant reviews were also scanned. A  
50  
51 121 search for grey literature was conducted using the Canadian Agency for Drugs and Technologies  
52  
53 122 in Health (CADTH)'s Grey Matters checklist(12).  
54  
55  
56  
57  
58  
59  
60

1  
2  
3 123 Our eligibility criteria are summarized in Table 1. Studies were eligible for inclusion if  
4  
5 124 they described any intervention for social isolation or feelings of loneliness in older adults (mean  
6  
7  
8 125 age 65 years and older) with any participant reporting a history of falling (i.e., regardless of the  
9  
10 126 proportion of the sample who fell). The knowledge users from the Public Health Agency of  
11  
12 127 Canada requested that we focus this systematic review on participants who lived independently  
13  
14 128 in a community setting. Eligible study designs included randomized controlled trials (RCTs),  
15  
16 129 cohort studies, case control studies, non-randomized controlled trials, quasi-experimental studies,  
17  
18 130 interrupted time series or controlled/uncontrolled before after studies. Case reports, case series,  
19  
20 131 cross-sectional studies, qualitative studies, and reviews were not eligible for inclusion. Outcomes  
21  
22 132 of interest included any changes in social isolation or loneliness as measured using validated  
23  
24 133 scales, such as the De Jong Gierveld loneliness scale(13) and the Bude & Lantermann scale for  
25  
26 134 social exclusion(14), or any other quantitative measure of social isolation or loneliness. Social  
27  
28 135 isolation was defined as a decrease in the number of social contacts, decreased feeling of  
29  
30  
31 136 belonging, reduced or lack of fulfilling relationships, decreased engagement with others, and  
32  
33 137 reduced quality of the members in one's network(5). Loneliness was defined as "the unpleasant  
34  
35  
36 138 experience that occurs when a person's network of social relations is deficient in some way,  
37  
38  
39 139 either quantitatively or qualitatively(6).

40  
41  
42 140 All citations were screened by two independent reviewers who worked in pairs after the  
43  
44 141 entire team completed a training exercise on 50 citations and 78% agreement was achieved. Full-  
45  
46 142 text screening by two independent reviewers who worked in pairs began after a training exercise  
47  
48 143 on 22 articles amongst the team with an agreement of 75%. Discrepancies for both levels of  
49  
50 144 screening were resolved by a third reviewer or through discussion.

#### 51 52 53 145 Data abstraction and risk of bias appraisal

1  
2  
3 146 Data abstraction and risk of bias appraisal were also conducted independently by pairs of  
4  
5 147 reviewers who worked in pairs after a training pilot exercise reached sufficient agreement, and  
6  
7 148 discrepancies were resolved by a third reviewer. The risk of bias appraisal was conducted using  
8  
9 149 the Cochrane Effective Practice and Organisation of Care (EPOC) risk of bias tool, as it was  
10  
11 150 expected that a mixture of study designs would be included(15).  
12  
13

### 14 151 Synthesis

15  
16  
17 152 The findings of this review were summarized descriptively, reporting study and patient  
18  
19 153 characteristics, quality appraisal assessment, and intervention details. As outlined in our review  
20  
21 154 protocol, we planned to conduct a meta-analysis if more than one study evaluated the same  
22  
23 155 intervention, and a network meta-analysis for connected networks of trials with pre-specified  
24  
25 156 intervention nodes if over 10 trials were available and the number of trials was greater than the  
26  
27 157 number of interventions. However, as these conditions were not met, no statistical analyses were  
28  
29 158 conducted.  
30  
31  
32  
33

### 34 159 Patient and Public Involvement

35  
36  
37 160 A patient partner with previous experience of a fall was identified and involved in this study  
38  
39 161 from the protocol development stage. The patient partner provided input on our research question  
40  
41 162 and outcome measures to ensure that the patient perspective was incorporated. They also  
42  
43 163 participated in the screening training exercises for citations and full-text articles, provided  
44  
45 164 feedback on screening eligibility criteria, and reviewed the manuscript as a coauthor.  
46  
47  
48  
49

## 50 165 **RESULTS**

### 51 52 166 Study flow 53 54 55 56 57 58 59 60

1  
2  
3 167 After screening 4,069 citations and 55 full-text articles against our eligibility criteria, 4  
4  
5 168 studies(16-18) met the eligibility criteria and were included in this review (Figure 1).  
6

7  
8 169 Study and patient characteristics  
9

10 170 Study and patient characteristics are summarized in Table 2 and detailed characteristics are  
11  
12 171 reported in Appendices 1 and 2. The mean age of participants across included studies was 77.8  
13  
14 172 years (range: 76 to 79.5 years). Three of the included studies were conducted in North America  
15  
16 173 (75.0%) and one in Europe (25.0%) and they were conducted in a variety of settings including  
17  
18 174 the community setting, a combination of participant homes and community setting, a  
19  
20 175 combination of primary care and community setting, or a combination of participant homes and  
21  
22 176 primary care. Only one study provided data on frailty of the included participants, reporting  
23  
24 177 20.2% of participants with frailty (Appendix 2). The four studies varied in study design,  
25  
26 178 including a randomized controlled trial, a non-randomized controlled trial, an uncontrolled  
27  
28 179 before-after study, and a quasi-experimental study in which data from one randomized site was  
29  
30  
31 180 combined with data from four controlled before-after sites. Two of the studies had a study  
32  
33 181 duration of 12 months, and the other two had a duration of 6 months. The sample size in the  
34  
35 182 studies ranged from 21 to 2325 and, on average, 71.3% of participants were female.  
36  
37  
38

39  
40 183 Risk of bias results  
41

42 184 An overall summary of risk of bias across the four studies can be found in Appendix 3, and  
43  
44 185 detailed risk of bias assessments can be found in Appendix 4. All studies had low risk of bias for  
45  
46 186 baseline outcome measurements (100% low, 0% unclear, 0% high), and other bias (mainly  
47  
48 187 funding bias; 100% low, 0% unclear, 0% high). Two of the studies had low risk and two had  
49  
50 188 unclear risk of bias for selective reporting (50% low, 50% unclear, 0% high). One study had high  
51  
52 189 risk, two studies unclear risk, and one had low risk of bias for incomplete outcome data (25%  
53  
54  
55  
56  
57  
58  
59  
60



1  
2  
3 190 low, 50% unclear, 25% high). However, three of four studies had high risk of bias for blinding of  
4  
5 191 outcome assessment (25% low, 0% unclear, 75% high), blinding of participants and personnel  
6  
7 192 (25% low, 0% unclear, 75% high), random sequence generation (25% low, 0% unclear, 75%  
8  
9 193 high), and allocation concealment (25% low, 0% unclear, 75% high).

#### 12 194 Outcome results

14 195 The relevant findings from the four included studies are summarized in Appendix 6.  
15  
16 196 Cohen et al. (2006) conducted a non-randomized controlled trial in the United States assessing  
17  
18 197 the effects of singing in a chorale to reduce loneliness compared to usual care in 166 older adults.  
19  
20 198 The chorale intervention involved attendance at weekly singing rehearsals and several public  
21  
22 199 performances, while the usual care group continued their usual activities. Both groups had a  
23  
24 200 similar baseline history of falling over the past 12 months (average of 0.40 falls per person in the  
25  
26 201 intervention group, and 0.36 per person in the control group). After 12 months of follow-up, they  
27  
28 202 noted a reduction in loneliness (as measured using the UCLA Loneliness Scale-III) in both  
29  
30 203 groups (chorale: baseline mean: 35.1 (SD, 8.1) and follow-up mean: 34.6 (SD, 7.9); usual care:  
31  
32 204 baseline mean: 38.3 (SD, 10.1) and follow-up mean: 37.0 (SD, 10.3). While the chorale  
33  
34 205 intervention reported lower loneliness scores than the usual care group after 12 months of  
35  
36 206 follow-up, no statistically significant difference was observed ( $F(1,126) = 3.08; p = 0.08$ ).

37  
38 207 Scharlach et al. (2015) conducted an uncontrolled before-after study in the United States  
39  
40 208 assessing the effectiveness of their ElderHelp Concierge Club intervention on social isolation in  
41  
42 209 a sample of 21 participants(17). The Concierge Club intervention was a community-based care  
43  
44 210 model that provided different tiers of services to their members including information and  
45  
46 211 referrals, transportation, or in-house assessments. The baseline mean number of falls over the  
47  
48 212 past 6 months was 1.3. They noted that social isolation, as measured using an unnamed 3-item  
49  
50  
51  
52  
53  
54  
55  
56  
57  
58  
59

1  
2  
3 213 scale(19), did not change significantly after 6 months of follow-up (baseline mean: 8.7 (SD, 3.2)  
4  
5 214 and follow-up mean: 7.0 (SD, 3.8)). Similarly, although all participants reported having contact  
6  
7 215 with friends/relatives after the intervention, this was not found to be a significant change from  
8  
9 216 baseline (baseline: 76% of participants, follow-up: 100% of participants).

12 217 Franse et al. (2018) conducted a quasi-experimental study comparing the effectiveness of  
13  
14 218 the Urban Health Centres Europe (UHCE) approach compared to usual care on loneliness in a  
15  
16 219 sample of 1,844 older adults across the United Kingdom, Greece, Croatia, the Netherlands, and  
17  
18 220 Spain(18). The UHCE approach involved a preventative multidimensional health assessment,  
19  
20 221 which informed the coordination of specific care pathways targeting the individual's needs (such  
21  
22 222 as fall risk, appropriate medication use, loneliness, and frailty). The usual care group received  
23  
24 223 their usual care and had access to any already existing services. At baseline, 30.2% of  
25  
26 224 participants reported having experienced a fall in the past 12 months. Their adjusted analysis  
27  
28 225 found a small positive effect of the UHCE approach on loneliness, as measured using the short  
29  
30 226 De Jong Gierveld Loneliness scale(20), when compared to usual care (B= -0.18, 95% CI= -0.35  
31  
32 227 to -0.02).

37 228 Dolovich et al. (2019) conducted a randomized controlled trial comparing the  
38  
39 229 effectiveness of the Health TAPESTRY (Health Teams Advancing Patient Experience:  
40  
41 230 STRengthening qualitY) intervention compared to usual care on social isolation in a sample of  
42  
43 231 312 older adults in Canada(21). This intervention involved the collection of information on  
44  
45 232 patients' health goals and needs by trained volunteers, who then summarized these findings in a  
46  
47 233 report for the interprofessional primary care team. The primary care team used these reports to  
48  
49 234 generate and act on plans of care for how the team, community agencies, and volunteers could  
50  
51 235 help address each patient's goals. The control group received usual care. Approximately 9.3% of  
52  
53  
54  
55  
56  
57  
58  
59

1  
2  
3 236 participants reported experiencing at least one fall. After 6 months of follow-up, they found no  
4  
5 237 statistically significant difference between the intervention and control groups in terms of their  
6  
7  
8 238 social network scores (mean difference, 0.038 (95% CI: -0.25 to 0.33) and social satisfaction  
9  
10 239 scores (mean difference, 0.102 (95% CI, -0.35 to 0.55), as measured using the Duke Social  
11  
12 240 Support Index(22).

## 15 241 **DISCUSSION**

16  
17  
18 242 We conducted a comprehensive systematic review of interventions to mitigate social isolation  
19  
20 243 and loneliness in older adults living independently in a community setting who experienced a  
21  
22 244 fall. Very few studies were identified that fulfilled our eligibility criteria, indicating a dearth of  
23  
24  
25 245 evidence on this important topic. Only 4 studies were included and as each examined different  
26  
27 246 types of interventions, this precluded any statistical pooling of results. Furthermore, studies  
28  
29 247 varied on the proportion of participants who reported experiencing a fall and multiple types of  
30  
31  
32 248 outcomes were assessed for loneliness and social isolation, making it challenging to provide any  
33  
34 249 meaningful interpretation of results.

35  
36 250       Across the four studies in this systematic review, only the quasi-experimental study by  
37  
38  
39 251 Franse et al. (2018)(18), which assessed the impact of multifactorial health assessments and  
40  
41 252 coordinated care pathways targeting fall risk, medication use, loneliness and frailty, found a  
42  
43 253 small positive effect on loneliness (i.e. reduction) when comparing those that received the  
44  
45 254 intervention with the control group. However, given the paucity of data in older adults with a  
46  
47  
48 255 history of falling, the most effective intervention for preventing or reducing social isolation  
49  
50 256 remains unclear. Only one randomized controlled trial was identified in this review, highlighting  
51  
52 257 the need for more robust research in this important area.

1  
2  
3 258 We searched for previous reviews that were related and only one was identified. Gardiner  
4  
5 259 et al. (2016) conducted an integrative review on interventions for social isolation in older  
6  
7 260 adults(23). While this review was not specific to individuals who had experienced a fall, it  
8  
9 261 discusses characteristics of effective social isolation interventions in the broader older adult  
10  
11 262 population and could be applicable to the subset of this population that experiences falling.  
12  
13 263 While the majority of interventions they identified showed at least a moderate positive effect on  
14  
15 264 social isolation or loneliness, they noted that the quality of the evidence was poor, making it  
16  
17 265 difficult to identify a particular intervention as most effective(23). This is consistent with our  
18  
19 266 determination of the need for more robust research on the effectiveness of social isolation  
20  
21 267 interventions in older adults with a history of falling. They identified adaptability to local  
22  
23 268 contexts, community participation in the design and implementation of the intervention, and  
24  
25 269 productive engagement (as opposed to passive activities) as common features among successful  
26  
27 270 interventions(23). Future studies should consider these factors in the development and evaluation  
28  
29 271 of interventions for social isolation. Finally, we focused on the community setting at the request  
30  
31 272 of the Public Health Agency of Canada who felt that these results were most relevant to their  
32  
33 273 decision-making needs.  
34  
35  
36  
37  
38  
39

40 274 Across our included studies, all four interventions appeared to be adapted to their local  
41  
42 275 contexts. The UHCE approach by Franse et al. (2018) and the Health TAPESTRY intervention  
43  
44 276 by Dolovich et al. (2019) also involved strong community participation by tailoring their  
45  
46 277 intervention to each participant's health care needs, however it is unclear whether the subsequent  
47  
48 278 care pathways or plans allowed for productive engagement. Cohen et al. (2006)'s chorale  
49  
50 279 intervention provided productive engagement to participants but may have benefited from further  
51  
52 280 community participation in the implementation of the intervention.  
53  
54  
55  
56  
57  
58  
59

1  
2  
3 281           There are many strengths to our systematic review. Our search strategy was peer-  
4  
5 282 reviewed by a second librarian and was comprehensive through the inclusion of four databases,  
6  
7 283 searching grey literature and scanning references of included studies and relevant reviews. Our  
8  
9 284 methodology was informed by the Cochrane Handbook(9), with screening, data abstraction, and  
10  
11 285 risk of bias appraisal being conducted in duplicate by independent reviewers, and our findings  
12  
13 286 were reported using PRISMA-2020(10). However, there are some limitations. We deviated from  
14  
15 287 our protocol slightly to allow for inclusion of studies where only some participants had a history  
16  
17 288 of falling, given the paucity of data on older adults in a community setting who had experienced  
18  
19 289 a fall. We were unable to update our literature search due to a lack of sufficient funding. Further,  
20  
21 290 studies were plagued by risk of bias across several components, including to risk of bias from  
22  
23 291 poor allocation concealment, lack of random sequence generation, and a lack of blinding of  
24  
25 292 participants, personnel, and outcome assessors. A lack of standardization was observed across  
26  
27 293 the outcomes assessed in the included studies, suggesting that future work could focus on  
28  
29 294 developing consensus on measures for social isolation and loneliness that have already been  
30  
31 295 validated to establish a core outcomes dataset. Indeed, a study by Cornwell et al. (2009)  
32  
33 296 highlights the wide variation in indicators for isolation and loneliness and proposed combining  
34  
35 297 these varying indicators to develop two parsimonious scales to measure social disconnectedness  
36  
37 298 and perceived isolation (24), however, these scales were not used by the included studies here.  
38  
39 299 Furthermore, additional examination of tailoring interventions to reduce loneliness and/or social  
40  
41 300 isolation is warranted, as there was a dearth of included studies to examine this fully in this  
42  
43 301 systematic review with two studies each focusing on social isolation and loneliness separately.  
44  
45 302 Further research is warranted on this, as social isolation and loneliness are distinct concepts and  
46  
47  
48  
49  
50  
51  
52  
53  
54  
55  
56  
57  
58  
59  
60

1  
2  
3 303 different interventions may be required to target each outcome separately. Finally, we focused  
4  
5 304 our review on the community setting, at the request of the  
6

7  
8 305 We recommend updating this systematic review as more literature becomes available on  
9  
10 306 this topic. Effective interventions are necessary to support older people who are at increased risk  
11  
12 307 of social isolation, particularly after experiencing a fall. In addition, further work is required to  
13  
14 308 examine the relationship between social isolation, loneliness, and falling, and whether other  
15  
16 309 variables influence this relationship, as this may warrant different intervention approaches.  
17  
18

19 310 In conclusion, we identified four studies examining interventions for social isolation  
20  
21 311 amongst older adults with a history of falling. The interventions examined varied widely, from  
22  
23 312 singing in a chorale to community-base care coordination, as did the outcome measures used to  
24  
25 313 assess the effectiveness of the interventions. We identified only one quasi-experimental study  
26  
27 314 which demonstrated that multifactorial health assessments and coordinated care pathways  
28  
29 315 resulted in a small positive effect on loneliness in this population. Future research is warranted in  
30  
31 316 this under-studied area.  
32  
33  
34  
35  
36  
37  
38  
39  
40  
41  
42  
43  
44  
45  
46  
47  
48  
49  
50  
51  
52  
53  
54  
55  
56  
57  
58  
59  
60

1  
2  
3 317 **LIST OF ABBREVIATIONS**  
4

5 318 CADTH Canadian Agency for Drugs and Technologies in Health  
6  
7 319 CI Confidence interval  
8  
9 320 EPOC Effective Practice and Organisation of Care  
10  
11 321 IQR Interquartile range  
12  
13 322 PRESS Peer Review of Electronic Search Strategies  
14  
15 323 PRISMA Preferred Reporting Items for Systematic Reviews and Meta-Analyses  
16  
17 324 RCT Randomized controlled trial  
18  
19 325 SD Standard deviation  
20  
21  
22  
23

24  
25 326 **DECLARATIONS**  
26

27 327 Funding  
28

29 328 This work was funded through the SPOR Evidence Alliance. The SPOR Evidence Alliance is  
30  
31 329 supported by the Canadian Institutes of Health Research (CIHR) under Canada's Strategy for  
32  
33 330 Patient-Oriented Research (SPOR) initiative, and the generosity of partners from 41 public  
34  
35 331 agencies and organizations across Canada who have made cash or in-kind contributions. Dr.  
36  
37 332 Tricco is funded by a Tier 2 Canada Research Chair in Knowledge Synthesis, and Dr. Straus is  
38  
39 333 funded by a Tier 1 Canada Research Chair in Knowledge Translation.  
40  
41  
42

43 334 Acknowledgements  
44

45 335 We thank Jessie McGowan for developing our search strategies, Tamara Rader for peer  
46  
47 336 reviewing the search strategies (PRESS), and Alissa Epworth for running the searches, de-  
48  
49 337 duplicating results and obtaining full-text articles. We thank Joanne Bowater for her input during  
50  
51 338 earlier stages of the project. Finally, we thank Katrina Chiu, Navjot Mann, and Faryal Khan for  
52  
53 339 their support with formatting the manuscript and creating tables and appendices.  
54  
55  
56  
57  
58  
59  
60

1  
2  
3 340 Ethics approval

4  
5 341 Not required.

6  
7  
8 342 Consent for publication

9  
10 343 Not applicable.

11  
12 344 Author Contribution

13  
14 345 Substantial contributions to the conception or design of the work (ACT, SMT, JW, SES);

15  
16 346 acquisition, analysis, or interpretation of data for the work (all authors); drafting the work (ACT,

17  
18 347 SMT) or revising it critically for important intellectual content (AR, NR, GM, JF, YJ, MdG, KA,

19  
20 348 JB, AG-B, JW, SES); final approval of the version to be published (all authors); agreement to be

21  
22 349 accountable for all aspects of the work in ensuring that questions related to the accuracy or

23  
24 350 integrity of any part of the work are appropriately investigated and resolved (all authors)

25  
26 351 Availability of data and materials

27  
28 352 The full dataset is available from the corresponding author upon reasonable request.

29  
30 353 Conflict of interests

31  
32 354 All authors do not have any potential (or perceived) conflicts of interest.

33  
34 355 Role of the funder

35  
36 356 The funder had no role in the design and conduct of the study; collection, management, analysis,

37  
38 357 and interpretation of the data; preparation, review, or approval of the manuscript; or decision to

39  
40 358 submit the manuscript for publication.

41  
42 359 **SUPPLEMENTAL FILES**

43  
44 360 Supplemental File 1: PRISMA Checklist

45  
46 361 Supplemental File 2: Appendices

47  
48 362 **FIGURES**



1  
2  
3 363 Figure 1 – PRISMA study flow of included studies (n=4)  
4  
5  
6  
7  
8  
9  
10  
11  
12  
13  
14  
15  
16  
17  
18  
19  
20  
21  
22  
23  
24  
25  
26  
27  
28  
29  
30  
31  
32  
33  
34  
35  
36  
37  
38  
39  
40  
41  
42  
43  
44  
45  
46  
47  
48  
49  
50  
51  
52  
53  
54  
55  
56  
57  
58  
59  
60

For peer review only

1  
2  
3 **TABLES**  
4

5 Table 1 – Screening Eligibility Criteria  
6

7

|                  |                                                                                                                                                                                                                                                            |
|------------------|------------------------------------------------------------------------------------------------------------------------------------------------------------------------------------------------------------------------------------------------------------|
| 8 Population     | Older adults (mean age 65 years and older) living independently in a community setting with any participant reporting a history of falling (i.e., regardless of the proportion of the sample who fell)                                                     |
| 9 Intervention   | Any intervention for social isolation or loneliness                                                                                                                                                                                                        |
| 10 Comparator    | Usual care or another intervention for social isolation or loneliness                                                                                                                                                                                      |
| 11 Outcomes      | Any quantitative measures of changes in social isolation or loneliness<br>Ex: the quantity of social interactions, Lubben Social Network Scale for social isolation, De Jong Gierveld Loneliness Scale, Bude & Lantermann scale for social exclusion, etc. |
| 12 Study designs | Randomized controlled trial (RCT), non-RCT, quasi-experimental, interrupted time series, controlled or uncontrolled before-after, case control studies, cohort studies                                                                                     |
| 13 Time          | No time restrictions                                                                                                                                                                                                                                       |

14  
15  
16  
17  
18  
19  
20  
21  
22  
23  
24  
25  
26  
27  
28  
29  
30  
31  
32  
33  
34  
35  
36  
37  
38  
39  
40  
41  
42  
43  
44  
45  
46  
47  
48  
49  
50  
51  
52  
53  
54  
55  
56  
57  
58  
59  
60

Table 2 – Study and Patient Characteristics

| <b>Summary characteristics</b>                                                                                          |                     |
|-------------------------------------------------------------------------------------------------------------------------|---------------------|
| Mean age (range)                                                                                                        | 77.8 (76 to 79.6)*  |
| Mean % of female participants (range)                                                                                   | 71.3 (60.8 to 91)** |
| Mean sample size (range)                                                                                                | 837.3 (21 to 2325)  |
| Mean % of participants living alone (range)                                                                             | 52.6 (38.1 to 67)*  |
| Mean % of participants with history of falling (range)                                                                  | 19.6 (9.3 to 30.2)* |
| <b>Individual study details</b>                                                                                         |                     |
| <b>Cohen, 2006 → Chorale intervention</b>                                                                               |                     |
| Country of conduct: United States                                                                                       |                     |
| Study design: Non-randomized controlled trial                                                                           |                     |
| Study duration: 12 months                                                                                               |                     |
| Sample size: 166                                                                                                        |                     |
| Intervention setting: Community                                                                                         |                     |
| <b>Scharlach, 2015 → ElderHelp Concierge Club (CC) intervention</b>                                                     |                     |
| Country of conduct: United States                                                                                       |                     |
| Study design: Uncontrolled before-after study                                                                           |                     |
| Study duration: 6 months                                                                                                |                     |
| Sample size: 21                                                                                                         |                     |
| Intervention setting: Participant homes and community                                                                   |                     |
| <b>Franse, 2018 → Urban Health Centres Europe (UHCE) approach</b>                                                       |                     |
| Country of conduct: United Kingdom, Greece, Croatia, the Netherlands, Spain                                             |                     |
| Study design: Quasi-experimental (one site randomized, four sites controlled before-after)                              |                     |
| Study duration: 12 months                                                                                               |                     |
| Sample size: 2325                                                                                                       |                     |
| Intervention setting: Primary care and community settings                                                               |                     |
| <b>Dolovich, 2019 → Health TAPESTRY (Health Teams Advancing Patient Experience: STRengthening Quality) intervention</b> |                     |
| Country of conduct: Canada                                                                                              |                     |
| Study design: Randomized controlled trial                                                                               |                     |
| Study duration: 6 months                                                                                                |                     |
| Sample size: 312                                                                                                        |                     |
| Intervention setting: Participant homes and primary care                                                                |                     |

\*Only two of four studies reported on these variables

\*\*Only three of four studies reported on this variable

## REFERENCES

1. WHO. Falls 2018 [updated January 16, 2018. Available from: <https://www.who.int/news-room/fact-sheets/detail/falls>.
2. Terroso M, Rosa N, Torres Marques A, Simoes R. Physical consequences of falls in the elderly: a literature review from 1995 to 2010. *EURAPA*. 2014;11(1):51-9.
3. Petersen N, König HH, Hajek A. The link between falls, social isolation and loneliness: A systematic review. *Arch Gerontol Geriatr*. 2020;88:104020.
4. Hajek A, König H-H. The association of falls with loneliness and social exclusion: evidence from the DEAS German Ageing Survey. *BMC Geriatr*. 2017;17(1):204-.
5. Nicholson Jr. NR. Social isolation in older adults: an evolutionary concept analysis. *J Adv Nurs*. 2009;65(6):1342-52.
6. Perlman D, Peplau LA. Toward a social psychology of loneliness. *Pers Relatsh*. 1981;3:31-56.
7. de Jong Gierveld J, Van Tilburg T, Dykstra PA. Loneliness and social isolation. *Cambridge handbook of personal relationships*. 2006:485-500.
8. National Academies of Sciences E, Medicine. *Social Isolation and Loneliness in Older Adults: Opportunities for the Health Care System*. Washington, DC: NAP; 2020. 316 p.
9. Higgins JPT TJ, Chandler J, Cumpston M, Li T, Page MJ, Welch VA. *Cochrane Handbook for Systematic Reviews of Interventions version 6.1*: Cochrane; 2020.
10. Page MJ, McKenzie JE, Bossuyt PM, Boutron I, Hoffmann TC, Mulrow CD, et al. Updating guidance for reporting systematic reviews: development of the PRISMA 2020 statement. *J Clin Epidemiol*. 2021.
11. McGowan J, Sampson M, Salzwedel DM, Cogo E, Foerster V, Lefebvre C. *PRESS Peer Review of Electronic Search Strategies: 2015 Guideline Statement*. *J Clin Epidemiol*. 2016;75:40-6.
12. Wishart DS, Feunang YD, Guo AC, Lo EJ, Marcu A, Grant JR, et al. DrugBank 5.0: a major update to the DrugBank database for 2018. *Nucleic acids research*. 2018;46(D1):D1074-D82.
13. Gierveld JDJ, Tilburg TV. A 6-Item Scale for Overall, Emotional, and Social Loneliness: Confirmatory Tests on Survey Data. *Research on Aging*. 2006;28(5):582-98.
14. Bude H, Lantermann E-D. Soziale exklusion und exklusionsempfinden. *KZfSS*. 2006;58(2):233-52.
15. Cochrane Effective Practice and Organisation of Care (EPOC). *EPOC Resources for review authors 2017* [Available from: [https://epoc.cochrane.org/sites/epoc.cochrane.org/files/public/uploads/Resources-for-authors2017/suggested\\_risk\\_of\\_bias\\_criteria\\_for\\_epoc\\_reviews.pdf](https://epoc.cochrane.org/sites/epoc.cochrane.org/files/public/uploads/Resources-for-authors2017/suggested_risk_of_bias_criteria_for_epoc_reviews.pdf)].
16. Cohen GD, Perlstein S, Chapline J, Kelly J, Firth KM, Simmens S. The impact of professionally conducted cultural programs on the physical health, mental health, and social functioning of older adults. *The Gerontologist*. 2006;46(6):726-34.
17. Scharlach AE, Graham CL, Berridge C. An integrated model of co-ordinated community-based care. *The Gerontologist*. 2015;55(4):677-87.
18. Franse CB, van Grieken A, Alhambra-Borrás T, Valía-Cotanda E, van Staveren R, Rentoumis T, et al. The effectiveness of a coordinated preventive care approach for healthy ageing (UHCE) among older persons in five European cities: a pre-post controlled trial. *IJNS*. 2018;88:153-62.

19. Hughes ME, Waite LJ, Hawkley LC, Cacioppo JT. A Short Scale for Measuring Loneliness in Large Surveys: Results From Two Population-Based Studies. *Res Aging*. 2004;26(6):655-72.
20. De Jong Gierveld J, Van Tilburg T. The De Jong Gierveld short scales for emotional and social loneliness: tested on data from 7 countries in the UN generations and gender surveys. *Eur J Ageing*. 2010;7(2):121-30.
21. Dolovich L, Oliver D, Lamarche L, Thabane L, Valaitis R, Agarwal G, et al. Combining volunteers and primary care teamwork to support health goals and needs of older adults: a pragmatic randomized controlled trial. *CMAJ*. 2019;191(18):E491-E500.
22. Wardian J, Robbins D, Wolfersteig W, Johnson T, Dustman P. Validation of the DSSI-10 to Measure Social Support in a General Population. *RSWP*. 2013;23.
23. Gardiner C, Geldenhuys G, Gott M. Interventions to reduce social isolation and loneliness among older people: an integrative review. *Health Soc Care Community*. 2018;26(2):147-57.
24. Cornwell EY, Waite LJ. Measuring social isolation among older adults using multiple indicators from the NSHAP study. *J Gerontol B Psychol Sci Soc Sci*. 2009;64 Suppl 1(Suppl 1):i38-i46.

Figure 1 – PRISMA study flow of included studies (n=4)



## Supplementary File 1: PRISMA Checklist

| Section and Topic             | Item # | Checklist item                                                                                                                                                                                                                                                                                       | Location where item is reported |
|-------------------------------|--------|------------------------------------------------------------------------------------------------------------------------------------------------------------------------------------------------------------------------------------------------------------------------------------------------------|---------------------------------|
| <b>TITLE</b>                  |        |                                                                                                                                                                                                                                                                                                      |                                 |
| Title                         | 1      | Identify the report as a systematic review.                                                                                                                                                                                                                                                          | 1                               |
| <b>ABSTRACT</b>               |        |                                                                                                                                                                                                                                                                                                      |                                 |
| Abstract                      | 2      | See the PRISMA 2020 for Abstracts checklist.                                                                                                                                                                                                                                                         | 3-4                             |
| <b>INTRODUCTION</b>           |        |                                                                                                                                                                                                                                                                                                      |                                 |
| Rationale                     | 3      | Describe the rationale for the review in the context of existing knowledge.                                                                                                                                                                                                                          | 5                               |
| Objectives                    | 4      | Provide an explicit statement of the objective(s) or question(s) the review addresses.                                                                                                                                                                                                               | 5                               |
| <b>METHODS</b>                |        |                                                                                                                                                                                                                                                                                                      |                                 |
| Eligibility criteria          | 5      | Specify the inclusion and exclusion criteria for the review and how studies were grouped for the syntheses.                                                                                                                                                                                          | 6, Table 1                      |
| Information sources           | 6      | Specify all databases, registers, websites, organisations, reference lists and other sources searched or consulted to identify studies. Specify the date when each source was last searched or consulted.                                                                                            | 6                               |
| Search strategy               | 7      | Present the full search strategies for all databases, registers and websites, including any filters and limits used.                                                                                                                                                                                 | Appendix 1                      |
| Selection process             | 8      | Specify the methods used to decide whether a study met the inclusion criteria of the review, including how many reviewers screened each record and each report retrieved, whether they worked independently, and if applicable, details of automation tools used in the process.                     | 6-7                             |
| Data collection process       | 9      | Specify the methods used to collect data from reports, including how many reviewers collected data from each report, whether they worked independently, any processes for obtaining or confirming data from study investigators, and if applicable, details of automation tools used in the process. | 7                               |
| Data items                    | 10a    | List and define all outcomes for which data were sought. Specify whether all results that were compatible with each outcome domain in each study were sought (e.g. for all measures, time points, analyses), and if not, the methods used to decide which results to collect.                        | 7                               |
|                               | 10b    | List and define all other variables for which data were sought (e.g. participant and intervention characteristics, funding sources). Describe any assumptions made about any missing or unclear information.                                                                                         | 7                               |
| Study risk of bias assessment | 11     | Specify the methods used to assess risk of bias in the included studies, including details of the tool(s) used, how many reviewers assessed each study and whether they worked independently, and if applicable, details of automation tools used in the process.                                    | 8                               |
| Effect measures               | 12     | Specify for each outcome the effect measure(s) (e.g. risk ratio, mean difference) used in the synthesis or presentation of results.                                                                                                                                                                  | N/A                             |
| Synthesis methods             | 13a    | Describe the processes used to decide which studies were eligible for each synthesis (e.g. tabulating the study intervention characteristics and comparing against the planned groups for each synthesis (item #5)).                                                                                 | 8                               |
|                               | 13b    | Describe any methods required to prepare the data for presentation or synthesis, such as handling of missing summary statistics, or data conversions.                                                                                                                                                | 8                               |
|                               | 13c    | Describe any methods used to tabulate or visually display results of individual studies and syntheses.                                                                                                                                                                                               | 8                               |

| Section and Topic             | Item # | Checklist item                                                                                                                                                                                                                                                                       | Location where item is reported |
|-------------------------------|--------|--------------------------------------------------------------------------------------------------------------------------------------------------------------------------------------------------------------------------------------------------------------------------------------|---------------------------------|
|                               | 13d    | Describe any methods used to synthesize results and provide a rationale for the choice(s). If meta-analysis was performed, describe the model(s), method(s) to identify the presence and extent of statistical heterogeneity, and software package(s) used.                          | 8                               |
|                               | 13e    | Describe any methods used to explore possible causes of heterogeneity among study results (e.g. subgroup analysis, meta-regression).                                                                                                                                                 | N/A                             |
|                               | 13f    | Describe any sensitivity analyses conducted to assess robustness of the synthesized results.                                                                                                                                                                                         | N/A                             |
| Reporting bias assessment     | 14     | Describe any methods used to assess risk of bias due to missing results in a synthesis (arising from reporting biases).                                                                                                                                                              | 8                               |
| Certainty assessment          | 15     | Describe any methods used to assess certainty (or confidence) in the body of evidence for an outcome.                                                                                                                                                                                | N/A                             |
| <b>RESULTS</b>                |        |                                                                                                                                                                                                                                                                                      |                                 |
| Study selection               | 16a    | Describe the results of the search and selection process, from the number of records identified in the search to the number of studies included in the review, ideally using a flow diagram.                                                                                         | 9, Figure 1                     |
|                               | 16b    | Cite studies that might appear to meet the inclusion criteria, but which were excluded, and explain why they were excluded.                                                                                                                                                          | N/A                             |
| Study characteristics         | 17     | Cite each included study and present its characteristics.                                                                                                                                                                                                                            | 9-11, Table 2, Appendix 2       |
| Risk of bias in studies       | 18     | Present assessments of risk of bias for each included study.                                                                                                                                                                                                                         | 9, Appendix 5                   |
| Results of individual studies | 19     | For all outcomes, present, for each study: (a) summary statistics for each group (where appropriate) and (b) an effect estimate and its precision (e.g. confidence/credible interval), ideally using structured tables or plots.                                                     | 9-11, Appendix 6                |
| Results of syntheses          | 20a    | For each synthesis, briefly summarise the characteristics and risk of bias among contributing studies.                                                                                                                                                                               | N/A                             |
|                               | 20b    | Present results of all statistical syntheses conducted. If meta-analysis was done, present for each the summary estimate and its precision (e.g. confidence/credible interval) and measures of statistical heterogeneity. If comparing groups, describe the direction of the effect. | N/A                             |
|                               | 20c    | Present results of all investigations of possible causes of heterogeneity among study results.                                                                                                                                                                                       | N/A                             |
|                               | 20d    | Present results of all sensitivity analyses conducted to assess the robustness of the synthesized results.                                                                                                                                                                           | N/A                             |
| Reporting biases              | 21     | Present assessments of risk of bias due to missing results (arising from reporting biases) for each synthesis assessed.                                                                                                                                                              | N/A                             |
| Certainty of evidence         | 22     | Present assessments of certainty (or confidence) in the body of evidence for each outcome assessed.                                                                                                                                                                                  | N/A                             |
| <b>DISCUSSION</b>             |        |                                                                                                                                                                                                                                                                                      |                                 |
| Discussion                    | 23a    | Provide a general interpretation of the results in the context of other evidence.                                                                                                                                                                                                    | 12-14                           |
|                               | 23b    | Discuss any limitations of the evidence included in the review.                                                                                                                                                                                                                      | 14                              |
|                               | 23c    | Discuss any limitations of the review processes used.                                                                                                                                                                                                                                | 14                              |
|                               | 23d    | Discuss implications of the results for practice, policy, and future research.                                                                                                                                                                                                       | 13-15                           |
| <b>OTHER INFORMATION</b>      |        |                                                                                                                                                                                                                                                                                      |                                 |



| Section and Topic                              | Item # | Checklist item                                                                                                                                                                                                                             | Location where item is reported |
|------------------------------------------------|--------|--------------------------------------------------------------------------------------------------------------------------------------------------------------------------------------------------------------------------------------------|---------------------------------|
| Registration and protocol                      | 24a    | Provide registration information for the review, including register name and registration number, or state that the review was not registered.                                                                                             | 4                               |
|                                                | 24b    | Indicate where the review protocol can be accessed, or state that a protocol was not prepared.                                                                                                                                             | 6                               |
|                                                | 24c    | Describe and explain any amendments to information provided at registration or in the protocol.                                                                                                                                            | 14                              |
| Support                                        | 25     | Describe sources of financial or non-financial support for the review, and the role of the funders or sponsors in the review.                                                                                                              | 16-17                           |
| Competing interests                            | 26     | Declare any competing interests of review authors.                                                                                                                                                                                         | 17                              |
| Availability of data, code and other materials | 27     | Report which of the following are publicly available and where they can be found: template data collection forms; data extracted from included studies; data used for all analyses; analytic code; any other materials used in the review. | 17                              |

From: Page MJ, McKenzie JE, Bossuyt PM, Boutron I, Hoffmann TC, Mulrow CD, et al. The PRISMA 2020 statement: an updated guideline for reporting systematic reviews. *BMJ* 2021;372:n71. doi: 10.1136/bmj.n71

For more information, visit: <http://www.prisma-statement.org/>

1  
2  
3  
4  
5  
6  
7  
8  
9  
10  
11  
12  
13  
14  
15  
16  
17  
18  
19  
20  
21  
22  
23  
24  
25  
26  
27  
28  
29  
30  
31  
32  
33  
34  
35  
36  
37  
38  
39  
40  
41  
42  
43  
44  
45  
46  
47

## Supplementary File 2: Appendices

Appendix 1 – Database Search Strategies ..... 2

Appendix 2 – Study Characteristics..... 4

Appendix 3 – Patient Characteristics ..... 5

Appendix 4 – Overall risk of bias across included studies (n=4) ..... 7

Appendix 5 – Quality appraisal assessments using Cochrane Risk of Bias tool modified by EPOC ..... 8

Appendix 6 – Outcome summary table for included studies (n=4) ..... 9

For peer review only

## Appendix 1 – Database Search Strategies

### Ovid MEDLINE(R) ALL <1946 to Feb 25, 2020>

1 Accidental Falls/  
 2 (slip\* or trip\* or stumbl\* or tumbl\*).tw,kf.  
 3 (fall\* or fell or "fall-related" or "near-fall").tw,kf.  
 4 or/1-3  
 5 limit 4 to "all aged (65 and over)"  
 6 exp Aged/ or geriatrics/  
 7 (geriatric\* or elder\* or age\* or "of age" or aging or senior\* or older  
 adult\* or retired or retiree\* or elder\* or pensioner\* or older people or older  
 patient\* or gerontology or Sexagenarian\* or septuagenarian\* or  
 octogenarian or nonagenarian\* or centenarian\* or sixties or seventies or  
 eighties or nineties).tw,kf.  
 8 4 and (6 or 7)  
 9 5 or 8  
 10 Social Isolation/  
 11 loneliness/  
 12 exp social support/  
 13 (social barrier\* or social isolat\* or social support\* or social car\* or  
 psychosocial support\* or psycho-social support\* or social frailt\* or  
 friendship\* or "social\* connected\*" or connectedness or lonely or loneliness  
 or "feel\* alone\*" or companionship).tw,kf.  
 14 ((lack or absence or minimi\*) adj2 (contact or communication or  
 support\*)),tw,kf.  
 15 or/10-14  
 16 9 and 15  
 17 animals/ not humans/  
 18 16 not 17

### PsycINFO <1806 to February Week 4 2020>

1 falls/  
 2 (slip\* or trip\* or stumbl\* or tumbl\*).tw.  
 3 (fall\* or fell or "fall-related" or "near-fall").tw.  
 4 or/1-3  
 5 limit 4 to "380 aged <age 65 yrs and older">  
 6 (geriatric\* or elder\* or age\* or "of age" or aging or senior\* or older  
 adult\* or retired or retiree\* or elder\* or pensioner\* or older people or older

patient\* or gerontology or Sexagenarian\* or septuagenarian\* or  
 octogenarian or nonagenarian\* or centenarian\* or sixties or seventies or  
 eighties or nineties).tw.  
 7 4 and 6  
 8 5 or 7  
 9 social isolation/ or loneliness/ or social support/ or friendship/  
 10 (social barrier\* or social isolat\* or social support\* or social car\* or  
 psychosocial support\* or psycho-social support\* or social frailt\* or  
 friendship\* or "social\* connected\*" or connectedness or lonely or loneliness  
 or "feel\* alone\*" or companionship).tw.  
 11 ((lack or absence or minimi\*) adj2 (contact or communication or  
 support\*)),tw.  
 12 or/9-11  
 13 8 and 12  
 14 Limit 13 to human

### Embase Classic+Embase <1947 to 2020 February 25>

1 falling/  
 2 (slip\* or trip\* or stumbl\* or tumbl\*).tw.  
 3 (fall\* or fell or "fall-related" or "near-fall").tw.  
 4 or/1-3  
 5 limit 4 to aged <65+ years>  
 6 loneliness/ or social support/ or friendship/  
 7 exp social isolation/  
 8 (social barrier\* or social isolat\* or social support\* or social car\* or  
 psychosocial support\* or psycho-social support\* or social frailt\* or  
 friendship\* or "social\* connected\*" or connectedness or lonely or loneliness  
 or "feel\* alone\*" or companionship).tw.  
 9 ((lack or absence or minimi\*) adj2 (contact or communication or  
 support\*)),tw.  
 10 or/6-9  
 11 5 and 10  
 12 limit 11 to human

### Database: EBM Reviews - Cochrane Database of Systematic Reviews <2005 to February 25, 2020>, EBM Reviews - ACP Journal Club <1991

**to February 2020>, EBM Reviews - Cochrane Clinical Answers  
<February 2020>, EBM Reviews - Database of Abstracts of Reviews of  
Effects <1st Quarter 2016>**

- 1 (slip\* or trip\* or stumbl\* or tumbl\*).mp.
- 2 (fall\* or fell or "fall-related" or "near-fall").mp.
- 3 1 or 2
- 4 (geriatric\* or elder\* or age\* or "of age" or aging or senior\* or older adult\* or retired or retiree\* or elder\* or pensioner\* or older people or older patient\* or gerontology or Sexagenarian\* or septuagenarian\* or octogenarian or nonagenarian\* or centenarian\* or sixties or seventies or eighties or nineties).mp.
- 5 3 and 4
- 6 (social barrier\* or social isolat\* or social support\* or social car\* or psychosocial support\* or psycho-social support\* or social frailt\* or friendship\* or "social\* connected\*" or connectedness or lonely or loneliness or "feel\* alone\*" or companionship).mp.
- 7 ((lack or absence or minimi\*) adj2 (contact or communication or support\*)).mp.
- 8 6 or 7
- 9 5 and 8

**Joanna Briggs Institute EBP Database - <Current to February 25,  
2020>**

- 1 (slip\* or trip\* or stumbl\* or tumbl\*).mp.
- 2 (fall\* or fell or "fall-related" or "near-fall").mp.
- 3 1 or 2
- 4 (geriatric\* or elder\* or age\* or "of age" or aging or senior\* or older adult\* or retired or retiree\* or elder\* or pensioner\* or older people or older patient\* or gerontology or Sexagenarian\* or septuagenarian\* or octogenarian or nonagenarian\* or centenarian\* or sixties or seventies or eighties or nineties).mp.
- 5 3 and 4
- 6 (social barrier\* or social isolation\* or social support\* or social car\* or psychosocial support\* or psycho-social support\* or social frailt\* or friendship\* or "social\* connected\*" or connectedness or lonely or loneliness or "feel\* alone\*" or companionship).mp.
- 7 ((lack or absence or minimi\*) adj2 (contact or communication or support\*)).mp.
- 8 6 or 7
- 9 5 and 8

**AMED (Allied and Complementary Medicine) <1985 to February  
2020>**

- 1 (slip\* or trip\* or stumbl\* or tumbl\*).mp.
- 2 (fall\* or fell or "fall-related" or "near-fall").mp.
- 3 1 or 2
- 4 (geriatric\* or elder\* or age\* or "of age" or aging or senior\* or older adult\* or retired or retiree\* or elder\* or pensioner\* or older people or older patient\* or gerontology or Sexagenarian\* or septuagenarian\* or octogenarian or nonagenarian\* or centenarian\* or sixties or seventies or eighties or nineties).mp.
- 5 3 and 4
- 6 (social barrier\* or social isolation\* or social support\* or social car\* or psychosocial support\* or psycho-social support\* or social frailt\* or friendship\* or "social\* connected\*" or connectedness or lonely or loneliness or "feel\* alone\*" or companionship).mp.
- 7 ((lack or absence or minimi\*) adj2 (contact or communication or support\*)).mp.
- 8 6 or 7
- 9 5 and 8

1  
2  
3  
4 Appendix 2 – Study Characteristics  
5

6  
7  
8  
9  
10  
11  
12  
13  
14  
15  
16  
17  
18  
19  
20  
21  
22  
23  
24  
25  
26  
27  
28  
29  
30  
31  
32  
33  
34  
35  
36  
37  
38  
39  
40  
41  
42  
43  
44  
45  
46  
47

| Author, year    | Study title                                                                                                                                                    | Journal name                             | Country                                                 | Study design                                                                          | Study duration (months) |
|-----------------|----------------------------------------------------------------------------------------------------------------------------------------------------------------|------------------------------------------|---------------------------------------------------------|---------------------------------------------------------------------------------------|-------------------------|
| Cohen, 2006     | The impact of professionally conducted cultural programs on the physical health, mental health, and social functioning of older adults                         | The Gerontologist                        | United States                                           | Non-randomized controlled trial                                                       | 12                      |
| Scharlach, 2015 | An Integrated Model of Co-ordinated Community-Based Care                                                                                                       | The Gerontologist                        | United States                                           | Uncontrolled before-after study                                                       | 6                       |
| Fransse, 2018   | The effectiveness of a coordinated preventive care approach for healthy ageing (UHCE) among older persons in five European cities: A pre-post controlled trial | International Journal of Nursing Studies | United Kingdom, Greece, Croatia, the Netherlands, Spain | Quasi-experimental (one site was randomized, four sites were controlled before-after) | 12                      |
| Dolovich, 2019  | Combining volunteers and primary care teamwork to support health goals and needs of older adults: a pragmatic randomized controlled trial                      | Canadian Medical Association Journal     | Canada                                                  | Randomized controlled trial                                                           | 6                       |

## Appendix 3 – Patient Characteristics

| DEMOGRAPHICS            |                                                                      |                                                                                        |                                                                                                                                                                                                                                   |                            |                           |                            |                                        |                       |
|-------------------------|----------------------------------------------------------------------|----------------------------------------------------------------------------------------|-----------------------------------------------------------------------------------------------------------------------------------------------------------------------------------------------------------------------------------|----------------------------|---------------------------|----------------------------|----------------------------------------|-----------------------|
| Author, year            | Overall sample size                                                  | Overall age value                                                                      | Overall age type                                                                                                                                                                                                                  | Overall age variance value | Overall age variance type | % female*                  |                                        |                       |
| Cohen, 2006             | 166                                                                  | NR<br>(Reported mean age by group: intervention - 79.0 years, comparison - 79.6 years) | NR                                                                                                                                                                                                                                | NR                         | NR                        | NR                         |                                        |                       |
| Scharlach, 2015         | 21                                                                   | 76                                                                                     | median                                                                                                                                                                                                                            | NR                         | NR                        | 91                         |                                        |                       |
| Franse, 2018            | 2325                                                                 | 79.5                                                                                   | mean                                                                                                                                                                                                                              | 5.6                        | SD                        | 60.8                       |                                        |                       |
| Dolovich, 2019          | 312                                                                  | NR<br>(Reported mean age by group: intervention - 78.1 years, control - 79.1 years)    | NR                                                                                                                                                                                                                                | NR                         | NR                        | 62.2                       |                                        |                       |
| SETTING DATA            |                                                                      |                                                                                        |                                                                                                                                                                                                                                   |                            |                           |                            |                                        |                       |
| Author, year            | Intervention Setting                                                 | Participants living alone (%)                                                          | Description of access to caregivers                                                                                                                                                                                               |                            |                           |                            | Description of baseline social network |                       |
| Cohen, 2006             | Community                                                            | NR                                                                                     | NR                                                                                                                                                                                                                                |                            |                           |                            | NR                                     |                       |
| Scharlach, 2015         | Participant homes and community                                      | 67                                                                                     | NR                                                                                                                                                                                                                                |                            |                           |                            | NR                                     |                       |
| Franse, 2018            | Primary care and community settings                                  | 38.1                                                                                   | Care use i.e., hours per week receiving help in household work due to health problems and hours per week receiving help in caring for oneself was assessed. Hours/wk household help = control: 1.5 (5.3); intervention 1.0 (3.3). |                            |                           |                            | NR                                     |                       |
| Dolovich, 2019          | Participant homes and primary care                                   | NR                                                                                     | NR                                                                                                                                                                                                                                |                            |                           |                            | NR                                     |                       |
| FALLS AND FRAILITY DATA |                                                                      |                                                                                        |                                                                                                                                                                                                                                   |                            |                           |                            |                                        |                       |
| Author, year            | Participants with history of falling                                 | List of comorbidities                                                                  | Participants with frailty (%)                                                                                                                                                                                                     | Frailty scale              | Overall frailty score     | Overall frailty score type | Frailty variance value                 | Frailty variance type |
| Cohen, 2006             | baseline average falls per person - intervention: 0.40 control: 0.36 | NR                                                                                     | NR                                                                                                                                                                                                                                | NR                         | NR                        | NR                         | NR                                     | NR                    |

|                 |                                                      |    |      |                                 |     |      |     |    |
|-----------------|------------------------------------------------------|----|------|---------------------------------|-----|------|-----|----|
| Scharlach, 2015 | mean of 1.3 falls at baseline                        | NR | NR   | NR                              | NR  | NR   | NR  | NR |
| Franse, 2018    | 30.2% had a fall in the previous year                | NR | 20.2 | Tilburg Frailty indicator (TFI) | 5.1 | mean | 3.2 | SD |
| Dolovich, 2019  | 9.3% of participants had experienced 1 or more falls | NR | NR   | NR                              | NR  | NR   | NR  | NR |

**Abbreviations:** NR, not reported; SD, standard deviation

\*No studies reported having individuals who do not identify as female or male

For peer review only

1  
2  
3  
4  
5  
6  
7  
8  
9  
10  
11  
12  
13  
14  
15  
16  
17  
18  
19  
20  
21  
22  
23  
24  
25  
26  
27  
28  
29  
30  
31  
32  
33  
34  
35  
36  
37  
38  
39  
40  
41  
42  
43  
44  
45  
46  
47

Appendix 4 – Overall risk of bias across included studies (n=4)





## Appendix 5 – Quality appraisal assessments using Cochrane Risk of Bias tool modified by EPOC

| Author, Year    | Trial identifier | Random sequence generation | Allocation concealment | Baseline outcome measurements | Blinding of participants and personnel | Blinding of outcome assessment | Incomplete outcome data | Selective reporting | Other bias | Funding details:                                                                                                                                                                                                                                                                                                                                                                                          |
|-----------------|------------------|----------------------------|------------------------|-------------------------------|----------------------------------------|--------------------------------|-------------------------|---------------------|------------|-----------------------------------------------------------------------------------------------------------------------------------------------------------------------------------------------------------------------------------------------------------------------------------------------------------------------------------------------------------------------------------------------------------|
| Cohen, 2006     | NR               | High risk                  | High risk              | Low risk                      | High risk                              | High risk                      | Unclear risk            | Unclear risk        | Low risk   | National Endowment for the Arts (lead sponsor); Center for Mental Health Services, Substance Abuse and Mental Health Services Administration, Department of Health and Human Services; National Institute of Mental Health, National Institutes of Health; National Retired Teachers Association/AARP; International Foundation for Music Research; Stella and Charles Guttman Foundation, New York City. |
| Scharlach, 2015 | NR               | High risk                  | High risk              | High risk                     | High risk                              | High risk                      | Unclear risk            | Unclear risk        | Low risk   | The SCAN Foundation                                                                                                                                                                                                                                                                                                                                                                                       |
| Franse, 2018    | NR               | High risk                  | High risk              | Low risk                      | High risk                              | High risk                      | High risk               | Low risk            | Low risk   | European Union, CHAFEA, third Health programme, grant number 20131201                                                                                                                                                                                                                                                                                                                                     |
| Dolovich, 2019  | NCT02283723      | Low risk                   | Low risk               | Low risk                      | Low risk                               | Low risk                       | Low risk                | Low risk            | Low risk   | Health Canada (grant no. 6817-06-2013/5570001), Government of Ontario (grant no. 06547 for INSPIRE-PHC), McMaster University & McMaster Family Health Organization                                                                                                                                                                                                                                        |

1  
2  
3  
4  
5  
6  
7  
8  
9  
10  
11  
12  
13  
14  
15  
16  
17  
18  
19  
20  
21  
22  
23  
24  
25  
26  
27  
28  
29  
30  
31  
32  
33  
34  
35  
36  
37  
38  
39  
40  
41  
42  
43  
44  
45  
46  
47

Appendix 6 – Outcome summary table for included studies (n=4)

| Author, Year                                                           | Treatment arms                                                                                                                                                                                                                                                                                                                                                                                                                                                                                                                                                                                                                                                                          | History of falls                                                                                                                           | Results                                                                                                                                                                                                                                                                                                                                                                    | Text description of effectiveness                                                                                                                                                                                                                                                                                                                                                                |
|------------------------------------------------------------------------|-----------------------------------------------------------------------------------------------------------------------------------------------------------------------------------------------------------------------------------------------------------------------------------------------------------------------------------------------------------------------------------------------------------------------------------------------------------------------------------------------------------------------------------------------------------------------------------------------------------------------------------------------------------------------------------------|--------------------------------------------------------------------------------------------------------------------------------------------|----------------------------------------------------------------------------------------------------------------------------------------------------------------------------------------------------------------------------------------------------------------------------------------------------------------------------------------------------------------------------|--------------------------------------------------------------------------------------------------------------------------------------------------------------------------------------------------------------------------------------------------------------------------------------------------------------------------------------------------------------------------------------------------|
| <p>Cohen, 2006</p> <p><i>Design: non-RCT</i></p>                       | <p><b>Singing in a chorale</b> (n=90)<br/>The intervention consisted of participating in a professionally conducted chorale in which there were weekly singing rehearsals for 30 weeks as well as public performances several times during the intervention period.</p> <p><b>Usual activities</b> (n=76)<br/>Participants in the comparison group continued their regular activities as usual, with the study introducing no changes other than the assessments.</p>                                                                                                                                                                                                                   | <p>Baseline average of 0.40 falls per person in the intervention group, and 0.36 per person in the control group in the past 12 months</p> | <p><b>UCLA Loneliness scale III</b><br/>Baseline: 35.1 (SD, 8.1)<br/>Follow-up: 34.6 (SD, 7.9)</p> <p>Baseline: 38.3 (SD, 10.1)<br/>Follow-up: 37.0 (SD, 10.3)</p>                                                                                                                                                                                                         | <p>Both groups evidenced a slight decrease in loneliness at the 12-month follow-up; however, the decrease in loneliness was greater for the intervention group than for the comparison. Analysis of covariance of the 12-month follow-up assessment continued to demonstrate a marginally significant difference between the two groups, <math>F(1,126) = 3.08</math>; <math>p = .08</math>.</p> |
| <p>Scharlach, 2015</p> <p><i>Design: Uncontrolled before-after</i></p> | <p><b>ElderHelp Concierge Club (CC)</b> (n=21)<br/>Integrated community-based care model that includes comprehensive personal and environmental, assessment, multilevel care co-ordination, a mix of professional and volunteer service providers, and a capitated, income-adjusted fee model. When individuals contact CC for information or services, they receive a brief assessment designed to determine their eligibility for CC services, as well as the type of services they appear to need: information and referral services only (Tier 1), transportation services only, or other CC services including in-home assessment by the CC Intake Specialist (Tiers 2 and 3).</p> | <p>Baseline mean of 1.3 falls over the past 6 months</p>                                                                                   | <p><b>Social Isolation (3-item scale)</b><br/>Baseline: 8.7 (SD, 3.2)<br/>Follow-up: 7.0 (SD, 3.8)</p> <p><b>Social interaction</b><br/><i>Interact with friends/relatives weekly</i><br/>Baseline: 76% of participants<br/>Follow-up: 100% of participants</p> <p><i>Attend monthly meetings</i><br/>Baseline: 33% of participants<br/>Follow-up: 48% of participants</p> | <p>Social isolation did not change significantly; nor did contact with friends and relatives or participation in meetings of organized groups.</p>                                                                                                                                                                                                                                               |

|                                                                                                                                                                        |                                                                                                                                                                                                                                                                                                                                                                                                                                                                                                                                                                                                                                                                                                                                                                                                                                                                                                                                                                              |                                                                      |                                                                                                                                                                                                                                                                                                                                                                                                                                                                                                       |                                                                                                                                                                                                                                                                                                          |
|------------------------------------------------------------------------------------------------------------------------------------------------------------------------|------------------------------------------------------------------------------------------------------------------------------------------------------------------------------------------------------------------------------------------------------------------------------------------------------------------------------------------------------------------------------------------------------------------------------------------------------------------------------------------------------------------------------------------------------------------------------------------------------------------------------------------------------------------------------------------------------------------------------------------------------------------------------------------------------------------------------------------------------------------------------------------------------------------------------------------------------------------------------|----------------------------------------------------------------------|-------------------------------------------------------------------------------------------------------------------------------------------------------------------------------------------------------------------------------------------------------------------------------------------------------------------------------------------------------------------------------------------------------------------------------------------------------------------------------------------------------|----------------------------------------------------------------------------------------------------------------------------------------------------------------------------------------------------------------------------------------------------------------------------------------------------------|
| <p>Fransé, 2018</p> <p><i>Design: one site randomized, 4 sites controlled before-after design; results combined all sites, so classified as quasi-experimental</i></p> | <p><b>Urban Health Centres Europe (UHCE) approach</b> (n=986)<br/>Preventive multidimensional health assessment and if person at risk, coordinated care pathways targeted at fall risk, appropriate medication use, loneliness and frailty</p> <p><b>Usual Care</b> (n=858)<br/>Usual care included access to their GP</p>                                                                                                                                                                                                                                                                                                                                                                                                                                                                                                                                                                                                                                                   | <p>30.2% of participants experienced a fall in the previous year</p> | <p><b>Loneliness (short JG scale)</b><br/>Baseline: 0.6 (SD, 0.7)<br/>Follow-up: 0.6 (SD, 0.7)</p> <p>Baseline: 0.6 (SD, 0.7)<br/>Follow-up: 0.7 (SD, 0.7)</p>                                                                                                                                                                                                                                                                                                                                        | <p>When comparing persons who enrolled in any type of care-pathway with all persons in the control group there was a positive effect on loneliness after adjusting for city clustering, age, gender, living situation, education, and baseline status of outcome (B= -0.18, 95% CI= -0.35 to -0.02).</p> |
| <p>Dolovich, 2019</p> <p><i>Design: RCT</i></p>                                                                                                                        | <p><b>Health TAPESTRY (Health Teams Advancing Patient Experience: STREngthening Quality) intervention</b> (n=158)<br/>Trained community volunteers visited patients to collect information on their life and health goals, risks and needs, daily life activities and general health, using structured surveys and unstructured narratives. The volunteers sent a report summarizing patients' goals, alerts, key issues and observations to the primary care interprofessional "huddle" team at the clinics. These interprofessional teams reviewed the reports and then generated, prioritized and acted upon plans of care for how the team, community agencies and volunteers could address clients' goals and health issues, with iterative follow-up</p> <p><b>Usual Care</b> (n=154)<br/>The control group received usual care and did not have volunteer visits. There was no restriction on receiving care from the same team members as the intervention group</p> | <p>9.3% of participants experienced 1 or more falls</p>              | <p><b>Social network score (DSSI-10)</b><br/>Baseline: Mean, 8.84 (SD, 1.52)<br/>Follow-up: Mean, 8.75 (SD, 1.52)</p> <p><b>Social satisfaction score (DSSI-10)</b><br/>Baseline: Mean, 18.89 (SD, 2.41)<br/>Follow-up: Mean, 18.96 (SD, 2.87)</p> <p><b>Social network score (DSSI-10)</b><br/>Baseline: Mean, 8.74 (SD, 1.61)<br/>Follow-up: Mean, 8.69 (SD, 1.53)</p> <p><b>Social satisfaction score (DSSI-10)</b><br/>Baseline: Mean, 19.19 (SD, 2.37)<br/>Follow-up: Mean, 19.04 (SD, 2.76)</p> | <p>There were no statistically significant between-group differences in participant ratings of self-efficacy, quality of life, optimal aging, social support</p>                                                                                                                                         |
